# Supplementary material for: Olfactory receptor subgenome and expression in a highly olfactory procellariiform seabird
Source: Oxford University Press journal article supplement (doi:10.1093/genetics/iyab210), 2021-10-04
Supplement: iyab210_supplemental_material_legends.docx [file iyab210_supplemental_material_legends.docx]

**List of Supplementary Materials**

Supplementary files including Figures S1-6, Tables S1-11, Appendix 1, and materials S12-1
