# Supplementary material for: Olfactory receptor subgenome and expression in a highly olfactory procellariiform seabird
Source: Oxford University Press journal article supplement (doi:10.1093/genetics/iyab210), 2021-10-04
Supplement: iyab210_supplementary_supplementary_materials.pdf [file iyab210_supplementary_supplementary_materials.pdf]

Supplementary materials for “Olfactory receptor subgenome and expression in a highly olfactory procellariiform seabird”

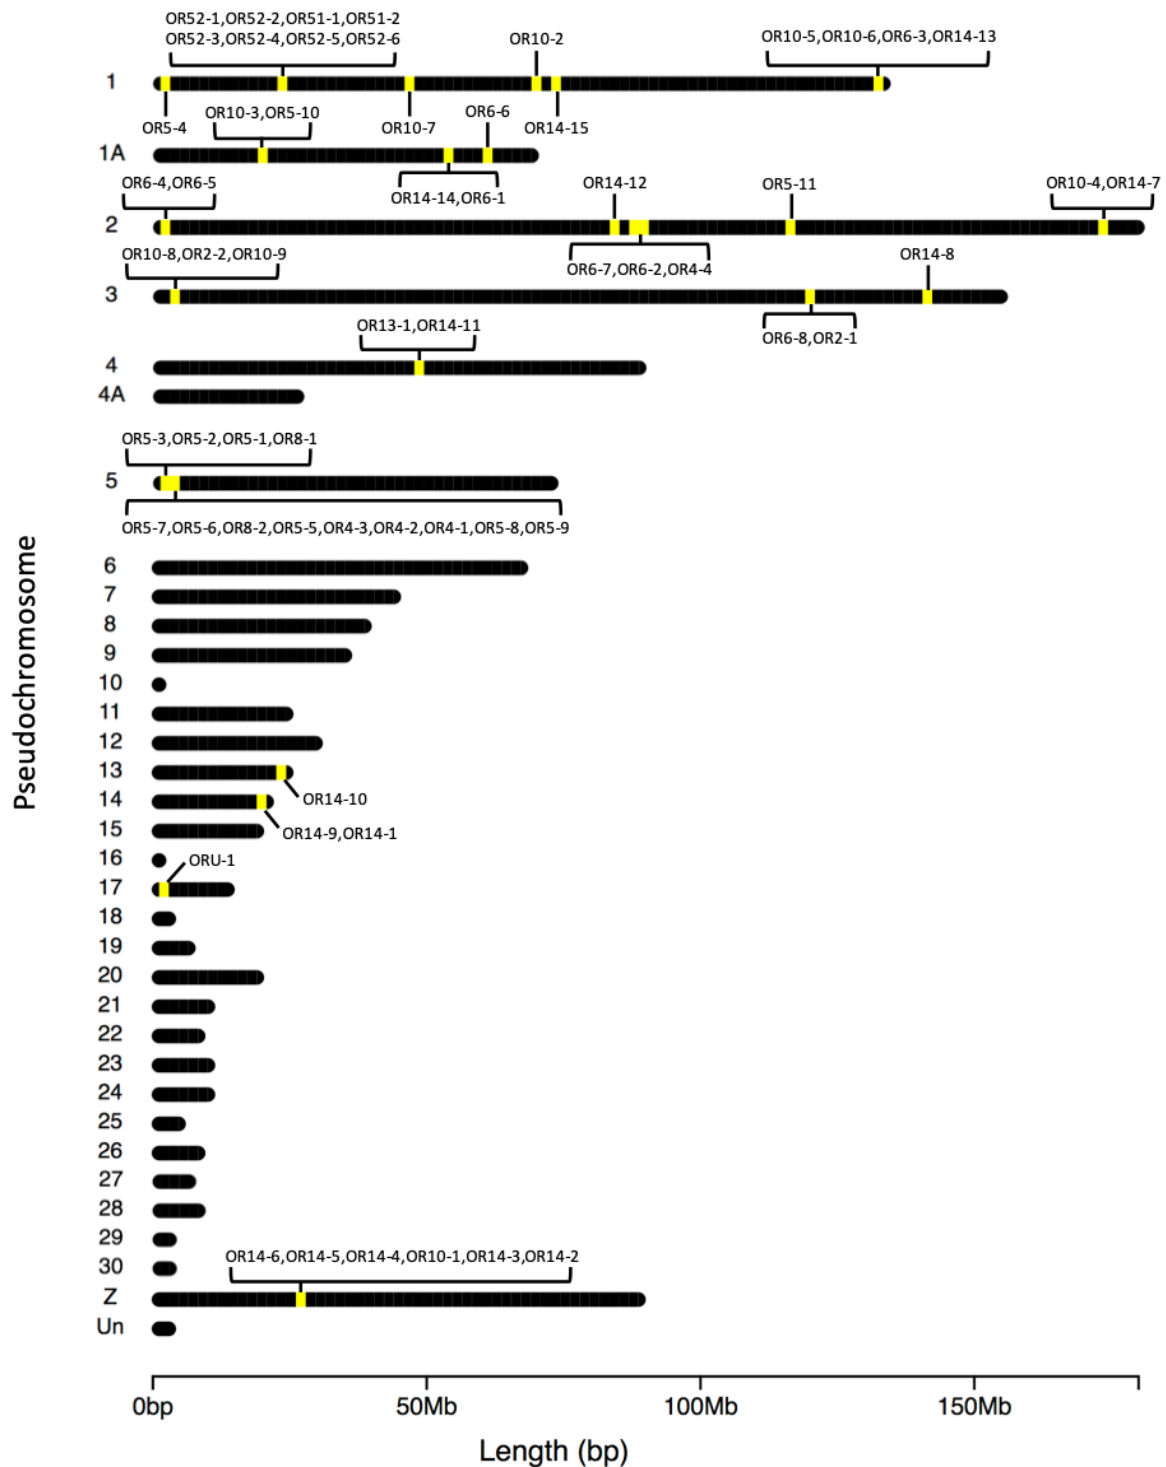

Figure S1. Genomic locations of OR genes on pseudo-chromosomes of the Leach's storm-petrel. Un indicates unplaced scaffolds.

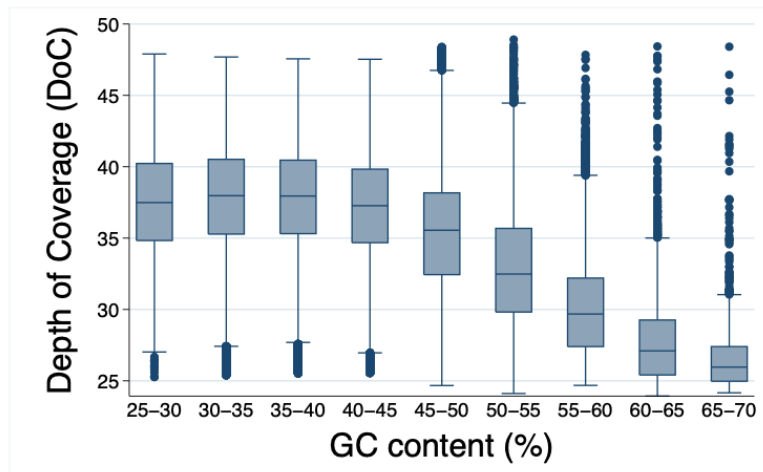

**Figure S2. The Depth of Coverage (DoC) for bins of varying GC content.**

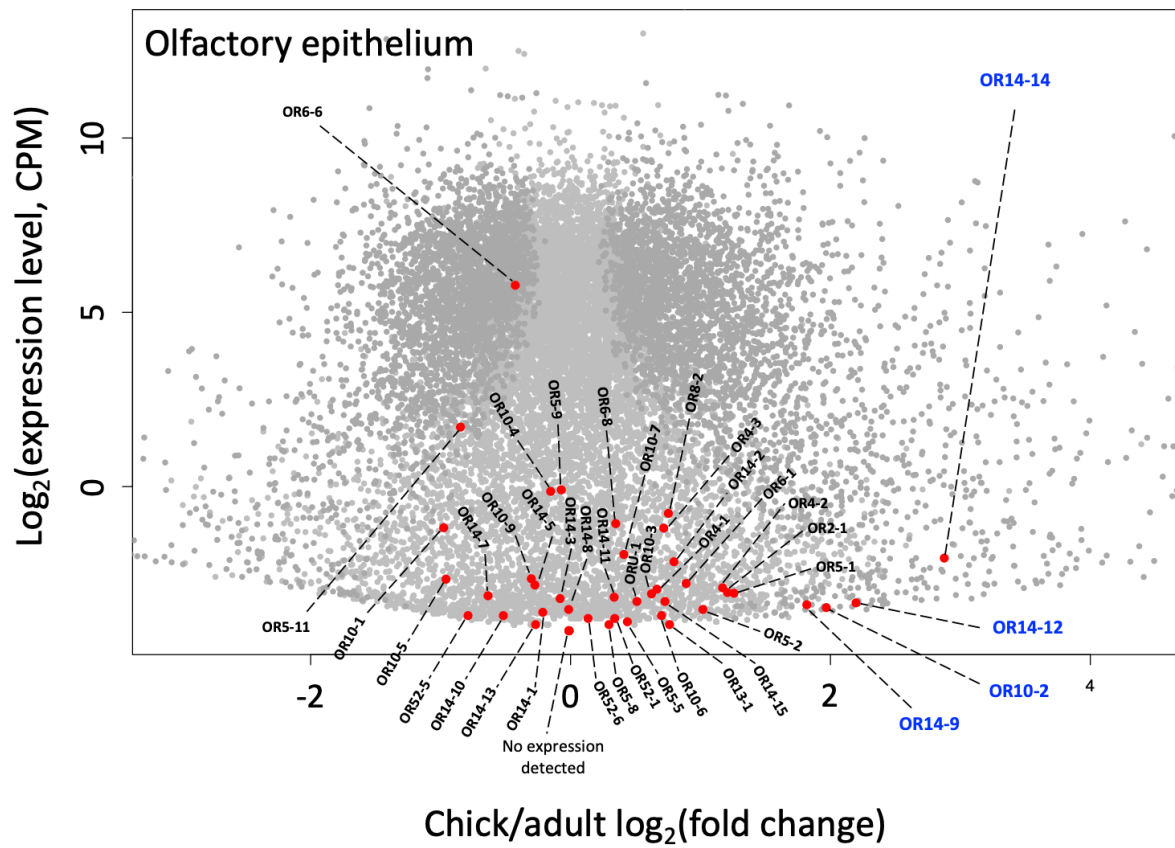

**Figure S3. Differential expression of the genes in chick versus adult olfactory epithelium.** Differentially expressed genes are in dark grey. OR genes are highlighted in red. Four OR genes with higher expression in chicks are labelled with their names in blue. Other OR genes are also labelled. Expression level is in counts per million (CPM).

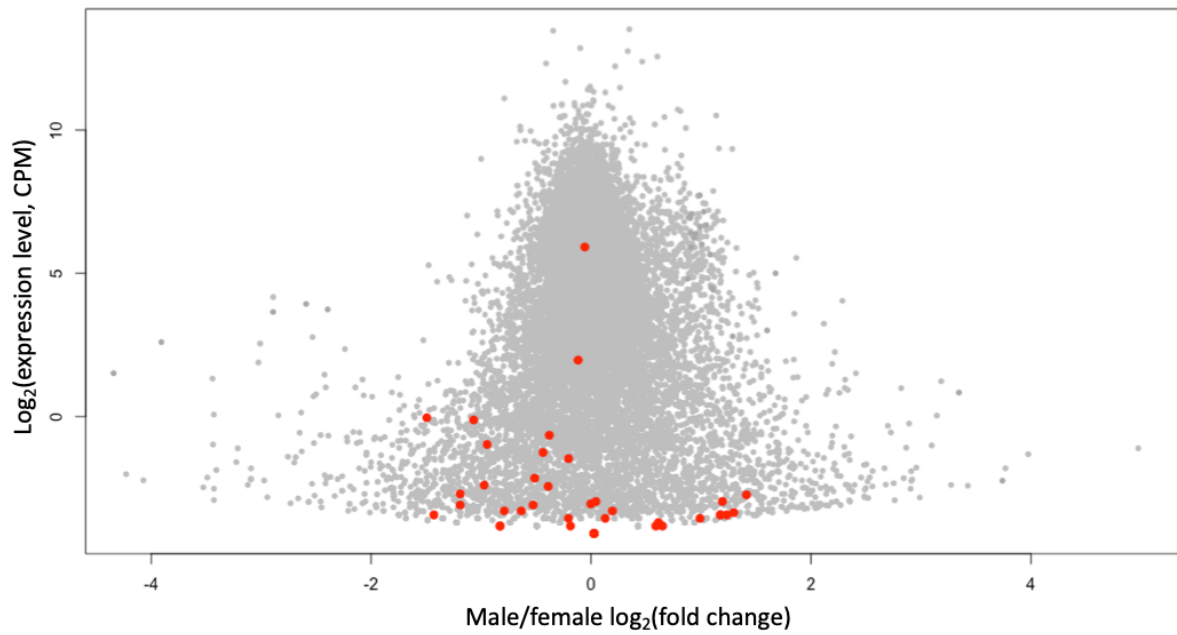

**Figure S4. Differential expression of the genes in adult male versus female olfactory epithelium of the Leach's storm-petrel.** Differentially expressed genes are in dark grey. OR genes are highlighted in red. No OR genes were differentially expressed between adult males and females. Expression level is in counts per million (CPM).

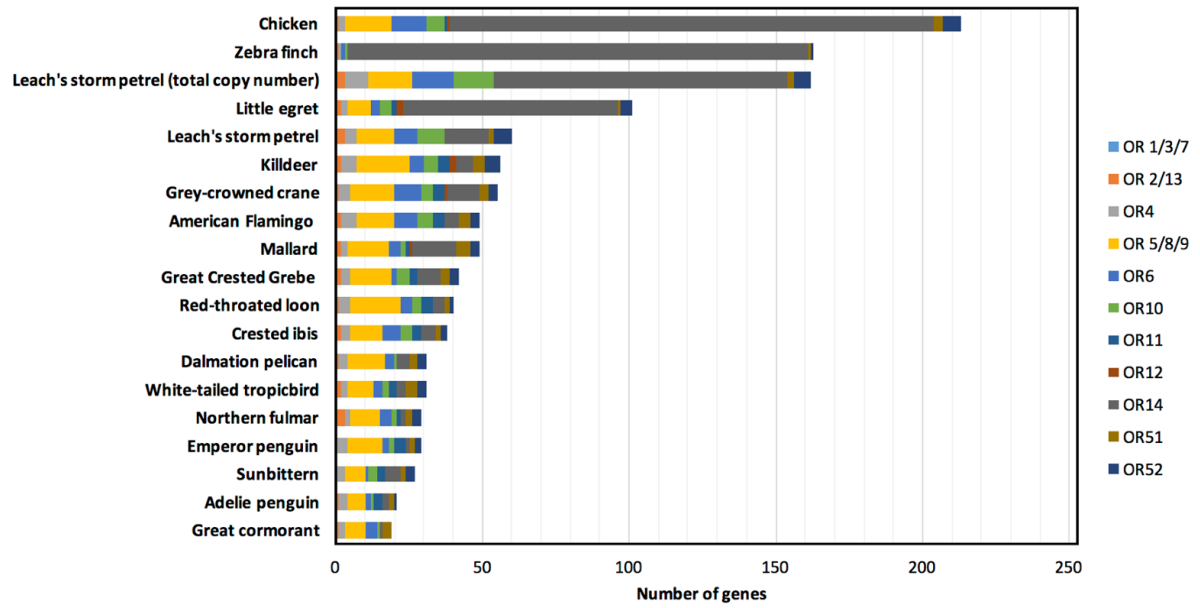

**Figure S5. The number of intact OR genes partitioned by OR gene families in waterbirds, chicken, and zebra finch.** Both the OR gene number estimations based on genome annotation and depth-of-coverage-assisted counting method (total copy number) in the Leach's storm-petrel are shown. The numbers for all species except the Leach's storm-petrel are from Khan *et al.* (1).

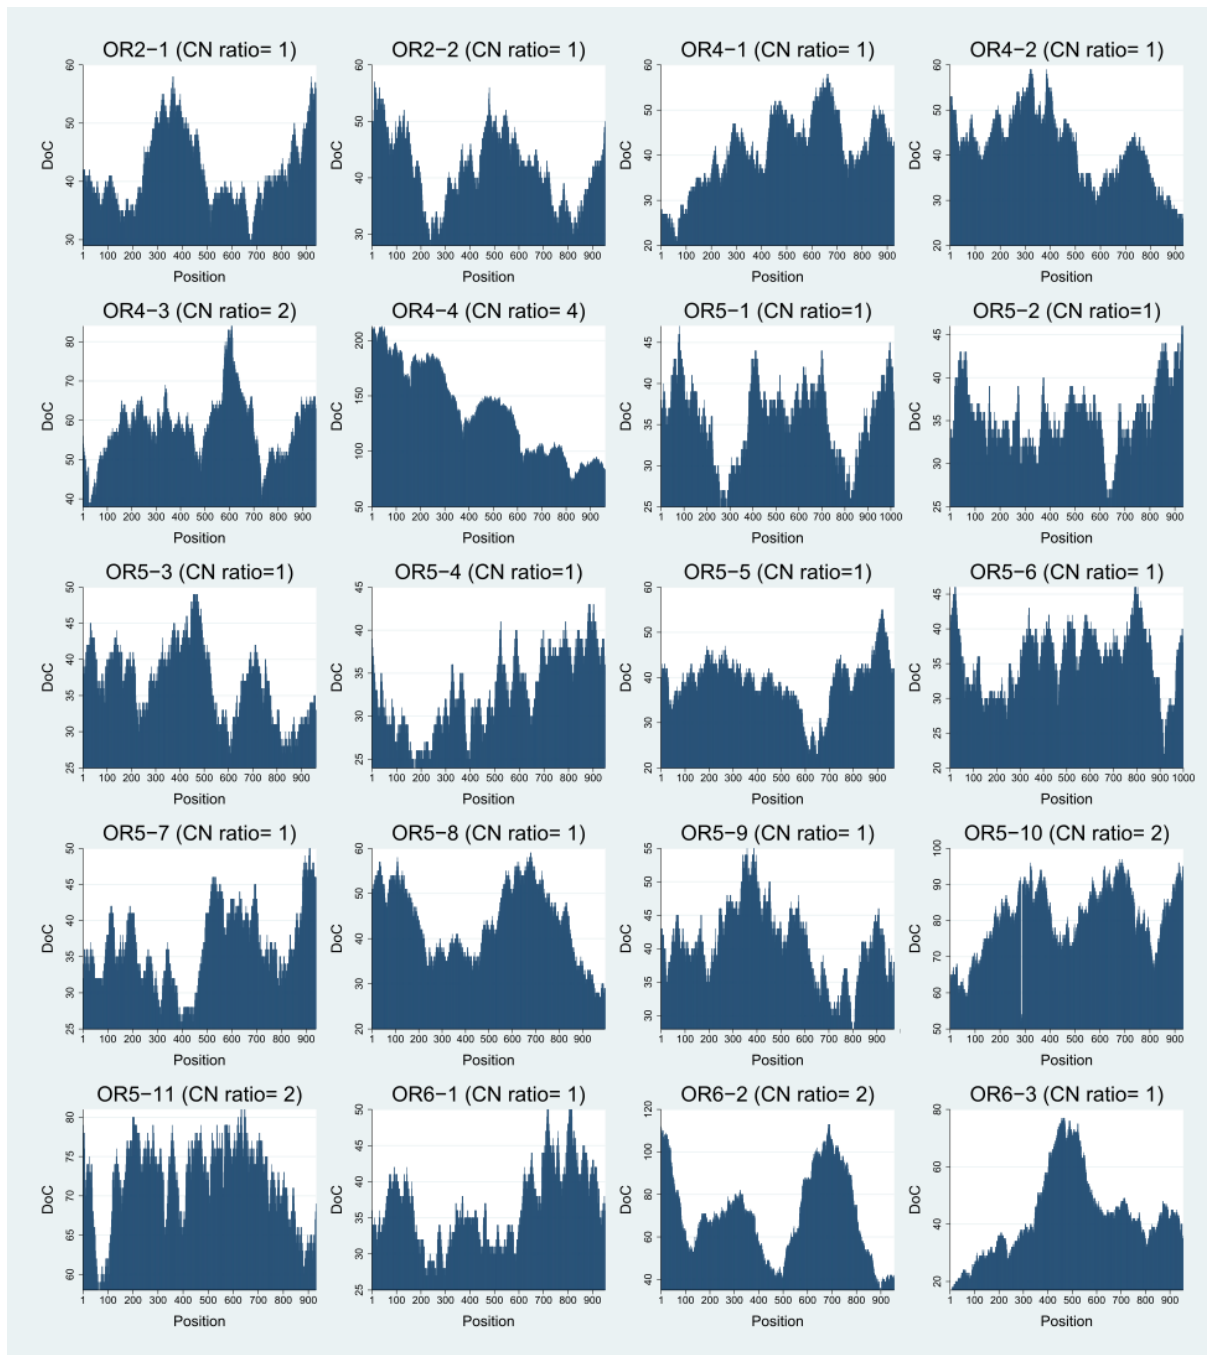

**Figure S6** Depth of coverage (DoC) of mapped reads (y-axis) plotted against the sequence position (x-axis) for each intact olfactory receptor gene identified in the Leach’s storm petrel. Sequence numbering begins at ‘1’ (the first position in the coding region of intact OR genes), and storm petrel OR10-8 and OR10-9 (with few/no mapped reads) are omitted. Individual plots are drawn for each locus, with the locus name and copy number ratio (CN ratio) estimated from comparison of mean DoC to genome-wide averages for regions of similar GC-content indicated at the top of each plot.

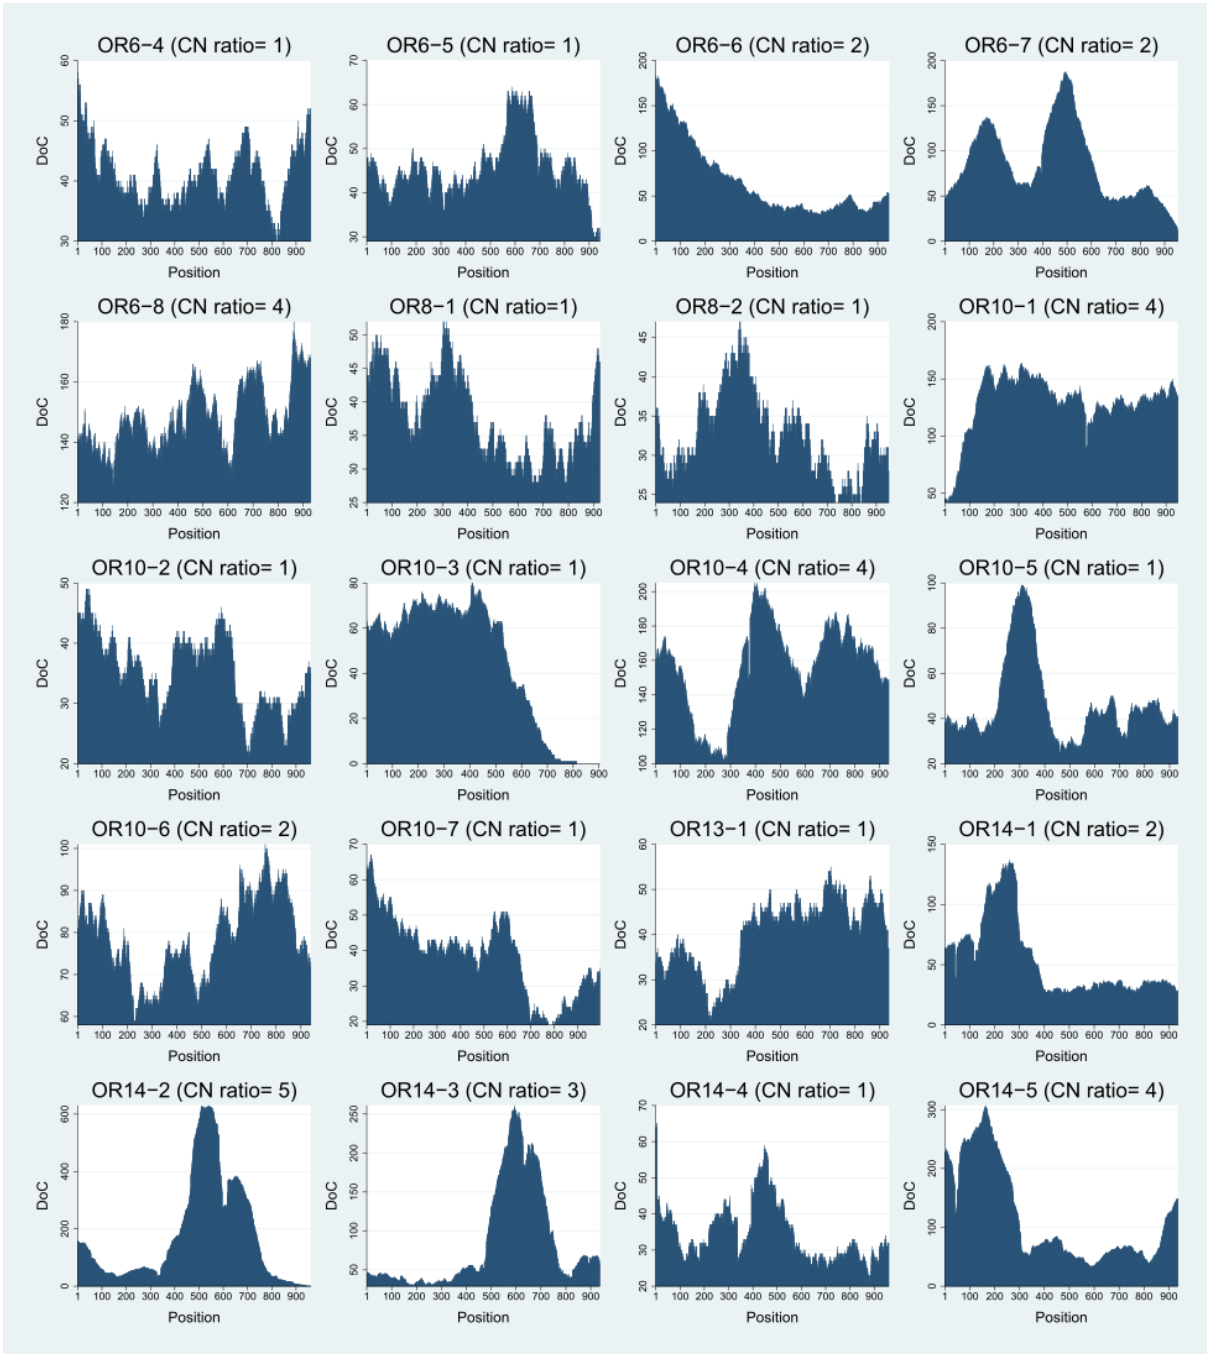

Figure S6 (continued)

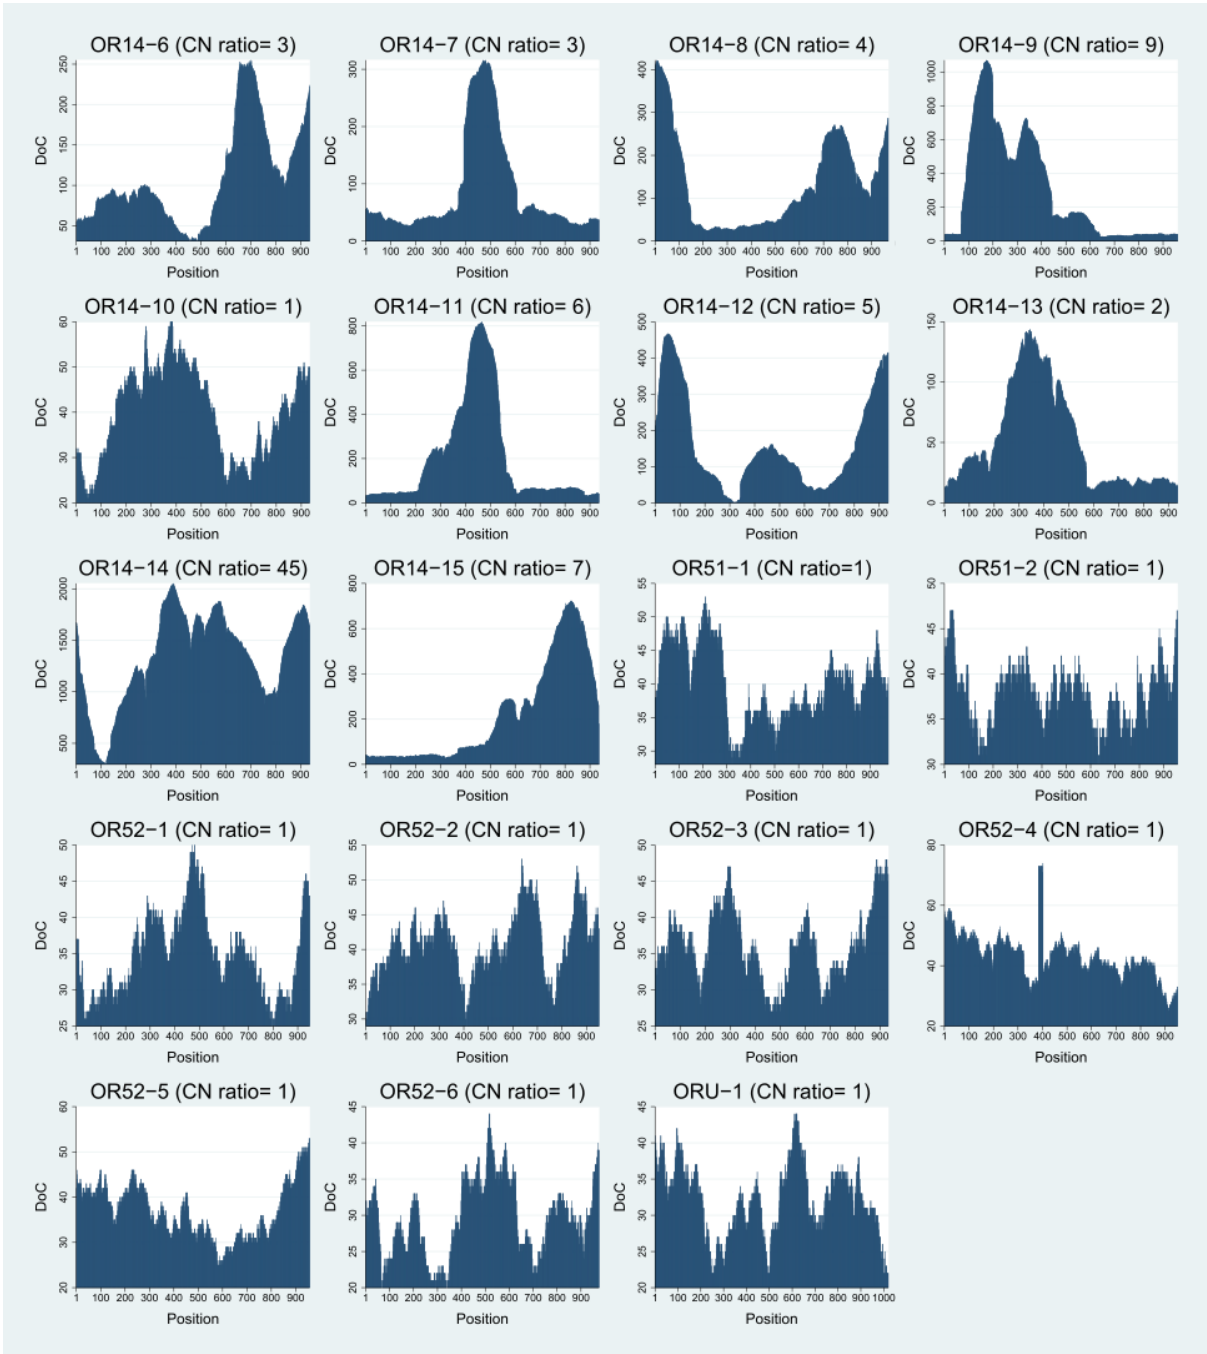

Figure S6 (continued)



**Table S1** Information on tissues of Leach's storm-petrel sampled in this study.

| MCZ <sup>C</sup><br>accession no. | Sampling<br>date | Age class | Sex             | Tissue type                                                                                       | Dataset <sup>A</sup>                  |
|-----------------------------------|------------------|-----------|-----------------|---------------------------------------------------------------------------------------------------|---------------------------------------|
| Cryo149685                        | 2 Sep 2015       | Adult     | F               | Brain, olfactory concha                                                                           | DE                                    |
| Cryo149686                        | 2 Sep 2015       | Adult     | M               | Brain, olfactory concha, muscle,<br>liver, heart, small intestine,<br>kidney, tongue, eye, testes | DE, transcriptome<br>assembly, TopHat |
| Cryo149687                        | 2 Sep 2015       | Adult     | M               | Brain, olfactory concha<br>Stomach                                                                | DE<br>TopHat                          |
| Cryo149688                        | 3 Sep 2015       | Chick     | M? <sup>B</sup> | Brain, olfactory concha                                                                           | DE                                    |
| Cryo149689                        | 3 Sep 2015       | Adult     | F               | Brain, olfactory concha                                                                           | DE                                    |
| Cryo149690                        | 3 Sep 2015       | Adult     | M               | Brain, olfactory concha                                                                           | DE                                    |
| Cryo149691                        | 4 Sep 2015       | Chick     | M? <sup>B</sup> | Brain, olfactory concha                                                                           | DE                                    |
| Cryo149692                        | 4 Sep 2015       | Adult     | F               | Brain, olfactory concha<br>Ovary                                                                  | DE<br>TopHat                          |
| Cryo149693                        | 5 Sep 2015       | Chick     | M               | Brain, olfactory concha<br>Spleen                                                                 | DE<br>TopHat                          |

<sup>A</sup> DE: Differential expression analysis.

<sup>B</sup> Gonad too small to be certain.

<sup>C</sup> Museum of Comparative Zoology, Harvard University.

**Table S2** Intact OR amino acid query sequences.

| Species                  | Species name                      | No. of intact OR genes | Reference                   |
|--------------------------|-----------------------------------|------------------------|-----------------------------|
| Chicken                  | <i>Gallus gallus</i>              | 266                    | (2)                         |
| Zebra finch              | <i>Taeniopygia guttata</i>        | 290                    | (2)                         |
| American alligator       | <i>Alligator mississippiensis</i> | 465                    | (2)                         |
| Saltwater crocodile      | <i>Crocodylus porosus</i>         | 592                    | (2)                         |
| Indian gharial           | <i>Gavialis gangeticus</i>        | 597                    | (2)                         |
| Burmese python           | <i>Python bivittatus</i>          | 481                    | (2)                         |
| Green anole              | <i>Anolis carolinensis</i>        | 108                    | (2)                         |
| Painted turtle           | <i>Chrysemys picta</i>            | 842                    | (2)                         |
| Chinese softshell turtle | <i>Pelodiscus sinensis</i>        | 1180                   | (2)                         |
| Xenopus                  | <i>Xenopus tropicalis</i>         | 824                    | (3)                         |
| Zebrafish                | <i>Danio rerio</i>                | 154                    | (3)                         |
| Human                    | <i>Homo sapiens</i>               | 388                    | HORDE database <sup>A</sup> |

<sup>A</sup> HORDE database (build #44 2 Dec 2015, accessed Oct 24, 2018)

**Table S3** Species included for phylogenetic analysis.

| Species                 | Species name                      | Reference  |
|-------------------------|-----------------------------------|------------|
| American alligator      | <i>Alligator mississippiensis</i> | (2)        |
| Green anole             | <i>Anolis carolinensis</i>        | (2)        |
| Chicken                 | <i>Gallus gallus</i>              | (2)        |
| Zebra finch             | <i>Taeniopygia guttata</i>        | (2)        |
| Northern fulmar         | <i>Fulmarus glacialis</i>         | (4)        |
| Emperor penguin         | <i>Aptenodytes forsteri</i>       | (4)        |
| Adelie penguin          | <i>Pygoscelis adeliae</i>         | (4)        |
| Great cormorant         | <i>Phalacrocorax carbo</i>        | (4)        |
| Crested ibis            | <i>Nipponia nippon</i>            | (4)        |
| Little egret            | <i>Egretta garzetta</i>           | (4)        |
| Dalmatian pelican       | <i>Pelecanus crispus</i>          | (4)        |
| Red-throated loon       | <i>Gavia stellata</i>             | (4)        |
| White-tailed tropicbird | <i>Phaethon lepturus</i>          | (4)        |
| Sunbittern              | <i>Eurypyga helias</i>            | (4)        |
| Killdeer                | <i>Charadrius vociferus</i>       | (4)        |
| Grey-crowned crane      | <i>Balearica regulorum</i>        | (4)        |
| Mallard                 | <i>Anas platyrhynchos</i>         | (4)        |
| Leach's storm-petrel    | <i>Oceanodroma leucorhoa</i>      | This study |

**Table S4** Assembly statistics for Leach's storm-petrel genome.

|                                    | Leach's storm-petrel genome |
|------------------------------------|-----------------------------|
| Estimated genome size              | 1.24 Gb                     |
| %GC content                        | 42.1                        |
| Total depth of coverage            | 80x                         |
| Total contig length (bp)           | 1,181,786,487               |
| Total scaffold length (bp, gapped) | 1,195,165,757               |
| Number of contigs                  | 17396                       |
| Contig N50 (bp)                    | 165.4 kb                    |
| Number of scaffolds                | 1697                        |
| Scaffold N50 (with gaps)           | 8.7 Mb                      |
| Total BUSCOs                       | 4817/4915 (98.0%)           |
| Complete BUSCOs                    | 4654/4915 (94.7%)           |

**Table S5** Copy number ratio of intact OR genes in the Leach's storm-petrel.

| OR ID   | OR family | Scaffold number | Scaffold length | Start position | End position | Copy number ratio | (+/- 2SD) <sup>A</sup> |
|---------|-----------|-----------------|-----------------|----------------|--------------|-------------------|------------------------|
| OR2-1   | OR2       | 373             | 42447           | 22343          | 23281        | 1                 | (0.9-1.4)              |
| OR2-2   | OR2       | 75              | 5450577         | 124020         | 124970       | 1                 | (1.0-1.7)              |
| OR4-1   | OR4       | 267             | 245379          | 38837          | 39763        | 1                 | (1.0-1.7)              |
| OR4-2   | OR4       | 267             | 245379          | 44800          | 45729        | 1                 | (0.9-1.4)              |
| OR4-3   | OR4       | 267             | 245379          | 49579          | 50532        | 2                 | (1.3-2.1)              |
| OR4-4   | OR4       | 300             | 133585          | 91777          | 92736        | 4                 | (3.1-4.7)              |
| OR5-1   | OR5       | 158             | 1660507         | 1639261        | 1640274      | 1                 | (0.9-1.5)              |
| OR5-10  | OR5       | 338             | 95658           | 51028          | 51960        | 2                 | (1.8-2.8)              |
| OR5-11  | OR5       | 378             | 41666           | 3678           | 4607         | 2                 | (1.7-2.7)              |
| OR5-2   | OR5       | 158             | 1660507         | 1644012        | 1644944      | 1                 | (0.9-1.5)              |
| OR5-3   | OR5       | 158             | 1660507         | 1655196        | 1656155      | 1                 | (0.9-1.5)              |
| OR5-4   | OR5       | 182             | 1123554         | 991888         | 992835       | 1                 | (1.0-1.5)              |
| OR5-5   | OR5       | 235             | 449237          | 423258         | 424226       | 1                 | (1.0-1.6)              |
| OR5-6   | OR5       | 235             | 449237          | 432355         | 433353       | 1                 | (0.9-1.5)              |
| OR5-7   | OR5       | 235             | 449237          | 438649         | 439587       | 1                 | (0.9-1.5)              |
| OR5-8   | OR5       | 267             | 245379          | 23268          | 24263        | 1                 | (1.0-1.6)              |
| OR5-9   | OR5       | 27              | 11256205        | 11240716       | 11241687     | 1                 | (0.9-1.5)              |
| OR6-1   | OR6       | 293             | 139987          | 31957          | 32907        | 1                 | (0.8-1.3)              |
| OR6-2   | OR6       | 300             | 133585          | 5445           | 6398         | 2                 | (1.6-2.4)              |
| OR6-3   | OR6       | 359             | 52130           | 38736          | 39689        | 1                 | (1.0-1.5)              |
| OR6-4   | OR6       | 409             | 29924           | 8476           | 9435         | 1                 | (0.9-1.4)              |
| OR6-5   | OR6       | 409             | 29924           | 24170          | 25111        | 1                 | (1.0-1.6)              |
| OR6-6   | OR6       | 480             | 21778           | 14483          | 15427        | 2                 | (1.5-2.3)              |
| OR6-7   | OR6       | 485             | 19036           | 201            | 1154         | 2                 | (1.9-2.9)              |
| OR6-8   | OR6       | 578             | 11286           | 3830           | 4759         | 4                 | (3.3-5.1)              |
| OR8-1   | OR8       | 158             | 1660507         | 1631284        | 1632207      | 1                 | (0.9-1.5)              |
| OR8-2   | OR8       | 235             | 449237          | 427586         | 428536       | 1                 | (0.9-1.4)              |
| OR10-1  | OR10      | 274             | 226073          | 128330         | 129277       | 4                 | (3.0-4.8)              |
| OR10-2  | OR10      | 297             | 126640          | 65519          | 66478        | 1                 | (0.8-1.2)              |
| OR10-3  | OR10      | 338             | 95658           | 76892          | 77794        | 1                 | (1.0-1.5)              |
| OR10-4  | OR10      | 345             | 61266           | 2418           | 3353         | 4                 | (3.6-5.8)              |
| OR10-5  | OR10      | 396             | 40047           | 4694           | 5626         | 1                 | (1.1-1.7)              |
| OR10-6  | OR10      | 463             | 21626           | 16656          | 17594        | 2                 | (1.9-3.2)              |
| OR10-7  | OR10      | 49              | 7629941         | 6884893        | 6885885      | 1                 | (0.9-1.6)              |
| OR10-8  | OR10      | 75              | 5450577         | 115075         | 116013       | 0 <sup>B</sup>    | (0.0-0.0)              |
| OR10-9  | OR10      | 75              | 5450577         | 130763         | 131701       | 0 <sup>B</sup>    | (0.0-0.1)              |
| OR13-1  | OR13      | 380             | 41223           | 13999          | 14934        | 1                 | (0.9-1.5)              |
| OR14-1  | OR14      | 263             | 246623          | 186713         | 187648       | 2                 | (1.3-2.2)              |
| OR14-10 | OR14      | 444             | 24419           | 12615          | 13547        | 1                 | (1.0-1.6)              |
| OR14-11 | OR14      | 482             | 19059           | 9009           | 9944         | 6                 | (4.9-8.2)              |
| OR14-12 | OR14      | 507             | 17189           | 13641          | 14576        | 5                 | (4.0-6.6)              |
| OR14-13 | OR14      | 513             | 16678           | 3768           | 4703         | 2                 | (1.2-2.1)              |
| OR14-14 | OR14      | 554             | 13022           | 9482           | 10417        | 45                | (36.2-58.1)            |
| OR14-15 | OR14      | 581             | 11244           | 4964           | 5899         | 7                 | (5.4-9.1)              |
| OR14-2  | OR14      | 274             | 226073          | 53682          | 54641        | 5                 | (4.3-7.3)              |

|        |                           |     |         |         |         |   |            |
|--------|---------------------------|-----|---------|---------|---------|---|------------|
| OR14-3 | OR14                      | 274 | 226073  | 100514  | 101449  | 3 | (2.1-3.5)  |
| OR14-4 | OR14                      | 274 | 226073  | 149030  | 149989  | 1 | (0.8-1.4)  |
| OR14-5 | OR14                      | 274 | 226073  | 170063  | 170998  | 4 | (2.9-4.8)  |
| OR14-6 | OR14                      | 274 | 226073  | 191110  | 192045  | 3 | (2.7-4.4)  |
| OR14-7 | OR14                      | 325 | 87698   | 16076   | 17011   | 3 | (2.1-3.6)  |
| OR14-8 | OR14                      | 369 | 46204   | 20875   | 21843   | 4 | (3.3-5.5)  |
| OR14-9 | OR14                      | 384 | 39901   | 16443   | 17402   | 9 | (7.2-12.0) |
| OR51-1 | OR51                      | 205 | 852617  | 362423  | 363397  | 1 | (0.9-1.5)  |
| OR51-2 | OR51                      | 205 | 852617  | 369024  | 369980  | 1 | (1.0-1.6)  |
| OR52-1 | OR52                      | 205 | 852617  | 313130  | 314077  | 1 | (0.9-1.4)  |
| OR52-2 | OR52                      | 205 | 852617  | 324416  | 325366  | 1 | (1.1-1.8)  |
| OR52-3 | OR52                      | 205 | 852617  | 376250  | 377182  | 1 | (0.9-1.5)  |
| OR52-4 | OR52                      | 205 | 852617  | 435628  | 436578  | 1 | (1.1-1.8)  |
| OR52-5 | OR52                      | 205 | 852617  | 501313  | 502269  | 1 | (0.9-1.5)  |
| OR52-6 | OR52                      | 205 | 852617  | 528440  | 529414  | 1 | (0.8-1.3)  |
| ORU-1  | unassigned<br>(OR1/2/10?) | 50  | 7562026 | 6143206 | 6144225 | 1 | (0.9-1.4)  |

<sup>A</sup> +/- 2 standard deviations (SD) of the copy number ratio.

<sup>B</sup> Genes that had low coverage close to 0 or no coverage with the 220 bp DNA library. They were conservatively assumed to have a copy number of 1 for all analyses.

**Table S6** Gene ontology (GO) categories enriched among genes significantly differentially expressed (FDR < 0.01) in the olfactory epithelium between chick and adult Leach's storm-petrels. Only the top 40 GO terms are shown.

| GO Term    | Description                                                           | P-value  | FDR q-value <sup>A</sup> | Enrichment <sup>B</sup> | N     | B    | n    | b   |
|------------|-----------------------------------------------------------------------|----------|--------------------------|-------------------------|-------|------|------|-----|
| GO:0030198 | Extracellular matrix organization                                     | 3.03E-31 | 4.51E-27                 | 12.93                   | 12880 | 273  | 146  | 40  |
| GO:0043062 | Extracellular structure organization                                  | 1.67E-30 | 1.24E-26                 | 11.86                   | 12880 | 305  | 146  | 41  |
| GO:0001503 | Ossification                                                          | 1.25E-16 | 6.22E-13                 | 10.84                   | 12880 | 99   | 288  | 24  |
| GO:0030199 | Collagen fibril organization                                          | 1.28E-16 | 4.78E-13                 | 26.39                   | 12880 | 40   | 183  | 15  |
| GO:0032963 | Collagen metabolic process                                            | 1.19E-13 | 3.54E-10                 | 35.4                    | 12880 | 46   | 87   | 11  |
| GO:0032502 | Developmental process                                                 | 4.71E-11 | 1.17E-07                 | 1.81                    | 12880 | 3881 | 193  | 105 |
| GO:0009887 | Animal organ morphogenesis                                            | 1.22E-10 | 2.59E-07                 | 5.68                    | 12880 | 431  | 121  | 23  |
| GO:0001958 | Endochondral ossification                                             | 7.05E-10 | 1.31E-06                 | 17.89                   | 12880 | 25   | 288  | 10  |
| GO:0036075 | Replacement ossification                                              | 7.05E-10 | 1.17E-06                 | 17.89                   | 12880 | 25   | 288  | 10  |
| GO:0030282 | Bone mineralization                                                   | 2.15E-09 | 3.20E-06                 | 22.44                   | 12880 | 42   | 123  | 9   |
| GO:0048856 | Anatomical structure development                                      | 6.15E-09 | 8.34E-06                 | 1.96                    | 12880 | 2660 | 193  | 78  |
| GO:0031214 | Biomaterial tissue development                                        | 1.21E-08 | 1.50E-05                 | 15.4                    | 12880 | 68   | 123  | 10  |
| GO:0007155 | Cell adhesion                                                         | 1.84E-08 | 2.11E-05                 | 2.92                    | 12880 | 687  | 250  | 39  |
| GO:0022610 | Biological adhesion                                                   | 2.30E-08 | 2.45E-05                 | 2.9                     | 12880 | 693  | 250  | 39  |
| GO:0030574 | Collagen catabolic process                                            | 9.40E-08 | 9.34E-05                 | 24.63                   | 12880 | 30   | 122  | 7   |
| GO:0032964 | Collagen biosynthetic process                                         | 1.08E-07 | 1.01E-04                 | 98.7                    | 12880 | 6    | 87   | 4   |
| GO:0009653 | Anatomical structure morphogenesis                                    | 1.61E-07 | 1.41E-04                 | 2.49                    | 12880 | 1180 | 193  | 44  |
| GO:0070208 | Protein heterotrimerization                                           | 3.29E-07 | 2.72E-04                 | 357.78                  | 12880 | 12   | 9    | 3   |
| GO:0002063 | Chondrocyte development                                               | 4.77E-07 | 3.74E-04                 | 26.83                   | 12880 | 20   | 144  | 6   |
| GO:0030500 | Regulation of bone mineralization                                     | 6.42E-07 | 4.79E-04                 | 14.94                   | 12880 | 57   | 121  | 8   |
| GO:0001501 | Skeletal system development                                           | 8.15E-07 | 5.78E-04                 | 13.23                   | 12880 | 147  | 53   | 8   |
| GO:0003433 | Chondrocyte development involved in endochondral bone morphogenesis   | 8.28E-07 | 5.61E-04                 | 172.5                   | 12880 | 4    | 56   | 3   |
| GO:0048513 | Animal organ development                                              | 9.99E-07 | 6.48E-04                 | 2.23                    | 12880 | 1031 | 274  | 49  |
| GO:0001649 | Osteoblast differentiation                                            | 1.74E-06 | 1.08E-03                 | 4.59                    | 12880 | 92   | 519  | 17  |
| GO:0071230 | Cellular response to amino acid stimulus                              | 2.49E-06 | 1.49E-03                 | 12.51                   | 12880 | 58   | 142  | 8   |
| GO:0016043 | Cellular component organization                                       | 2.65E-06 | 1.52E-03                 | 1.2                     | 12880 | 4168 | 1285 | 500 |
| GO:0071840 | Cellular component organization or biogenesis                         | 2.88E-06 | 1.59E-03                 | 1.2                     | 12880 | 4209 | 1285 | 504 |
| GO:0070167 | Regulation of biomaterial tissue development                          | 3.52E-06 | 1.87E-03                 | 12.17                   | 12880 | 70   | 121  | 8   |
| GO:0071229 | Cellular response to acid chemical                                    | 4.10E-06 | 2.11E-03                 | 5.48                    | 12880 | 166  | 184  | 13  |
| GO:0003414 | Chondrocyte morphogenesis involved in endochondral bone morphogenesis | 4.30E-06 | 2.14E-03                 | 12.31                   | 12880 | 17   | 431  | 7   |
| GO:0003422 | Growth plate cartilage morphogenesis                                  | 4.30E-06 | 2.07E-03                 | 12.31                   | 12880 | 17   | 431  | 7   |
| GO:0003429 | Growth plate cartilage chondrocyte morphogenesis                      | 4.30E-06 | 2.00E-03                 | 12.31                   | 12880 | 17   | 431  | 7   |
| GO:0090171 | Chondrocyte morphogenesis                                             | 4.30E-06 | 1.94E-03                 | 12.31                   | 12880 | 17   | 431  | 7   |
| GO:0009888 | Tissue development                                                    | 4.35E-06 | 1.91E-03                 | 10.26                   | 12880 | 478  | 21   | 8   |
| GO:0043588 | Skin development                                                      | 6.50E-06 | 2.77E-03                 | 18.14                   | 12880 | 30   | 142  | 6   |
| GO:0050793 | Regulation of developmental process                                   | 7.45E-06 | 3.09E-03                 | 1.9                     | 12880 | 2033 | 193  | 58  |
| GO:2000145 | Regulation of cell motility                                           | 7.57E-06 | 3.05E-03                 | 2.47                    | 12880 | 718  | 254  | 35  |
| GO:0060536 | Cartilage morphogenesis                                               | 1.04E-05 | 4.09E-03                 | 9.2                     | 12880 | 26   | 431  | 8   |
| GO:0035987 | Endodermal cell differentiation                                       | 1.41E-05 | 5.38E-03                 | 6.1                     | 12880 | 25   | 844  | 10  |
| GO:0050878 | Regulation of body fluid levels                                       | 1.76E-05 | 6.55E-03                 | 2.78                    | 12880 | 287  | 419  | 26  |

<sup>A</sup> 'FDR q-value' is the correction of the above p-value for multiple testing using the Benjamini and Hochberg method (5). Namely, for the *i*th term (ranked according to p-value) the FDR q-value is (p-value \* number of GO terms) / *i*.

<sup>B</sup> Enrichment (N, B, n, b) is defined as follows:

N - is the total number of genes

B - is the total number of genes associated with a specific GO term

n - is the number of genes in the top of the user's input list or in the target set when appropriate

b - is the number of genes in the intersection

Enrichment = (b/n) / (B/N)

**Table S7** Positively selected sites detected by five approaches, along with integrated analysis, in genes of OR families 14, 5 and 6 in the Leach's storm-petrel. The sites detected by two or more methods are in bold and underlined.

| OR family | No. of sequences | Positively selected sites |                                                                                                             |                                                                                                                                                                                            |                   |                                                                                                                                                                                                              |
|-----------|------------------|---------------------------|-------------------------------------------------------------------------------------------------------------|--------------------------------------------------------------------------------------------------------------------------------------------------------------------------------------------|-------------------|--------------------------------------------------------------------------------------------------------------------------------------------------------------------------------------------------------------|
|           |                  | SLAC                      | FEL                                                                                                         | MEME                                                                                                                                                                                       | FUBAR             | Integrative                                                                                                                                                                                                  |
| 14        | 15               | <b><u>4, 107</u></b>      | <b><u>4</u></b> , 38, 99,<br><b><u>107</u></b> , 110,<br>134, <b><u>156</u></b> ,<br><b><u>200, 250</u></b> | <b><u>4</u></b> , 6, 25, 47, 93,<br><b><u>107</u></b> , 154, <b><u>156</u></b> ,<br>172, 182, 183,<br><b><u>200</u></b> , 203, 238,<br><b><u>250</u></b> , 254, 261,<br>306, 307, 311, 312 | <b><u>107</u></b> | <b><u>4</u></b> , 6, 25, 38, 47, 93, 99,<br><b><u>107</u></b> , 110, 134, 154,<br><b><u>156</u></b> , 172, 182, 183,<br><b><u>200</u></b> , 203, 238, <b><u>250</u></b> ,<br>254, 261, 306, 307,<br>311, 312 |
| 5         | 11               | NA                        | <b><u>218</u></b> , 225,<br>307, 329                                                                        | 38, 93, 151, 180,<br>211, <b><u>218</u></b> , 241                                                                                                                                          | NA                | 38, 93, 151, 180, 211,<br><b><u>218</u></b> , 225, 241, 307,<br>329                                                                                                                                          |
| 6         | 8                | NA                        | <b><u>16, 218</u></b>                                                                                       | <b><u>16</u></b> , 191, 202, <b><u>218</u></b> ,<br>274, 289                                                                                                                               | 156               | <b><u>16</u></b> , 156, 191, 202, <b><u>218</u></b> ,<br>274, 289                                                                                                                                            |



## References:

1. I. Khan *et al.*, Olfactory receptor subgenomes linked with broad ecological adaptations in Sauropsida. *Mol. Biol. Evol.* **32**, 2832–2843 (2015).
2. M. Vandewege *et al.*, Contrasting patterns of evolutionary diversification in the olfactory repertoires of reptile and bird genomes. *Genome Biology and Evolution* **8**, 470–480 (2016).
3. Y. Niimura, On the origin and evolution of vertebrate olfactory receptor genes: comparative genome analysis among 23 chordate species. *Genome Biology and Evolution* **1**, 34–44 (2009).
4. E. Jarvis *et al.*, Whole-genome analyses resolve early branches in the tree of life of modern birds. *Science* **346**, 1320–1331 (2014).
5. Y. Benjamini, Y. Hochberg, Controlling the false discovery rate: a practical and powerful approach to multiple testing. *Journal of the Royal statistical society: series B (Methodological)* **57**, 289–300 (1995).

## Appendix 1

### Scripts for bioinformatics analyses.

#### README

##### README DEPTH OF COVERAGE (DoC) ANALYSIS OF OLFACTORY RECEPTOR (OR) GENES IN LEACH'S STORM-PETREL =====

Description: Calculate the depth of coverage (DoC) for each olfactory receptor (OR) gene identified in the petrel genome assembly and compare to genome-wide DoC to determine if any identified ORs represent collapsed gene copies, allowing an estimate of the total expected number of petrel ORs. DoC comparisons are made against a repeatmasked version of the storm-petrel genome assembly, comparing the DoC of each petrel OR gene against the mean DoC for similarly sized (1000 bp) genomic bins with similar GC-content to that petrel OR gene.

Note that scripts were written specifically to calculate olfactory gene DoC in the storm-petrel, and might contain hard-coded paths to input/output files and directories, as well as DoC values calculated specifically for the storm-petrel.

##### ----- READ MAPPING & POST-PROCESSING OF MAPPED READS -----

Only the 220bp fragment libraries were used for DoC analyses, but data from both the rapid run & high output run were used.

1. Reads were trimmed with Trimmomatic v. 0.32 with options:  
ILLUMINACLIP:adapters.fa:2:30:10:1<:true
2. Trimmed reads were mapped with BWA v. 0.7.15 and default parameters, with separate jobs run for paired (1P/2P) and unpaired (1U/2U) reads.

First, a BWA index was built for the (non-repeatmasked) storm-petrel genome assembly:

```
bwa index LESP.fasta
```

Then, reads were mapped to the genome assembly (with read group specified) e.g.:

```
bwa mem /path/to/LESP_genome/bwa_index/LESP.fasta -t 8 \  
-R '@RG\tID:C57WP.5\tPL:ILLUMINA\tPU:C57WPANXXCGATGT.5\tSM:LESP\tLB:LESP_CGATGT_220bp' \  
LESP_CGATGT_highoutput_220bp_trimmed_1P.fastq.gz LESP_CGATGT_highoutput_220bp_trimmed_2P.fastq.gz \  
> LESP_highoutput_PE.sam
```

3. SAMtools v. 1.5 was used to post-process mapped reads and merge output BWA SAM files.  
Example workflow:

- a) Convert each BWA output SAM -> BAM, omitting unmapped reads and setting a minimum mapping quality (MAPQ= 30):

```
samtools view -bh -F 4 -q 30 file1.bam file1.sam  
samtools view -bh -F 4 -q 30 file2.bam file2.sam ...etc. for each sam file
```

- b) Coordinate sort each BAM file from previous step:

```
samtools sort -O bam -o file1.sorted.bam file1.bam  
samtools sort -O bam -o file2.sorted.bam file2.bam ...etc. for each bam file from step above
```

- c) Merge all BAM files:

```
samtools merge LESP_merged.bam file1.sorted.bam file2.sorted.bam ...etc. (list all sorted bam files)
```

- d) Resort the merged BAM file:

```
samtools sort -O bam -o LESP_merged.sorted.bam LESP_merged.bam
```

4. Duplicates were marked and removed with Picard v. 2.18.9

```
java -Xmx16g -jar /path/to/picard_2.18.9/picard.jar MarkDuplicates I=LESP_merged.sorted.bam \
O=LESP_nodupes.bam M=LESP_marked_dup_metrics.txt REMOVE_DUPLICATES=true
```

---

#### CALCULATING MEAN DoC OF OLFACTORY RECEPTOR GENES

---

1. Per-base depth of coverage was output from the de-duplicated mapped reads with BEDTools v. 2.26.0 genomecov option:

```
bedtools genomecov -d -ibam LESP_nodupes.bam -g /path/to/LESP_genome/LESP.fasta \
> LESP_bedtools_genomecov
```

2. The BEDTools 'genomecov' output file was split into per-scaffold files with a custom Perl script:

Script: write\_scaffold\_DoC.pl

Takes as input the 'LESP\_bedtools\_genomecov' file output in Step 1 above, and outputs a new directory called 'scaffold\_DoC/' that contains one tab-delimited text file with DoC values for each scaffold

3. RepeatMasker v. 4.0.5 with RepeatMasker Library 'Complete Database 20160829' and query species 'vertebrata metazoa' was used to RepeatMask the storm petrel reference genome assembly:

```
RepeatMasker -pa 8 -x -species 'vertebrata metazoa' -dir RepeatMasker/ LESP.fasta
```

4. A custom Perl script was used to split non-repetitive regions of the repeatmasked reference storm-petrel genome assembly into 'bins' of 1000 bp and to calculate the GC-content (%GC) of each of these bins.

Script: write\_DoC\_bins.pl

Takes as input the repeatmasked version of the petrel genome assembly output from Step 3 above ('LESP.fasta.masked'), and outputs a BED-format file ('LESP\_DoC\_bins\_raw.bed') with an entry for each genomic bin. Only genomic bins with  $\geq 980$  'called' ACGT bases are considered, and the ID field for each entry contains an indexed bin number followed by the %GC for that bin.

5. BEDTools v. 2.26.0 was used to omit any bins that overlap with predicted petrel OR genes (specified in a BED-format file 'LESP\_OR\_genes.bed'):

```
subtractBed -A -a LESP_DoC_bins_raw.bed -b LESP_OR_genes.bed \
> LESP_DoC_bins_final.bed
```

6. A custom Perl script was used to calculate the mean DoC within each genomic bin and to place bins in categories of 5% GC content (e.g. 0-5%, 5-10%, 10-15%, etc.)

Script: calculate\_genomic\_bin\_DoC.pl

Takes as input the 'LESP\_DoC\_bins\_final.bed' BED-format file output in Step 5 above, and the per-scaffold DoC text files output to scaffold\_DoC/ directory output in Step 2 above. Outputs a tab-delimited text file 'LESP\_bins\_summary.txt' that lists the genomic coordinates, %GC, GC-category, and average DoC for each bin.

7. A custom Perl script was used to compare the mean DoC for each storm-petrel OR gene to the mean DoC of genomic bins with similar GC-content to that OR gene (i.e. DoC for an OR gene with 50% GC would be compared to the mean DoC of all genomic bins with 50% GC).

Script: calculate\_petrel\_OR\_DoC.pl

Takes as input: the (non-repeatmasked) petrel genome assembly, a BED-format file listing the genomic coordinates of each petrel OR gene ('LESP\_OR\_genes.bed'), and the text files listing per-base DoC for each scaffold output to scaffold\_DoC directory in Step 2 above. Outputs a tab-delimited text file ('LESP\_OR\_DoC\_summary.txt') that lists summary information for each petrel OR gene, including the average DoC across the gene and a comparison of that DoC value to the mean value for genomic bins with the same GC-content (this ratio is expressed both as a 'raw' value, and also rounded to the nearest integer value).

## write\_scaffold\_DoC.pl

```
#!/usr/bin/perl
use strict;
use warnings;

my $infile= 'LESP_bedtools_genomecov';
open(IN, "<$infile") || die "Cannot open $infile for reading: $!\n";

my $outdir= 'scaffold_DoC/';
unless (-e $outdir){
    mkdir $outdir || die "Cannot create $outdir: $!\n";
}

my $count= 0;
my $stored= "";
while(<IN>){
    chomp($_);
    my @split= split(/\t/, $_);
    my $scaffold= $split[0];
    if ($stored eq $scaffold){
        print OUT "$_\n";
        $count++;
        $stored= $scaffold;
    }
    else{
        close(OUT);
        my $outfile= $outdir . $scaffold;
        open(OUT, ">$outfile") || die "Cannot open $outfile for writing: $!\n";
        print OUT "$_\n";
        $count++;
        $stored= $scaffold;
    }
    if ($count=~ /\d{5}$/){
        print "Processed: $count lines\n";
    }
}
close(IN);
print "\nFinished writing: $count lines\n\n";
```

## write\_DoC\_bins.pl

```
#!/usr/bin/perl
use strict;
use warnings;

use Bio::SeqIO;
use Bio::Seq;

#output file to hold results
my $outfile= 'LESP_DoC_bins_raw.bed';
open(OUT, ">$outfile") || die "Cannot open $outfile for writing: $!\n";

#input file of Repeatmasked genome
my $fasta= 'LESP.fasta.masked';
my $seqio_in= Bio::SeqIO-> new(-file=> $fasta, -format=> 'fasta');

my $count= 0;
my $bins= 0;
my @vals;
while (my $seqobj= $seqio_in-> next_seq()){
    $count++;
    my $id= $seqobj-> display_id();
    print "\nProcessing: $id (count: $count)\n";
    my $len= $seqobj-> length();
    my $stop= $len - 1000;

    #go through scaffold, grabbing 1000 bp at a time
    for (my $i= 1; $i<= $stop; $i= $i + 1000){
        #grab subseq
        my $i2= $i + 999;
        my $subseq= $seqobj-> subseq($i,$i2);
        $subseq= uc($subseq);
        #only keep ACGT
        $subseq=~ s/([ACGT])/g;
        #only proceed if we have min. 980 ACGT characters in subseq
        my $klen= length($subseq);
        if ($klen >= 980){
            #print out this 'bin' to use in DoC calcs.
            #output is bed format, so make start 0-based
            my $start= $i - 1;
            $bins++;

            #calculate %GC for this bin
            my $gc= $subseq;
            $gc=~ s/([GC])/g;
            my $gclen= length($gc);
            my $percgc= ($gclen/$klen)*100;
            $percgc= sprintf("%.1f", $percgc);
            push(@vals, $percgc);

            print OUT "$id\t$start\t$i2\tbin$bins|$percgc\t.\t+\n";
        }
    }
    print "Done! Total bins= $bins\n";
}
close(OUT);
print "\nFinished processing: $count scaffolds\n";
print "Output: $bins bins for DoC calcs.\n";
my @sortedgc= sort {$a <=> $b} (@vals);
my $min= shift(@sortedgc);
my $max= pop(@sortedgc);
print "Min %GC: $min, Max %GC: $max\n\n";
```

## calculate\_genomic\_bin\_DoC.pl

```
#!/usr/bin/perl
use strict;
use warnings;

use Statistics::Basic qw(:all);

#store info. on DoC 'bins' of 1000bp
my $infile= 'LESP_DoC_bins_final.bed';
open(IN, "<$infile") || die "Cannot open $infile for reading: $!\n";

my %bins;
my $count= 0;
print "\nPreparing to process 1 Kb genome 'bins'...\n\n";
while(<IN>){
    chomp($_);
    my @split1= split(/t/, $_);
    my ($scaff1, $start1, $end1, $id1)= ($split1[0], $split1[1], $split1[2], $split1[3]);
    #increment start to be 1-based
    $start1++;
    #parse id
    my @split2= split(/|/, $id1);
    my ($bin1, $gc1)= ($split2[0], $split2[1]);
    #sort %GC into increments of 5% (e.g. 0-5%, 5-10%, etc.)
    my $category;
    for (my $i= 0; $i<= 100; $i= $i + 5){
        my $j= $i+5;
        if (($gc1 >= $i) && ($gc1 < $j)){
            $category= "$i-$j%"
        }
    }
    #store in %bins, keyed by scaffold, then id, with
    #start, end, %GC, and category as values
    $bins{$scaff1}{$bin1}{start}= $start1;
    $bins{$scaff1}{$bin1}{end}= $end1;
    $bins{$scaff1}{$bin1}{gc}= $gc1;
    $bins{$scaff1}{$bin1}{category}= $category;

    $count++;
    if ($count==~/^(d+)(0{4})$/){
        print "Processed: $count\n";
    }
}
close(IN);
print "\nFinished parsing: $count 'bins'\n";

open(OUT, ">LESP_bins_summary.txt") || die "Cannot open outfile for writing: $!\n";
print OUT "ID\tScaffold\tStart\tEnd\t%GC\tCategory\tAvg. DoC\n";

#get the average depth of coverage for each 'bin'
print "Calculating average DoC for each 'bin'...\n";
my $count2= 0;
for my $skey (sort {$a cmp $b} (keys %bins)){
    print "Processing: $skey\n";
    #store all of the DoC values for this scaffold
    my %doc;
    my $infile2= "scaffold_DoC/$skey";
    open(IN2, "<$infile2") || die "Cannot open $infile2 for reading: $!\n";
    print "Storing DoC values...\n";
    while(<IN2>){
        chomp($_);
        my @split3= split(/t/, $_);
        my ($pos3, $depth3)= ($split3[1], $split3[2]);
        $doc{$pos3}= $depth3;
    }
    close(IN2);
    print "Calculating average DoC for each 'bin' on $skey...\n";
    for my $bkey (sort {$a cmp $b} (keys %{$bins{$skey}})){
        my $startval= $bins{$skey}{$bkey}{start};
        my $endval= $bins{$skey}{$bkey}{end};
        my @vals;

        for (my $z= $startval; $z<= $endval; $z++){
```

```
        my $dval= $doc{$z};
        push(@vals, $dval);
    }
    my $avg= mean(\@vals);
    #output info. for this 'bin'
    print OUT
"$bkey\t$skey\t$startval\t$endval\t$bins{$skey}{$bkey}{'gc'}\t$bins{$skey}{$bkey}{'category'}\t$avg\n";

        $count2++;
    }
}
close(OUT);
print "\nFinished calculating average DoC for $count2 'bins' total\n\n";
```

## calculate\_petrel\_OR\_DoC.pl

```
#!/usr/bin/perl
use strict;
use warnings;

use Bio::DB::Fasta;
use Bio::Seq;
use Statistics::Basic qw(:all);
use Math::Round qw(:all);

#outfile to hold results
my $outfile= 'LESP_OR_DoC_summary.txt';
open(OUT, ">$outfile") || die "Cannot open $outfile for writing: $!\n";
print OUT
"ID\tScaffold\tStart\tEnd\tStrand\tLength\tACGT_length\t%GC\tGC_bin\tAvg_DoC\tGC_bin_avg_DoC\tDoC_Ratio\t
DoC_Ratio_integer\n";

#create a Fasta of the petrel genome assembly
my $fasta= "LESP.fasta";
print "\nCreating fastadb of $fasta...\n";
my $fastadb= Bio::DB::Fasta-> new($fasta);
print "Done!\n\n";

#store the mean DoC averaged across all bins within a GC-category
#note: these hard-coded values were specifically determined by averaging across GC-bins
#for the storm-petrel genome
my %genomedoc;
$genomedoc{'25-30%'}= 37.4;
$genomedoc{'30-35%'}= 37.8;
$genomedoc{'35-40%'}= 37.8;
$genomedoc{'40-45%'}= 37.1;
$genomedoc{'45-50%'}= 35.4;
$genomedoc{'50-55%'}= 32.7;
$genomedoc{'55-60%'}= 30.1;
$genomedoc{'60-65%'}= 27.7;
$genomedoc{'65-70%'}= 26.7;

#store info for each petrel OR identified in the genome assembly
my %petrel;
my $orbed= 'LESP_OR_genes.bed';
open(BED, "<$orbed") || die "Cannot open $orbed for reading: $!\n";

my $count1= 0;
print "Storing coordinate info. for petrel ORs...\n";
while(<BED>){
    chomp($_);
    my @split1= split(/\t/, $_);
    my ($scaff1, $start1, $end1, $id1, $strand1)= ($split1[0], $split1[1], $split1[2], $split1[3], $split1[5]);
    #make start 1-based
    $start1++;
    #store keyed by scaffold, then ID
    $petrel{$scaff1}{$id1}{start}= $start1;
    $petrel{$scaff1}{$id1}{end}= $end1;
    $petrel{$scaff1}{$id1}{strand}= $strand1;
    $count1++;
}
close(BED);
print "\nFinished storing info. for: $count1 petrel ORs\n\n";

print "Calculating %GC for each petrel OR...\n";
my @ckvals;
my $count2= 0;
for my $skey (sort {$a cmp $b} (keys %petrel)){
    #retrieve a SeqObject for this scaffold
    my $seqobj= $fastadb-> get_Seq_by_id($skey);
    #for each OR, retrieve the scaffold subsequence & reverse complement if necessary before calculating GC
    for my $ikey (sort {$a cmp $b} (keys %{$petrel{$skey}})){
        my $pos1= $petrel{$skey}{$ikey}{start};
        my $pos2= $petrel{$skey}{$ikey}{end};
        my $strand= $petrel{$skey}{$ikey}{strand};

        my $subseq= $seqobj-> subseq($pos1,$pos2);
        $subseq= uc($subseq);
    }
}

```



```

my $totlen= length($subseq);
$petrel{$skey}{$ikey}{'length'}= $totlen;
if ($strand eq '-') {
    my $tmpobj= Bio::Seq-> new(-id=> 'tmp', -seq=> $subseq, -alphabet=> 'dna');
    $tmpobj= $tmpobj-> revcom();
    $subseq= $tmpobj-> seq();
}

#replace any non-ACGT characters
$subseq=~ s/([^\ACGT])/g;
my $acgtlen= length($subseq);
$petrel{$skey}{$ikey}{'acgt_length'}= $acgtlen;

#calculate %GC
$subseq=~ s/([^\GC])/g;
my $gcrlen= length($subseq);
my $gc= ($gcrlen/$acgtlen)*100;
$gc= sprintf("%.1f", $gc);
$petrel{$skey}{$ikey}{'perc_gc'}= $gc;
push(@ckvals, $gc);

#and, assign this %GC to a 'bin'
my $category;
for (my $i= 0; $i<= 100; $i= $i+5){
    my $j= $i+5;
    if (($gc >= $i) && ($gc < $j)){
        $category= "$i-$j%"
    }
}
$petrel{$skey}{$ikey}{'gc_bin'}= $category;
$count2++;
}
}
print "\nFinished calculating %GC for $count2 petrel ORs\n\n";

my @sorted= sort {$a <=> $b} @ckvals;
my $min= shift(@sorted);
my $max= pop(@sorted);
print "Min %GC= $min, Max %GC= $max\n\n";

#finally, calculate avg. DoC for each petrel OR
print "\nCalculating avg DoC for petrel ORs...\n";
my $total2= 0;
for my $skey2 (sort {$a cmp $b} (keys %petrel)){
    print "Processing ORs on: $skey2\n";
    #store all of the DoC values for this scaffold
    my %doc;
    my $infile= "scaffold_DoC/$skey2";
    open(IN2, "<$infile") || die "Cannot open $infile for reading: $!\n";
    print "Storing DoC values...\n";
    while(<IN2>){
        chomp($_);
        my @split3= split(/t/, $_);
        my ($pos3, $depth3)= ($split3[1], $split3[2]);
        $doc{$pos3}= $depth3;
    }
    close(IN2);
    print "Calculating average DoC for each petrel OR on $skey2...\n";
    for my $ikey2 (sort {$a cmp $b} (keys %{$petrel{$skey2}})){
        my $startval= $petrel{$skey2}{$ikey2}{'start'};
        my $endval= $petrel{$skey2}{$ikey2}{'end'};
        my @vals;

        for (my $z= $startval; $z<= $endval; $z++){
            my $dval= $doc{$z};
            push(@vals, $dval);
        }
        my $avg= mean(\@vals);

        #get the avg DoC for this GC bin
        my $binval= $petrel{$skey2}{$ikey2}{'gc_bin'};
        my $bdoc= $genomedoc{$binval};

        my $ratio2= $avg/$bdoc;
        $ratio2= sprintf("%.1f", $ratio2);

```

```
        my $int2= nearest_ceil(1, $ratio2);
        $total2+=$int2;

        print OUT
"$ikey2\t$skey2\t$startval\t$endval\t$petrel{$skey2}{$ikey2}{strand}\t$petrel{$skey2}{$ikey2}{length}\t \
$petrel{$skey2}{$ikey2}{acgt_length}\t$petrel{$skey2}{$ikey2}{perc_gc}\t$binval\t$avg\t$bdoc\t$ratio2\t$int2\n";
    }
}
close(OUT);
print "Estimated total OR gene content based on GC-bin average DoC= $total2\n\n";
```
