# Supplementary material for: Olfactory receptor subgenome and expression in a highly olfactory procellariiform seabird
Source: Oxford University Press journal article supplement (doi:10.1093/genetics/iyab210), 2021-10-04
Supplement: iyab210_supplementary_table_s8.xlsx [file iyab210_supplementary_table_s8.xlsx]

## Sheet: LESP_OR_DoC_summary_revised
Supplementary Table S8 Copy number ratio of OR genes in the Leach's storm petrel genome.
Category	Temp_OR_ID	Final ID (intact ORs only)	OR family (intact ORs only)	Scaffold	Start	End	Strand	Length	ACGT_length	%GC	OR_gene_mean_DoC	GC_bin	GC_bin_mean_DoC	Mean DoC ratio	Mean DoC ratio integer
Fragmented	allspecies_group87_F			scaffold_300	111890	112354	+	465	465	43.7	41.35	40-45%	37.1	1.1	1
Fragmented	allspecies_group170_F			scaffold_47	8066880	8067131	-	252	252	44.4	37.98	40-45%	37.1	1	1
Fragmented	allspecies_group86_F			scaffold_300	110972	111442	+	471	471	47.6	36.62	45-50%	35.4	1	1
Fragmented	allspecies_group89_F			scaffold_300	117825	118034	-	210	210	48.1	32.59	45-50%	35.4	0.9	1
Fragmented	allspecies_group182_F			scaffold_499	6113	6490	-	378	378	47.6	29.01	45-50%	35.4	0.8	1
Fragmented	allspecies_group185_F			scaffold_510	3757	3921	-	165	165	46.1	35.62	45-50%	35.4	1	1
Fragmented	allspecies_group50_F			scaffold_267	18407	18601	-	195	195	51.8	34.67	50-55%	32.7	1.1	1
Fragmented	allspecies_group159_F			scaffold_444	15313	15837	+	525	522	51.7	36.54	50-55%	32.7	1.1	1
Fragmented	allspecies_group171_F			scaffold_47	8076472	8076818	-	347	347	44.1	46.34	40-45%	37.1	1.2	1
Fragmented	allspecies_group90_F			scaffold_303	21421	21891	-	471	471	49.3	53.37	45-50%	35.4	1.5	2
Fragmented	allspecies_group153_F			scaffold_426	12703	13113	-	411	410	49.3	60.35	45-50%	35.4	1.7	2
Fragmented	allspecies_group212_F			scaffold_205	425836	426096	-	261	261	53.6	37.79	50-55%	32.7	1.2	1
Fragmented	allspecies_group115_F			scaffold_345	15076	15687	-	612	609	50.4	45.55	50-55%	32.7	1.4	1
Fragmented	allspecies_group15_F			scaffold_205	335912	336364	-	453	453	55.2	42.18	55-60%	30.1	1.4	1
Fragmented	allspecies_group211_F			scaffold_31	5267854	5268054	-	201	200	58	38.57	55-60%	30.1	1.3	1
Fragmented	allspecies_group146_F			scaffold_412	25822	26250	+	429	428	52.3	63.59	50-55%	32.7	1.9	2
Fragmented	allspecies_group103_F			scaffold_325	67008	67955	+	948	938	53.7	96.45	50-55%	32.7	2.9	3
Fragmented	allspecies_group139_F			scaffold_402	24802	25011	-	210	208	47.1	134.57	45-50%	35.4	3.8	4
Fragmented	allspecies_group98_F			scaffold_317	58370	58561	-	192	190	51.6	119.77	50-55%	32.7	3.7	4
Fragmented	allspecies_group175_F			scaffold_482	1486	1785	+	300	292	54.8	139.82	50-55%	32.7	4.3	4
Fragmented	allspecies_group97_F			scaffold_317	41467	42414	-	948	948	55.4	242.93	55-60%	30.1	8.1	8
Fragmented,Truncated	allspecies_group123_FT			scaffold_369	5623	6057	-	435	428	54.2	28.31	50-55%	32.7	0.9	1
Fragmented,Truncated	allspecies_group192_FT			scaffold_578	1	342	+	342	341	51.9	48.2	50-55%	32.7	1.5	2
Fragmented,Truncated	allspecies_group152_FT			scaffold_426	11813	12211	-	399	399	47.9	91.19	45-50%	35.4	2.6	3
Intact	allspecies_group64_I	OR10-1	OR10	scaffold_274	128330	129277	+	948	945	49.2	129.8	45-50%	35.4	3.7	4
Intact	allspecies_group82_I	OR10-2	OR10	scaffold_297	65519	66478	+	960	960	44.9	35.43	40-45%	37.1	1	1
Intact	allspecies_group108_I	OR10-3	OR10	scaffold_338	76892	77794	-	903	899	42.5	44.72	40-45%	37.1	1.2	1
Intact	allspecies_group113_I	OR10-4	OR10	scaffold_345	2418	3353	-	936	933	45.6	156.71	45-50%	35.4	4.4	4
Intact	allspecies_group135_I	OR10-5	OR10	scaffold_396	4694	5626	-	933	931	45.1	46.63	45-50%	35.4	1.3	1
Intact	allspecies_group168_I	OR10-6	OR10	scaffold_463	16656	17594	+	939	938	50.3	78.69	50-55%	32.7	2.4	2
Intact	allspecies_group179_I	OR10-7	OR10	scaffold_49	6884893	6885885	+	993	993	50.8	38.53	50-55%	32.7	1.2	1
Intact	allspecies_group202_I	OR10-8	OR10	scaffold_75	115075	116013	-	939	938	42.6	0	40-45%	37.1	0	0
Intact	allspecies_group204_I	OR10-9	OR10	scaffold_75	130763	131701	+	939	939	42.7	2.12	40-45%	37.1	0.1	0
Intact	allspecies_group129_I	OR13-1	OR13	scaffold_380	13999	14934	-	936	936	46.6	40.49	45-50%	35.4	1.1	1
Intact	allspecies_group42_I	OR14-1	OR14	scaffold_263	186713	187648	+	936	936	54	53.75	50-55%	32.7	1.6	2
Intact	allspecies_group158_I	OR14-10	OR14	scaffold_444	12615	13547	+	933	933	53.4	40.07	50-55%	32.7	1.2	1
Intact	allspecies_group176_I	OR14-11	OR14	scaffold_482	9009	9944	+	936	936	53.2	201.51	50-55%	32.7	6.2	6
Intact	allspecies_group184_I	OR14-12	OR14	scaffold_507	13641	14576	+	936	914	53.2	162.92	50-55%	32.7	5	5
Intact	allspecies_group186_I	OR14-13	OR14	scaffold_513	3768	4703	-	936	936	54.8	51.08	50-55%	32.7	1.6	2
Intact	allspecies_group190_I	OR14-14	OR14	scaffold_554	9482	10417	+	936	927	55.2	1341.4	55-60%	30.1	44.6	45
Intact	allspecies_group194_I	OR14-15	OR14	scaffold_581	4964	5899	-	936	935	54.7	221.98	50-55%	32.7	6.8	7
Intact	allspecies_group60_I	OR14-2	OR14	scaffold_274	53682	54641	+	960	936	54	177.85	50-55%	32.7	5.4	5
Intact	allspecies_group63_I	OR14-3	OR14	scaffold_274	100514	101449	-	936	927	54.3	85.19	50-55%	32.7	2.6	3
Intact	allspecies_group66_I	OR14-4	OR14	scaffold_274	149030	149989	-	960	957	53.7	34.74	50-55%	32.7	1.1	1
Intact	allspecies_group67_I	OR14-5	OR14	scaffold_274	170063	170998	+	936	932	53.6	116.85	50-55%	32.7	3.6	4
Intact	allspecies_group69_I	OR14-6	OR14	scaffold_274	191110	192045	-	936	935	53.7	108.92	50-55%	32.7	3.3	3
Intact	allspecies_group101_I	OR14-7	OR14	scaffold_325	16076	17011	-	936	935	54.4	87.51	50-55%	32.7	2.7	3
Intact	allspecies_group124_I	OR14-8	OR14	scaffold_369	20875	21843	-	969	951	54.7	134.1	50-55%	32.7	4.1	4
Intact	allspecies_group131_I	OR14-9	OR14	scaffold_384	16443	17402	-	960	959	53	293.34	50-55%	32.7	9	9
Intact	allspecies_group127_I	OR2-1	OR2	scaffold_373	22343	23281	-	939	939	43.3	42.12	40-45%	37.1	1.1	1
Intact	allspecies_group203_I	OR2-2	OR2	scaffold_75	124020	124970	+	951	951	51	41.87	50-55%	32.7	1.3	1
Intact	allspecies_group52_I	OR4-1	OR4	scaffold_267	38837	39763	-	927	926	53.5	41.46	50-55%	32.7	1.3	1
Intact	allspecies_group53_I	OR4-2	OR4	scaffold_267	44800	45729	-	930	930	44.9	41.77	40-45%	37.1	1.1	1
Intact	allspecies_group54_I	OR4-3	OR4	scaffold_267	49579	50532	-	954	946	47.8	58.46	45-50%	35.4	1.7	2
Intact	allspecies_group85_I	OR4-4	OR4	scaffold_300	91777	92736	-	960	948	43.5	137.34	40-45%	37.1	3.7	4
Intact	allspecies_group6_I	OR5-1	OR5	scaffold_158	1639261	1640274	+	1014	1010	54.8	35.87	50-55%	32.7	1.1	1
Intact	allspecies_group107_I	OR5-10	OR5	scaffold_338	51028	51960	-	933	928	41.6	80.97	40-45%	37.1	2.2	2
Intact	allspecies_group128_I	OR5-11	OR5	scaffold_378	3678	4607	-	930	929	47.8	72.09	45-50%	35.4	2	2
Intact	allspecies_group7_I	OR5-2	OR5	scaffold_158	1644012	1644944	+	933	927	53.9	35.63	50-55%	32.7	1.1	1
Intact	allspecies_group9_I	OR5-3	OR5	scaffold_158	1655196	1656155	-	960	959	52.1	37.01	50-55%	32.7	1.1	1
Intact	allspecies_group10_I	OR5-4	OR5	scaffold_182	991888	992835	+	948	948	62.7	32.89	60-65%	27.7	1.2	1
Intact	allspecies_group37_I	OR5-5	OR5	scaffold_235	423258	424226	+	969	967	50.8	39.23	50-55%	32.7	1.2	1
Intact	allspecies_group39_I	OR5-6	OR5	scaffold_235	432355	433353	-	999	995	51.2	35.89	50-55%	32.7	1.1	1
Intact	allspecies_group40_I	OR5-7	OR5	scaffold_235	438649	439587	-	939	938	53.6	36.64	50-55%	32.7	1.1	1
Intact	allspecies_group51_I	OR5-8	OR5	scaffold_267	23268	24263	-	996	993	45.6	43.86	45-50%	35.4	1.2	1
Intact	allspecies_group57_I	OR5-9	OR5	scaffold_27	11240716	11241687	+	972	971	46.4	41.02	45-50%	35.4	1.2	1
Intact	allspecies_group17_I	OR51-1	OR51	scaffold_205	362423	363397	+	975	974	46.1	40.21	45-50%	35.4	1.1	1
Intact	allspecies_group18_I	OR51-2	OR51	scaffold_205	369024	369980	+	957	957	56.1	37.84	55-60%	30.1	1.3	1
Intact	allspecies_group11_I	OR52-1	OR52	scaffold_205	313130	314077	-	948	948	53.4	34.91	50-55%	32.7	1.1	1
Intact	allspecies_group13_I	OR52-2	OR52	scaffold_205	324416	325366	-	951	950	55.8	40.91	55-60%	30.1	1.4	1
Intact	allspecies_group19_I	OR52-3	OR52	scaffold_205	376250	377182	+	933	932	54.6	36.23	50-55%	32.7	1.1	1
Intact	allspecies_group24_I	OR52-4	OR52	scaffold_205	435628	436578	+	951	951	53	43.31	50-55%	32.7	1.3	1
Intact	allspecies_group31_I	OR52-5	OR52	scaffold_205	501313	502269	-	957	957	51.5	37.07	50-55%	32.7	1.1	1
Intact	allspecies_group33_I	OR52-6	OR52	scaffold_205	528440	529414	-	975	974	58.8	29.64	55-60%	30.1	1	1
Intact	allspecies_group72_I	OR6-1	OR6	scaffold_293	31957	32907	-	951	951	47.5	36.64	45-50%	35.4	1	1
Intact	allspecies_group83_I	OR6-2	OR6	scaffold_300	5445	6398	-	954	951	42.4	70.63	40-45%	37.1	1.9	2
Intact	allspecies_group119_I	OR6-3	OR6	scaffold_359	38736	39689	-	954	951	42.4	43.21	40-45%	37.1	1.2	1
Intact	allspecies_group142_I	OR6-4	OR6	scaffold_409	8476	9435	-	960	960	41.2	41.27	40-45%	37.1	1.1	1
Intact	allspecies_group145_I	OR6-5	OR6	scaffold_409	24170	25111	-	942	942	43.4	45.86	40-45%	37.1	1.2	1
Intact	allspecies_group174_I	OR6-6	OR6	scaffold_480	14483	15427	+	945	943	43.3	65.96	40-45%	37.1	1.8	2
Intact	allspecies_group178_I	OR6-7	OR6	scaffold_485	201	1154	-	954	945	41.4	85.21	40-45%	37.1	2.3	2
Intact	allspecies_group193_I	OR6-8	OR6	scaffold_578	3830	4759	-	930	928	40	148.73	40-45%	37.1	4	4
Intact	allspecies_group5_I	OR8-1	OR8	scaffold_158	1631284	1632207	+	924	922	51.3	37.96	50-55%	32.7	1.2	1
Intact	allspecies_group38_I	OR8-2	OR8	scaffold_235	427586	428536	-	951	950	55.9	32.67	55-60%	30.1	1.1	1
Intact	allspecies_group183_I	ORU-1	unassigned (OR1/2/10?)	scaffold_50	6143206	6144225	-	1020	1018	58.1	32.22	55-60%	30.1	1.1	1
Partial	allspecies_group95_P			scaffold_306	94939	95882	+	944	944	43.5	42.23	40-45%	37.1	1.1	1
Partial	allspecies_group122_P			scaffold_366	22688	23672	-	985	985	41.4	38.31	40-45%	37.1	1	1
Partial	allspecies_group156_P			scaffold_443	4151	5133	-	983	983	42.9	38.51	40-45%	37.1	1	1
Partial	allspecies_group172_P			scaffold_47	8085866	8086813	+	948	948	42.6	37.7	40-45%	37.1	1	1
Partial	allspecies_group1_P			scaffold_108	2976744	2977676	+	933	928	48.2	37.19	45-50%	35.4	1.1	1
Partial	allspecies_group20_P			scaffold_205	380992	381913	+	922	922	49.3	40.69	45-50%	35.4	1.1	1
Partial	allspecies_group99_P			scaffold_318	25390	26348	-	959	958	49.8	35.9	45-50%	35.4	1	1
Partial	allspecies_group111_P			scaffold_341	11914	12891	+	978	978	48.8	40.41	45-50%	35.4	1.1	1
Partial	allspecies_group16_P			scaffold_205	343522	344430	+	909	909	53.7	33.89	50-55%	32.7	1	1
Partial	allspecies_group21_P			scaffold_205	384882	386036	-	1155	1155	53.4	35.66	50-55%	32.7	1.1	1
Partial	allspecies_group32_P			scaffold_205	516934	517877	-	944	940	51.4	35.67	50-55%	32.7	1.1	1
Partial	allspecies_group166_P			scaffold_463	6024	6957	+	934	934	54	16.57	50-55%	32.7	0.5	1
Partial	allspecies_group34_P			scaffold_205	549733	550752	-	1020	1016	56.4	33.8	55-60%	30.1	1.1	1
Partial	allspecies_group205_P			scaffold_75	138283	139147	+	865	865	37.5	50.27	35-40%	37.8	1.3	1
Partial	allspecies_group75_P			scaffold_293	57952	58866	-	915	913	41.7	48.62	40-45%	37.1	1.3	1
Partial	allspecies_group143_P			scaffold_409	17032	17942	+	911	911	45.2	44.62	45-50%	35.4	1.3	1
Partial	allspecies_group165_P			scaffold_453	17773	18741	+	969	968	47.6	67.08	45-50%	35.4	1.9	2
Partial	allspecies_group14_P			scaffold_205	332047	333086	+	1040	1040	50.9	40.75	50-55%	32.7	1.2	1
Partial	allspecies_group22_P			scaffold_205	394981	395774	+	794	794	54.7	41.86	50-55%	32.7	1.3	1
Partial	allspecies_group23_P			scaffold_205	429205	430179	+	975	975	52.9	42.18	50-55%	32.7	1.3	1
Partial	allspecies_group26_P			scaffold_205	446490	447386	-	897	897	50.5	45.52	50-55%	32.7	1.4	1
Partial	allspecies_group28_P			scaffold_205	466864	467884	+	1021	1021	50.6	37.59	50-55%	32.7	1.1	1
Partial	allspecies_group29_P			scaffold_205	480587	481667	+	1081	1081	50.3	38.22	50-55%	32.7	1.2	1
Partial	allspecies_group65_P			scaffold_274	144796	145742	+	947	932	52.6	51.5	50-55%	32.7	1.6	2
Partial	allspecies_group68_P			scaffold_274	186102	187061	-	960	956	53.1	53.81	50-55%	32.7	1.6	2
Partial	allspecies_group79_P			scaffold_294	121379	122286	+	908	908	52.5	45.36	50-55%	32.7	1.4	1
Partial	allspecies_group91_P			scaffold_303	24795	25661	-	867	867	52.8	47.11	50-55%	32.7	1.4	1
Partial	allspecies_group96_P			scaffold_317	22245	23189	+	945	938	54.2	55.88	50-55%	32.7	1.7	2
Partial	allspecies_group100_P			scaffold_325	10662	11721	-	1060	1055	53.1	58.08	50-55%	32.7	1.8	2
Partial	allspecies_group8_P			scaffold_158	1648327	1649273	-	947	944	55.5	35.62	55-60%	30.1	1.2	1
Partial	allspecies_group70_P			scaffold_291	13449	14369	-	921	906	55.6	53.9	55-60%	30.1	1.8	2
Partial	allspecies_group76_P			scaffold_293	68373	69325	-	953	951	41.9	77.52	40-45%	37.1	2.1	2
Partial	allspecies_group105_P			scaffold_338	30790	31754	-	965	957	43.6	76.59	40-45%	37.1	2.1	2
Partial	allspecies_group126_P			scaffold_373	15223	16176	+	954	950	40.2	73.42	40-45%	37.1	2	2
Partial	allspecies_group137_P			scaffold_396	23970	24878	+	909	906	44.8	78.64	40-45%	37.1	2.1	2
Partial	allspecies_group188_P			scaffold_521	5044	6039	+	996	986	43.2	100.96	40-45%	37.1	2.7	3
Partial	allspecies_group93_P			scaffold_306	67316	68347	+	1032	1018	45.7	71.76	45-50%	35.4	2	2
Partial	allspecies_group106_P			scaffold_338	38287	39260	-	974	974	47	70.42	45-50%	35.4	2	2
Partial	allspecies_group112_P			scaffold_343	2391	3334	-	944	941	46.7	80.17	45-50%	35.4	2.3	2
Partial	allspecies_group173_P			scaffold_47	8100817	8101728	-	912	911	52.9	73.97	50-55%	32.7	2.3	2
Partial	allspecies_group189_P			scaffold_547	7276	8157	+	882	879	44.8	125.85	40-45%	37.1	3.4	3
Partial	allspecies_group138_P			scaffold_401	9808	10757	+	950	949	45.1	139.45	45-50%	35.4	3.9	4
Partial	allspecies_group148_P			scaffold_416	13281	14221	-	941	938	47.8	139.03	45-50%	35.4	3.9	4
Partial	allspecies_group141_P			scaffold_409	1000	1937	+	938	926	50.4	115.34	50-55%	32.7	3.5	4
Partial	allspecies_group162_P			scaffold_448	8255	9186	-	932	931	54.4	321.27	50-55%	32.7	9.8	10
Partial,Fragmented	allspecies_group164_PF			scaffold_453	6669	7227	-	559	559	37.6	43.4	35-40%	37.8	1.1	1
Partial,Fragmented	allspecies_group73_PF			scaffold_293	41649	42521	-	873	871	43.5	39.23	40-45%	37.1	1.1	1
Partial,Fragmented	allspecies_group74_PF			scaffold_293	48869	49758	-	890	888	44.1	36.78	40-45%	37.1	1	1
Partial,Fragmented	allspecies_group78_PF			scaffold_293	85125	85301	-	177	177	43.5	34.45	40-45%	37.1	0.9	1
Partial,Fragmented	allspecies_group88_PF			scaffold_300	116280	117018	-	739	739	44.7	36.64	40-45%	37.1	1	1
Partial,Fragmented	allspecies_group94_PF			scaffold_306	81711	82209	+	499	499	43.9	40.26	40-45%	37.1	1.1	1
Partial,Fragmented	allspecies_group213_PF			scaffold_318	30614	30966	-	353	353	41.6	36.98	40-45%	37.1	1	1
Partial,Fragmented	allspecies_group130_PF			scaffold_380	34206	34838	-	633	633	44.7	41.18	40-45%	37.1	1.1	1
Partial,Fragmented	allspecies_group144_PF			scaffold_409	19395	19900	+	506	506	44.1	41.34	40-45%	37.1	1.1	1
Partial,Fragmented	allspecies_group169_PF			scaffold_47	8065634	8066284	-	651	651	43.3	41.86	40-45%	37.1	1.1	1
Partial,Fragmented	allspecies_group206_PF			scaffold_75	140412	141265	+	854	854	41.9	40.7	40-45%	37.1	1.1	1
Partial,Fragmented	allspecies_group36_PF			scaffold_233	221708	222387	-	680	678	49.1	39.49	45-50%	35.4	1.1	1
Partial,Fragmented	allspecies_group77_PF			scaffold_293	77368	78203	-	836	836	45.8	36.99	45-50%	35.4	1	1
Partial,Fragmented	allspecies_group114_PF			scaffold_345	6106	6418	-	313	313	45.4	39.95	45-50%	35.4	1.1	1
Partial,Fragmented	allspecies_group117_PF			scaffold_345	29323	29909	-	587	587	45.8	33.17	45-50%	35.4	0.9	1
Partial,Fragmented	allspecies_group161_PF			scaffold_446	17205	17979	+	775	775	47.5	40.73	45-50%	35.4	1.2	1
Partial,Fragmented	petrel_group208_PF			scaffold_47	7397590	7397832	+	243	243	47.7	35.1	45-50%	35.4	1	1
Partial,Fragmented	allspecies_group59_PF			scaffold_274	4660	5052	+	393	392	53.1	20.36	50-55%	32.7	0.6	1
Partial,Fragmented	allspecies_group132_PF			scaffold_384	27425	28159	-	735	734	52	35.81	50-55%	32.7	1.1	1
Partial,Fragmented	allspecies_group12_PF			scaffold_205	319712	319966	-	255	255	59.2	32.24	55-60%	30.1	1.1	1
Partial,Fragmented	allspecies_group216_PF			scaffold_521	16174	16490	-	317	316	44.6	61.35	40-45%	37.1	1.7	2
Partial,Fragmented	allspecies_group25_PF			scaffold_205	438340	439098	-	759	759	48.4	41.88	45-50%	35.4	1.2	1
Partial,Fragmented	allspecies_group27_PF			scaffold_205	460733	461626	+	894	894	49.1	44.74	45-50%	35.4	1.3	1
Partial,Fragmented	allspecies_group210_PF			scaffold_297	13424	13603	-	180	180	49.4	42.53	45-50%	35.4	1.2	1
Partial,Fragmented	allspecies_group136_PF			scaffold_396	9024	9257	-	234	231	46.3	61.15	45-50%	35.4	1.7	2
Partial,Fragmented	allspecies_group150_PF			scaffold_416	31832	32767	-	936	935	49.8	59.52	45-50%	35.4	1.7	2
Partial,Fragmented	allspecies_group181_PF			scaffold_499	5034	5571	-	538	537	45.8	60.06	45-50%	35.4	1.7	2
Partial,Fragmented	allspecies_group200_PF			scaffold_667	85	891	+	807	806	45.4	48.75	45-50%	35.4	1.4	1
Partial,Fragmented	allspecies_group30_PF			scaffold_205	487857	488623	+	767	767	51.8	41.78	50-55%	32.7	1.3	1
Partial,Fragmented	allspecies_group56_PF			scaffold_27	11233510	11233881	-	372	372	52.2	42.94	50-55%	32.7	1.3	1
Partial,Fragmented	allspecies_group167_PF			scaffold_463	12352	13035	-	684	683	52.1	39.51	50-55%	32.7	1.2	1
Partial,Fragmented	allspecies_group214_PF			scaffold_510	16042	16398	+	357	357	54.1	55.81	50-55%	32.7	1.7	2
Partial,Fragmented	allspecies_group81_PF			scaffold_297	40110	40478	+	369	369	55.3	52.76	55-60%	30.1	1.8	2
Partial,Fragmented	allspecies_group92_PF			scaffold_306	56935	57725	-	791	785	41.1	76.35	40-45%	37.1	2.1	2
Partial,Fragmented	allspecies_group125_PF			scaffold_373	11900	12732	+	833	833	42.4	86.66	40-45%	37.1	2.3	2
Partial,Fragmented	allspecies_group134_PF			scaffold_395	30576	31274	+	699	695	46.8	81.63	45-50%	35.4	2.3	2
Partial,Fragmented	allspecies_group209_PF			scaffold_937	1098	1520	+	423	421	45.4	78.49	45-50%	35.4	2.2	2
Partial,Fragmented	allspecies_group43_PF			scaffold_263	203102	204036	+	935	933	52.8	78.16	50-55%	32.7	2.4	2
Partial,Fragmented	allspecies_group80_PF			scaffold_297	9007	9909	-	903	903	52.5	73.17	50-55%	32.7	2.2	2
Partial,Fragmented	allspecies_group104_PF			scaffold_338	7450	8285	-	836	829	50.2	76.02	50-55%	32.7	2.3	2
Partial,Fragmented	allspecies_group45_PF			scaffold_263	215921	216685	+	765	758	55.5	59.47	55-60%	30.1	2	2
Partial,Fragmented	allspecies_group140_PF			scaffold_402	37545	38310	+	766	764	47.1	110.78	45-50%	35.4	3.1	3
Partial,Fragmented	allspecies_group47_PF			scaffold_263	221512	222402	-	891	888	52.6	115.09	50-55%	32.7	3.5	4
Partial,Fragmented	allspecies_group61_PF			scaffold_274	58414	59243	-	830	824	52.3	122.07	50-55%	32.7	3.7	4
Partial,Fragmented	allspecies_group84_PF			scaffold_300	48657	49456	+	800	798	50.1	133.86	50-55%	32.7	4.1	4
Partial,Fragmented	allspecies_group110_PF			scaffold_341	3232	3524	+	293	293	49.5	168.24	45-50%	35.4	4.8	5
Partial,Fragmented	allspecies_group71_PF			scaffold_293	9119	9572	+	454	450	41.8	195.74	40-45%	37.1	5.3	5
Partial,Fragmented	allspecies_group44_PF			scaffold_263	211512	212245	+	734	733	52.1	289.61	50-55%	32.7	8.9	9
Partial,Fragmented	allspecies_group157_PF			scaffold_444	706	1581	+	876	875	52.5	458.11	50-55%	32.7	14	14
Partial,Fragmented,Truncated	allspecies_group195_PFT			scaffold_591	8221	8746	-	526	523	40.9	74.33	40-45%	37.1	2	2
Partial,Fragmented,Truncated	allspecies_group207_PFT			scaffold_838	2	720	+	719	714	51.3	75.23	50-55%	32.7	2.3	2
Partial,Truncated	allspecies_group196_PT			scaffold_602	9419	10014	+	596	594	53.9	0	50-55%	32.7	0	0
Partial,Truncated	allspecies_group121_PT			scaffold_359	51769	52128	-	360	353	41.6	20.09	40-45%	37.1	0.5	1
Partial,Truncated	allspecies_group191_PT			scaffold_569	6890	7168	-	279	276	45.7	20.57	45-50%	35.4	0.6	1
Partial,Truncated	allspecies_group180_PT			scaffold_499	1	492	+	492	492	44.3	44.07	40-45%	37.1	1.2	1
Partial,Truncated	allspecies_group3_PT			scaffold_1195	1	781	-	781	780	40.8	80.36	40-45%	37.1	2.2	2
Partial,Truncated	allspecies_group120_PT			scaffold_359	42464	43058	+	595	588	44.9	91.03	40-45%	37.1	2.5	3
Partial,Truncated	allspecies_group48_PT			scaffold_267	5260	5970	+	711	710	49.3	134.03	45-50%	35.4	3.8	4
Partial,Truncated	allspecies_group197_PT			scaffold_640	1	788	+	788	785	43.9	188.43	40-45%	37.1	5.1	5
Partial,Truncated	allspecies_group46_PT			scaffold_263	218944	219627	-	684	677	50.5	238.98	50-55%	32.7	7.3	7
Partial,Truncated	allspecies_group163_PT			scaffold_448	20819	21114	-	296	294	55.8	366.44	55-60%	30.1	12.2	12
Truncated	allspecies_group109_T			scaffold_338	81225	81734	-	510	509	44.4	1.46	40-45%	37.1	0	0
Truncated	allspecies_group201_T			scaffold_719	2	367	+	366	366	51.9	0	50-55%	32.7	0	0
Truncated	allspecies_group151_T			scaffold_426	1	198	+	198	198	36.9	25	35-40%	37.8	0.7	1
Truncated	allspecies_group118_T			scaffold_359	34252	34542	-	291	283	41.3	24.15	40-45%	37.1	0.7	1
Truncated	allspecies_group4_T			scaffold_1575	1	648	-	648	648	43.2	63.57	40-45%	37.1	1.7	2
Truncated	allspecies_group149_T			scaffold_416	22840	23577	-	738	717	44.6	62.49	40-45%	37.1	1.7	2
Truncated	allspecies_group208_T			scaffold_838	3435	4370	+	936	933	44.2	52.9	40-45%	37.1	1.4	1
Truncated	allspecies_group198_T			scaffold_657	1378	1596	+	219	218	46.8	46.37	45-50%	35.4	1.3	1
Truncated	allspecies_group177_T			scaffold_482	18186	18953	-	768	768	51.4	39.45	50-55%	32.7	1.2	1
Truncated	allspecies_group155_T			scaffold_437	18605	19150	+	546	543	42.9	76.33	40-45%	37.1	2.1	2
Truncated	allspecies_group199_T			scaffold_657	7429	7896	-	468	468	40.6	89.84	40-45%	37.1	2.4	2
Truncated	allspecies_group102_T			scaffold_325	41819	42211	+	393	392	51.8	69.18	50-55%	32.7	2.1	2
Truncated	allspecies_group133_T			scaffold_395	9834	10661	-	828	826	51.1	64.6	50-55%	32.7	2	2
Truncated	allspecies_group147_T			scaffold_416	647	1099	+	453	448	44	112.78	40-45%	37.1	3	3
Truncated	allspecies_group187_T			scaffold_513	13982	14755	+	774	767	54.5	90.62	50-55%	32.7	2.8	3
Truncated	allspecies_group116_T			scaffold_345	18368	19291	+	924	918	47.1	124.66	45-50%	35.4	3.5	4
Truncated	allspecies_group58_T			scaffold_27	11250064	11250828	+	765	759	48.2	190.67	45-50%	35.4	5.4	5
Truncated	allspecies_group2_T			scaffold_1128	1035	1540	+	506	506	53.6	172.11	50-55%	32.7	5.3	5
Truncated	allspecies_group41_T			scaffold_235	445398	446114	-	717	699	51.5	176.07	50-55%	32.7	5.4	5
Truncated	allspecies_group62_T			scaffold_274	62247	62564	-	318	309	54.7	293.6	50-55%	32.7	9	9
