# Supplementary material for: Olfactory receptor subgenome and expression in a highly olfactory procellariiform seabird
Source: Oxford University Press journal article supplement (doi:10.1093/genetics/iyab210), 2021-10-04
Supplement: iyab210_supplementary_table_s9.xlsx [file iyab210_supplementary_table_s9.xlsx]

## Sheet: LESP_BUSCO_reference_gene_ratio
Supplementary Table S9 Copy number ratio of BUSCO single-copy reference genes in the Leach's storm petrel genome.
ID	Scaffold	Start	End	CDS_length	Full_gene_length	Full_gene_ACGT_length	GC%	GC_bin	BUSCO_gene_mean_DoC	GC_bin_mean_DoC	BUSCO_gene_mean_ratio	BUSCO_gene_mean_ratio_integer
EOG090F0042	scaffold_0	9536929	9575068	9426	38140	35304	38.5	35-40%	43.86	37.8	1.2	1
EOG090F005D	scaffold_0	7873176	7928560	7500	55385	52025	37	35-40%	42.85	37.8	1.1	1
EOG090F00BG	scaffold_0	10781938	10820604	6453	38667	37942	39.2	35-40%	42.39	37.8	1.1	1
EOG090F00ID	scaffold_0	2345117	2407123	4446	62007	57505	36.5	35-40%	42.74	37.8	1.1	1
EOG090F00Q5	scaffold_0	7502498	7554599	4074	52102	44968	37	35-40%	42.21	37.8	1.1	1
EOG090F00Q8	scaffold_0	20614680	20639859	2931	25180	23236	35.5	35-40%	42.14	37.8	1.1	1
EOG090F015T	scaffold_0	4609926	4623568	3069	13643	12910	42.8	40-45%	42.93	37.1	1.2	1
EOG090F01CW	scaffold_0	24085283	24107131	2880	21849	21250	39.9	35-40%	43.19	37.8	1.1	1
EOG090F01TA	scaffold_0	4975971	5046848	2847	70878	62575	37.5	35-40%	42.92	37.8	1.1	1
EOG090F01VV	scaffold_0	10833197	10878855	3171	45659	41996	45	45-50%	40.46	35.4	1.1	1
EOG090F01WX	scaffold_0	24276046	24312787	2760	36742	34939	38.1	35-40%	42.71	37.8	1.1	1
EOG090F01YH	scaffold_0	15175885	15238607	2133	62723	59583	39	35-40%	42.66	37.8	1.1	1
EOG090F029K	scaffold_0	3595277	3668136	2481	72860	67042	40	40-45%	43.28	37.1	1.2	1
EOG090F02HZ	scaffold_0	13686216	13712954	2379	26739	23132	36.2	35-40%	42.64	37.8	1.1	1
EOG090F02K9	scaffold_0	9713200	9751113	2148	37914	37044	38.1	35-40%	43.67	37.8	1.2	1
EOG090F02UM	scaffold_0	19786484	19865522	2217	79039	66118	39.1	35-40%	39.99	37.8	1.1	1
EOG090F02YD	scaffold_0	10633512	10660532	2469	27021	21648	44.3	40-45%	38.99	37.1	1.1	1
EOG090F03GK	scaffold_0	11097416	11162339	3552	64924	59958	37.8	35-40%	41.38	37.8	1.1	1
EOG090F03N8	scaffold_0	21071020	21085228	1656	14209	13938	38.1	35-40%	42.53	37.8	1.1	1
EOG090F03OF	scaffold_0	6204518	6216673	2055	12156	12101	35.1	35-40%	43.82	37.8	1.2	1
EOG090F03QP	scaffold_0	20933830	20975674	1743	41845	39285	38	35-40%	43.34	37.8	1.1	1
EOG090F03TV	scaffold_0	21690168	21726821	1644	36654	35591	42.8	40-45%	41.4	37.1	1.1	1
EOG090F03YN	scaffold_0	21653712	21679226	1431	25515	24851	45.5	45-50%	40.79	35.4	1.2	1
EOG090F03YR	scaffold_0	19249470	19262893	1572	13424	13101	38.1	35-40%	42.9	37.8	1.1	1
EOG090F03YS	scaffold_0	7926177	7941576	1662	15400	13727	44.1	40-45%	40.45	37.1	1.1	1
EOG090F03Z4	scaffold_0	8206468	8271570	2487	65103	62381	39.9	35-40%	43.68	37.8	1.2	1
EOG090F047N	scaffold_0	2701397	2710409	1488	9013	7551	41.6	40-45%	39.86	37.1	1.1	1
EOG090F04F4	scaffold_0	19648859	19658384	2097	9526	9216	46.6	45-50%	41.33	35.4	1.2	1
EOG090F04JR	scaffold_0	24848094	24854326	1335	6233	6156	45.1	45-50%	40.39	35.4	1.1	1
EOG090F04KS	scaffold_0	9944511	9970477	1683	25967	24673	44.9	40-45%	40.32	37.1	1.1	1
EOG090F050X	scaffold_0	24635277	24643692	1572	8416	8129	37.1	35-40%	41.77	37.8	1.1	1
EOG090F053K	scaffold_0	20016147	20069449	1029	53303	46955	37	35-40%	43.07	37.8	1.1	1
EOG090F056E	scaffold_0	22970185	22993790	1440	23606	22933	37.7	35-40%	42.45	37.8	1.1	1
EOG090F059Q	scaffold_0	3735981	3771069	1449	35089	32658	38.5	35-40%	41.07	37.8	1.1	1
EOG090F05LJ	scaffold_0	10349244	10364663	1359	15420	13641	38.5	35-40%	42.44	37.8	1.1	1
EOG090F05MN	scaffold_0	24597804	24625553	1332	27750	26902	36.4	35-40%	42.64	37.8	1.1	1
EOG090F05OK	scaffold_0	32424714	32439022	1383	14309	13419	37.9	35-40%	42.33	37.8	1.1	1
EOG090F05RS	scaffold_0	13810171	13811430	1260	1260	1260	44.3	40-45%	42.91	37.1	1.2	1
EOG090F05SD	scaffold_0	24187672	24208623	1524	20952	20086	38.6	35-40%	43.48	37.8	1.2	1
EOG090F0640	scaffold_0	8180864	8182105	1242	1242	1241	46.7	45-50%	45.82	35.4	1.3	1
EOG090F06C2	scaffold_0	9645951	9661472	1113	15522	15116	42.5	40-45%	39.56	37.1	1.1	1
EOG090F06J1	scaffold_0	24958589	24978952	2154	20364	18548	42.4	40-45%	45.35	37.1	1.2	1
EOG090F06JR	scaffold_0	24985435	25001961	1077	16527	15153	35.5	35-40%	44.58	37.8	1.2	1
EOG090F06N3	scaffold_0	21053254	21063721	942	10468	10258	51.3	50-55%	40.57	32.7	1.2	1
EOG090F06WS	scaffold_0	21306833	21323434	1026	16602	16387	41.2	40-45%	41.66	37.1	1.1	1
EOG090F06YM	scaffold_0	15110634	15131624	1227	20991	19631	44.2	40-45%	40.54	37.1	1.1	1
EOG090F0786	scaffold_0	6345148	6384004	1137	38857	37119	38.7	35-40%	44.34	37.8	1.2	1
EOG090F079X	scaffold_0	9442460	9443554	1095	1095	1095	46.7	45-50%	38.39	35.4	1.1	1
EOG090F07BO	scaffold_0	32538583	32539578	996	996	996	47.1	45-50%	43.78	35.4	1.2	1
EOG090F07GV	scaffold_0	24157702	24159450	957	1749	1744	42.9	40-45%	39.83	37.1	1.1	1
EOG090F07HR	scaffold_0	15144695	15150654	1011	5960	5760	39.3	35-40%	42.28	37.8	1.1	1
EOG090F07M2	scaffold_0	4582676	4595237	1266	12562	11615	38.4	35-40%	40.79	37.8	1.1	1
EOG090F07OP	scaffold_0	3696765	3703144	1071	6380	5912	44.6	40-45%	38.29	37.1	1	1
EOG090F07R2	scaffold_0	2805300	2825779	951	20480	18631	38.1	35-40%	41.27	37.8	1.1	1
EOG090F07T4	scaffold_0	20987482	21020506	894	33025	30227	44.3	40-45%	40.84	37.1	1.1	1
EOG090F07YJ	scaffold_0	21361615	21375115	921	13501	13323	38.9	35-40%	42.34	37.8	1.1	1
EOG090F084E	scaffold_0	15253014	15285803	1062	32790	30438	41.7	40-45%	40.23	37.1	1.1	1
EOG090F08DF	scaffold_0	19899072	19907051	930	7980	7874	45.3	45-50%	38.53	35.4	1.1	1
EOG090F09IF	scaffold_0	8421850	8434314	621	12465	11342	39.4	35-40%	42.23	37.8	1.1	1
EOG090F09O3	scaffold_0	9756012	9774175	573	18164	17849	39.3	35-40%	42.7	37.8	1.1	1
EOG090F0A1T	scaffold_0	19372519	19378737	711	6219	6147	45.6	45-50%	39.19	35.4	1.1	1
EOG090F0A23	scaffold_0	13866272	13869661	522	3390	3208	45.7	45-50%	37.53	35.4	1.1	1
EOG090F0A7Y	scaffold_0	21349874	21357879	666	8006	7902	39.1	35-40%	40.75	37.8	1.1	1
EOG090F0AGS	scaffold_0	24161290	24169614	723	8325	8103	39.7	35-40%	41.06	37.8	1.1	1
EOG090F0B00	scaffold_0	24646597	24662370	654	15774	15512	40	40-45%	42.53	37.1	1.1	1
EOG090F0BAP	scaffold_0	10321621	10323216	795	1596	1596	64.4	60-65%	23.72	27.7	0.9	1
EOG090F0BFU	scaffold_0	20566870	20575849	468	8980	8810	41.1	40-45%	41.96	37.1	1.1	1
EOG090F0BGW	scaffold_0	15251487	15253955	486	2469	2044	44.3	40-45%	40.48	37.1	1.1	1
EOG090F0CCI	scaffold_0	2411869	2417460	303	5592	5180	41.4	40-45%	40.8	37.1	1.1	1
EOG090F012J	scaffold_1	8620128	8666127	3294	46000	42271	37.8	35-40%	42.68	37.8	1.1	1
EOG090F013D	scaffold_1	6104844	6160996	3786	56153	51664	36.3	35-40%	39.65	37.8	1	1
EOG090F01HA	scaffold_1	3162668	3165403	2736	2736	2732	40.6	40-45%	45.62	37.1	1.2	1
EOG090F01JX	scaffold_1	804091	837658	2451	33568	29548	37.6	35-40%	40.97	37.8	1.1	1
EOG090F02JM	scaffold_1	16684752	16686830	2079	2079	2075	51.2	50-55%	37.37	32.7	1.1	1
EOG090F035V	scaffold_1	19769846	19792036	2139	22191	21939	40.5	40-45%	42.04	37.1	1.1	1
EOG090F03AO	scaffold_1	124312	146901	1569	22590	22276	36.7	35-40%	42.15	37.8	1.1	1
EOG090F043V	scaffold_1	1774866	1821902	1677	47037	45164	40.2	40-45%	41.72	37.1	1.1	1
EOG090F04H9	scaffold_1	22488208	22507482	1659	19275	18794	35.8	35-40%	42.7	37.8	1.1	1
EOG090F04OY	scaffold_1	1730524	1767384	1485	36861	34946	44.6	40-45%	40.89	37.1	1.1	1
EOG090F04W1	scaffold_1	9544999	9582134	1395	37136	34847	39.5	35-40%	40.53	37.8	1.1	1
EOG090F0697	scaffold_1	20208771	20221924	1062	13154	13118	40.3	40-45%	41.94	37.1	1.1	1
EOG090F06AG	scaffold_1	22303905	22320876	1269	16972	16723	42.9	40-45%	40.58	37.1	1.1	1
EOG090F06E8	scaffold_1	182640	203920	1065	21281	18849	45.1	45-50%	42.51	35.4	1.2	1
EOG090F06ET	scaffold_1	10094195	10109599	1071	15405	13576	37.6	35-40%	40.74	37.8	1.1	1
EOG090F06IA	scaffold_1	1628885	1665662	1263	36778	35128	36.8	35-40%	41.47	37.8	1.1	1
EOG090F06R7	scaffold_1	238219	276166	1020	37948	36329	40.1	40-45%	41.98	37.1	1.1	1
EOG090F06UV	scaffold_1	8029759	8030826	1068	1068	1068	40.3	40-45%	40.18	37.1	1.1	1
EOG090F079Y	scaffold_1	7707858	7753386	1071	45529	44694	40.8	40-45%	41.24	37.1	1.1	1
EOG090F07CG	scaffold_1	20747582	20761480	1017	13899	13104	42.3	40-45%	41.71	37.1	1.1	1
EOG090F07HH	scaffold_1	8059826	8060791	966	966	964	38.9	35-40%	41.83	37.8	1.1	1
EOG090F07L3	scaffold_1	4108478	4137077	927	28600	26968	39.7	35-40%	42.99	37.8	1.1	1
EOG090F07XH	scaffold_1	18935366	18936307	942	942	942	56.8	55-60%	36.83	30.1	1.2	1
EOG090F08DL	scaffold_1	3117780	3137761	849	19982	18272	38.7	35-40%	40.05	37.8	1.1	1
EOG090F08DY	scaffold_1	150383	174729	780	24347	23760	37.2	35-40%	41.88	37.8	1.1	1
EOG090F08GP	scaffold_1	21994667	22020682	777	26016	23277	42.4	40-45%	43.59	37.1	1.2	1
EOG090F08J0	scaffold_1	6644391	6647048	363	2658	2596	36.2	35-40%	44.61	37.8	1.2	1
EOG090F08TQ	scaffold_1	21331720	21337208	624	5489	5402	37.5	35-40%	41.19	37.8	1.1	1
EOG090F0933	scaffold_1	1883415	1888422	588	5008	4669	41.1	40-45%	42.52	37.1	1.1	1
EOG090F097P	scaffold_1	9100894	9106494	717	5601	5503	44.7	40-45%	38.35	37.1	1	1
EOG090F09HB	scaffold_1	21285571	21311896	1194	26326	25277	36.3	35-40%	42.96	37.8	1.1	1
EOG090F09J2	scaffold_1	6053670	6061840	678	8171	8165	43	40-45%	41.25	37.1	1.1	1
EOG090F0AFK	scaffold_1	7309442	7316287	489	6846	6750	47.2	45-50%	40.08	35.4	1.1	1
EOG090F0CMY	scaffold_1	22508226	22513572	219	5347	5306	38	35-40%	41.73	37.8	1.1	1
EOG090F00TI	scaffold_10	370441	392825	3468	22385	21655	47.2	45-50%	40.33	35.4	1.1	1
EOG090F00WW	scaffold_10	16883233	16934161	3789	50929	49996	36.3	35-40%	42.21	37.8	1.1	1
EOG090F013Z	scaffold_10	7537365	7583837	3450	46473	44509	46.5	45-50%	38.74	35.4	1.1	1
EOG090F01B7	scaffold_10	5231129	5268466	3297	37338	36427	35.8	35-40%	44.59	37.8	1.2	1
EOG090F01FT	scaffold_10	14005588	14072040	2970	66453	64451	41.5	40-45%	44.7	37.1	1.2	1
EOG090F01JY	scaffold_10	10986309	11019909	2742	33601	32598	37.9	35-40%	41.64	37.8	1.1	1
EOG090F01XH	scaffold_10	3191062	3214351	2349	23290	23102	37	35-40%	43.65	37.8	1.2	1
EOG090F01XL	scaffold_10	9856125	9887182	2763	31058	29957	37.8	35-40%	43.36	37.8	1.1	1
EOG090F020S	scaffold_10	17780398	17803363	2691	22966	22668	37.5	35-40%	42.87	37.8	1.1	1
EOG090F029H	scaffold_10	8419884	8458790	2301	38907	37922	49.1	45-50%	39.35	35.4	1.1	1
EOG090F02G7	scaffold_10	14832570	14847177	2067	14608	14338	37.7	35-40%	42.21	37.8	1.1	1
EOG090F031X	scaffold_10	14309531	14343978	1926	34448	32028	41.5	40-45%	41.28	37.1	1.1	1
EOG090F033B	scaffold_10	10272542	10298900	1884	26359	25856	45.2	45-50%	40.57	35.4	1.1	1
EOG090F0353	scaffold_10	2856821	2904420	2226	47600	45898	40.3	40-45%	42.9	37.1	1.2	1
EOG090F0372	scaffold_10	10407431	10455958	2217	48528	45619	36.6	35-40%	40.05	37.8	1.1	1
EOG090F0374	scaffold_10	13332171	13368030	2064	35860	35091	36.9	35-40%	42.67	37.8	1.1	1
EOG090F03B2	scaffold_10	17877510	17879552	2043	2043	2021	42	40-45%	43.44	37.1	1.2	1
EOG090F03QY	scaffold_10	3296809	3368001	1965	71193	69966	35	35-40%	44.12	37.8	1.2	1
EOG090F03UG	scaffold_10	12207237	12228080	1893	20844	19826	38.7	35-40%	42.5	37.8	1.1	1
EOG090F045G	scaffold_10	13093222	13115174	1962	21953	19242	40.9	40-45%	38.79	37.1	1	1
EOG090F04BL	scaffold_10	10884807	10897701	1611	12895	12828	61.1	60-65%	35.16	27.7	1.3	1
EOG090F04CL	scaffold_10	14527199	14567472	1419	40274	39020	39.5	35-40%	44.31	37.8	1.2	1
EOG090F04VI	scaffold_10	175370	204219	1734	28850	27202	43.8	40-45%	40.77	37.1	1.1	1
EOG090F051H	scaffold_10	11794112	11798480	1434	4369	4207	49.6	45-50%	40.51	35.4	1.1	1
EOG090F0542	scaffold_10	11341266	11350799	1323	9534	8545	40.5	40-45%	42.36	37.1	1.1	1
EOG090F05G8	scaffold_10	422508	428004	1263	5497	5251	45.7	45-50%	38.96	35.4	1.1	1
EOG090F05GM	scaffold_10	8510045	8521023	1353	10979	10790	37.6	35-40%	43.1	37.8	1.1	1
EOG090F05HT	scaffold_10	10515930	10534316	1101	18387	17160	43.2	40-45%	41.29	37.1	1.1	1
EOG090F05L2	scaffold_10	3224978	3238943	1419	13966	13824	39.4	35-40%	41.84	37.8	1.1	1
EOG090F061U	scaffold_10	8527288	8550657	2421	23370	22117	40.4	40-45%	43.93	37.1	1.2	1
EOG090F0622	scaffold_10	17815679	17827681	1284	12003	11675	40.4	40-45%	41.56	37.1	1.1	1
EOG090F06RV	scaffold_10	9740160	9755020	1455	14861	13754	38.9	35-40%	41.88	37.8	1.1	1
EOG090F06SB	scaffold_10	11232406	11246073	1416	13668	13016	43	40-45%	40.29	37.1	1.1	1
EOG090F06ZI	scaffold_10	2024000	2025022	1023	1023	1019	50.6	50-55%	37.85	32.7	1.2	1
EOG090F0739	scaffold_10	8642515	8653125	882	10611	10543	46.8	45-50%	41.61	35.4	1.2	1
EOG090F0756	scaffold_10	2051035	2052015	981	981	980	45.7	45-50%	40.82	35.4	1.2	1
EOG090F076Q	scaffold_10	1978838	1979884	1047	1047	1045	43.1	40-45%	42.15	37.1	1.1	1
EOG090F079K	scaffold_10	9569277	9621957	1047	52681	49835	48	45-50%	39.17	35.4	1.1	1
EOG090F07C2	scaffold_10	15279519	15303816	2979	24298	24076	45.9	45-50%	42.04	35.4	1.2	1
EOG090F07DW	scaffold_10	17765702	17766658	957	957	955	46.7	45-50%	44.62	35.4	1.3	1
EOG090F07T3	scaffold_10	7448065	7456472	963	8408	7941	54.2	50-55%	34.22	32.7	1	1
EOG090F07VL	scaffold_10	2414425	2415345	921	921	918	42.2	40-45%	42.95	37.1	1.2	1
EOG090F07W2	scaffold_10	15225734	15262745	1209	37012	35251	42.2	40-45%	42.66	37.1	1.1	1
EOG090F07XR	scaffold_10	11193575	11194414	840	840	838	59.9	55-60%	31.92	30.1	1.1	1
EOG090F089Z	scaffold_10	8466377	8478801	813	12425	12319	54.4	50-55%	36.88	32.7	1.1	1
EOG090F08B1	scaffold_10	3145147	3162667	825	17521	15559	37.9	35-40%	43.28	37.8	1.1	1
EOG090F08C1	scaffold_10	9686130	9715049	1230	28920	28400	38	35-40%	42.92	37.8	1.1	1
EOG090F08SS	scaffold_10	17988596	18009787	1020	21192	20312	43.5	40-45%	40.7	37.1	1.1	1
EOG090F08WH	scaffold_10	12931879	12946215	858	14337	13654	41.6	40-45%	43.46	37.1	1.2	1
EOG090F0987	scaffold_10	7457406	7464753	756	7348	7174	58.7	55-60%	32.55	30.1	1.1	1
EOG090F099P	scaffold_10	11750187	11755212	675	5026	4478	46.9	45-50%	42.19	35.4	1.2	1
EOG090F09BC	scaffold_10	18168886	18176907	1152	8022	7952	39.8	35-40%	43.32	37.8	1.1	1
EOG090F09CV	scaffold_10	740196	744549	693	4354	4292	44.7	40-45%	36.7	37.1	1	1
EOG090F09HY	scaffold_10	8823420	8839301	840	15882	15446	37.9	35-40%	41.58	37.8	1.1	1
EOG090F09JD	scaffold_10	8496338	8503433	672	7096	6765	43.1	40-45%	41.66	37.1	1.1	1
EOG090F09WL	scaffold_10	8805683	8814090	651	8408	8111	38.8	35-40%	44.21	37.8	1.2	1
EOG090F0A3Q	scaffold_10	18150795	18168596	585	17802	16821	40.7	40-45%	42.61	37.1	1.1	1
EOG090F0A7E	scaffold_10	11270082	11270657	576	576	576	47.2	45-50%	39.44	35.4	1.1	1
EOG090F0AD0	scaffold_10	2467995	2483815	738	15821	14926	46.7	45-50%	39.03	35.4	1.1	1
EOG090F0AH7	scaffold_10	2155357	2162590	600	7234	7051	42.8	40-45%	40.86	37.1	1.1	1
EOG090F0AI5	scaffold_10	216028	222485	528	6458	6252	49	45-50%	42.52	35.4	1.2	1
EOG090F0AJ1	scaffold_10	17885191	17890035	882	4845	4386	48.9	45-50%	37.45	35.4	1.1	1
EOG090F0AJR	scaffold_10	15325791	15335146	594	9356	9254	43.5	40-45%	42.38	37.1	1.1	1
EOG090F0AOZ	scaffold_10	2391871	2403715	345	11845	11720	45.7	45-50%	42.17	35.4	1.2	1
EOG090F0B36	scaffold_10	14869071	14871607	573	2537	2455	37.7	35-40%	41.15	37.8	1.1	1
EOG090F0BV5	scaffold_10	11603840	11611825	345	7986	7753	52.3	50-55%	42.63	32.7	1.3	1
EOG090F0CEL	scaffold_10	13772283	13774489	237	2207	2206	39	35-40%	42.28	37.8	1.1	1
EOG090F00GU	scaffold_100	640917	683362	4572	42446	40912	37.4	35-40%	42.56	37.8	1.1	1
EOG090F010T	scaffold_100	301423	359007	3657	57585	55143	43.6	40-45%	43.27	37.1	1.2	1
EOG090F01EM	scaffold_100	510215	565103	3963	54889	53172	38.1	35-40%	42.89	37.8	1.1	1
EOG090F029U	scaffold_100	392995	410328	2115	17334	17091	39.2	35-40%	41.67	37.8	1.1	1
EOG090F032R	scaffold_100	1926443	1948254	1833	21812	20703	45.2	45-50%	42.5	35.4	1.2	1
EOG090F0375	scaffold_100	254971	276012	1824	21042	20487	40.7	40-45%	43.71	37.1	1.2	1
EOG090F037H	scaffold_100	1970226	1981162	1803	10937	10755	39.3	35-40%	43.42	37.8	1.1	1
EOG090F03RG	scaffold_100	2748300	2757203	960	8904	8710	39.5	35-40%	45.21	37.8	1.2	1
EOG090F0495	scaffold_100	120451	145840	1602	25390	24289	47.6	45-50%	39.52	35.4	1.1	1
EOG090F05FW	scaffold_100	267169	297877	1236	30709	29783	42.9	40-45%	43.23	37.1	1.2	1
EOG090F05JK	scaffold_100	2998139	3011649	1248	13511	13231	47.4	45-50%	39.72	35.4	1.1	1
EOG090F05KR	scaffold_100	719308	725220	717	5913	5903	43.7	40-45%	42.24	37.1	1.1	1
EOG090F05VR	scaffold_100	181683	184582	1140	2900	2786	47.1	45-50%	42.31	35.4	1.2	1
EOG090F06DH	scaffold_100	60856	62849	1101	1994	1988	44	40-45%	39.15	37.1	1.1	1
EOG090F06WM	scaffold_100	3232595	3252096	1026	19502	18275	36.7	35-40%	41.06	37.8	1.1	1
EOG090F074B	scaffold_100	597480	607274	933	9795	9785	40.1	40-45%	46.73	37.1	1.3	1
EOG090F0762	scaffold_100	486466	487500	1035	1035	1035	45	45-50%	42.72	35.4	1.2	1
EOG090F083Q	scaffold_100	3103186	3104121	936	936	935	44.3	40-45%	37.01	37.1	1	1
EOG090F083V	scaffold_100	1918546	1919604	1059	1059	1058	43.5	40-45%	37.77	37.1	1	1
EOG090F08N2	scaffold_100	3163716	3164621	906	906	905	46.6	45-50%	39.51	35.4	1.1	1
EOG090F08NF	scaffold_100	3093314	3094258	945	945	881	41.7	40-45%	35.75	37.1	1	1
EOG090F095J	scaffold_100	3288941	3290668	684	1728	1723	56.7	55-60%	34.89	30.1	1.2	1
EOG090F09A3	scaffold_100	2931766	2945711	726	13946	13685	51.6	50-55%	37.21	32.7	1.1	1
EOG090F0ACR	scaffold_100	1587376	1597966	717	10591	9959	38	35-40%	42.71	37.8	1.1	1
EOG090F0AHP	scaffold_100	1545344	1554085	675	8742	8697	42	40-45%	45.14	37.1	1.2	1
EOG090F0AYL	scaffold_100	586188	589285	429	3098	3086	42.1	40-45%	36.26	37.1	1	1
EOG090F02EB	scaffold_101	935216	958201	2253	22986	22624	41.8	40-45%	43.04	37.1	1.2	1
EOG090F065G	scaffold_101	909174	918300	1308	9127	9043	39.6	35-40%	43.05	37.8	1.1	1
EOG090F07CP	scaffold_101	2245378	2250258	936	4881	4797	47.5	45-50%	37.1	35.4	1	1
EOG090F07SL	scaffold_101	2784630	2798950	1026	14321	14130	43.8	40-45%	41.02	37.1	1.1	1
EOG090F08DA	scaffold_101	2974330	2985899	975	11570	11273	41.9	40-45%	42.94	37.1	1.2	1
EOG090F08SH	scaffold_101	1094031	1106971	783	12941	12861	50.4	50-55%	37.66	32.7	1.2	1
EOG090F09FM	scaffold_101	1108413	1110755	813	2343	2320	43.3	40-45%	43.5	37.1	1.2	1
EOG090F0B6P	scaffold_101	2585803	2595175	462	9373	9218	48.4	45-50%	41.78	35.4	1.2	1
EOG090F0BVU	scaffold_101	2560989	2567884	1146	6896	6806	47.3	45-50%	41.97	35.4	1.2	1
EOG090F0C0E	scaffold_101	2734494	2736440	387	1947	1945	41.6	40-45%	40.57	37.1	1.1	1
EOG090F0C3A	scaffold_101	2749715	2751620	315	1906	1903	40.9	40-45%	46.3	37.1	1.2	1
EOG090F00IC	scaffold_102	1406765	1451875	3459	45111	41356	36.1	35-40%	43.5	37.8	1.2	1
EOG090F01Y7	scaffold_102	705496	758199	4128	52704	50283	38.9	35-40%	41.63	37.8	1.1	1
EOG090F06O9	scaffold_102	117496	151531	1173	34036	26711	40.4	40-45%	40.61	37.1	1.1	1
EOG090F06S0	scaffold_102	789117	793610	1017	4494	4474	44.3	40-45%	40.07	37.1	1.1	1
EOG090F08DC	scaffold_102	1567546	1602316	1209	34771	33325	38.8	35-40%	41.86	37.8	1.1	1
EOG090F09M1	scaffold_102	1831232	1838982	597	7751	7542	39.4	35-40%	40.64	37.8	1.1	1
EOG090F0BRH	scaffold_102	184626	191469	390	6844	5764	40.8	40-45%	36.63	37.1	1	1
EOG090F01IH	scaffold_103	1833734	1878283	3093	44550	42548	37.5	35-40%	43.85	37.8	1.2	1
EOG090F02SE	scaffold_103	2386195	2419615	1911	33421	31883	40.9	40-45%	41.48	37.1	1.1	1
EOG090F0357	scaffold_103	2348459	2352264	1905	3806	3806	42.2	40-45%	43.43	37.1	1.2	1
EOG090F04FT	scaffold_103	2018004	2066984	1398	48981	45031	37.4	35-40%	44.39	37.8	1.2	1
EOG090F04H1	scaffold_103	1693149	1735961	1500	42813	41308	39.1	35-40%	43.28	37.8	1.1	1
EOG090F05B8	scaffold_103	853094	868368	1449	15275	13399	37.9	35-40%	43.64	37.8	1.2	1
EOG090F07DI	scaffold_103	2481183	2496290	888	15108	15012	41.4	40-45%	41.08	37.1	1.1	1
EOG090F07HP	scaffold_103	2522799	2536636	834	13838	12190	45.4	45-50%	39.17	35.4	1.1	1
EOG090F09CC	scaffold_103	778224	788872	714	10649	10468	35.7	35-40%	44.15	37.8	1.2	1
EOG090F09D7	scaffold_103	2627867	2634595	669	6729	6657	41.9	40-45%	39.22	37.1	1.1	1
EOG090F0CLD	scaffold_103	2661663	2671560	303	9898	7924	38.4	35-40%	40.39	37.8	1.1	1
EOG090F01FC	scaffold_104	1640291	1714640	3069	74350	71567	39.9	35-40%	44.1	37.8	1.2	1
EOG090F07EN	scaffold_104	1523568	1556942	990	33375	32830	38.1	35-40%	42.79	37.8	1.1	1
EOG090F0A2V	scaffold_104	1501353	1522045	618	20693	19339	37.9	35-40%	44.3	37.8	1.2	1
EOG090F00OF	scaffold_105	70748	159761	4530	89014	76803	39.4	35-40%	41.23	37.8	1.1	1
EOG090F029Y	scaffold_105	2112877	2121076	1980	8200	6530	40.3	40-45%	40.84	37.1	1.1	1
EOG090F03G0	scaffold_105	2067809	2084046	2109	16238	14372	37.2	35-40%	39.8	37.8	1.1	1
EOG090F05SG	scaffold_105	907222	908016	795	795	794	49.7	45-50%	38.47	35.4	1.1	1
EOG090F0784	scaffold_105	2249474	2250556	1083	1083	1082	49.3	45-50%	46.66	35.4	1.3	1
EOG090F03M9	scaffold_106	240284	280557	1770	40274	38613	38.2	35-40%	41.93	37.8	1.1	1
EOG090F04OP	scaffold_106	1586429	1609479	1380	23051	22211	37.8	35-40%	44.19	37.8	1.2	1
EOG090F072A	scaffold_106	205001	238922	1002	33922	33586	43.3	40-45%	41.81	37.1	1.1	1
EOG090F07V0	scaffold_106	287007	312214	999	25208	24240	48.6	45-50%	39.11	35.4	1.1	1
EOG090F07YY	scaffold_106	1903820	1911639	789	7820	7742	40.7	40-45%	40.78	37.1	1.1	1
EOG090F0B07	scaffold_106	106442	126589	672	20148	19464	45.6	45-50%	39.43	35.4	1.1	1
EOG090F0B1T	scaffold_106	2808876	2819687	408	10812	10686	35.8	35-40%	45.27	37.8	1.2	1
EOG090F0BDZ	scaffold_106	2774262	2789803	396	15542	15502	36.6	35-40%	47.51	37.8	1.3	1
EOG090F03G3	scaffold_107	2641200	2663165	1653	21966	21648	43.7	40-45%	40.38	37.1	1.1	1
EOG090F046Y	scaffold_107	2381534	2405184	1257	23651	22470	47	45-50%	40.61	35.4	1.1	1
EOG090F04P7	scaffold_107	580569	595581	1308	15013	12517	54.1	50-55%	35.09	32.7	1.1	1
EOG090F05JQ	scaffold_107	2932402	2944576	1431	12175	11646	53.1	50-55%	34.92	32.7	1.1	1
EOG090F05PU	scaffold_107	2946962	2954941	1020	7980	6594	52.9	50-55%	36.86	32.7	1.1	1
EOG090F05WJ	scaffold_107	1508787	1557744	1230	48958	43509	41.1	40-45%	42.72	37.1	1.2	1
EOG090F0647	scaffold_107	2693590	2698879	1122	5290	5257	40.4	40-45%	40.9	37.1	1.1	1
EOG090F06MY	scaffold_107	1112340	1119724	678	7385	7184	45.9	45-50%	39.62	35.4	1.1	1
EOG090F06W3	scaffold_107	2925356	2929932	984	4577	4024	49.7	45-50%	15.53	35.4	0.4	0
EOG090F09UQ	scaffold_107	2199300	2200028	729	729	729	49.5	45-50%	38.91	35.4	1.1	1
EOG090F0ABV	scaffold_107	2270919	2324299	723	53381	50671	41.8	40-45%	41.38	37.1	1.1	1
EOG090F0CZJ	scaffold_107	3065223	3066219	231	997	994	45.3	45-50%	36.76	35.4	1	1
EOG090F01D4	scaffold_108	24845	63407	3057	38563	31985	42.1	40-45%	39.76	37.1	1.1	1
EOG090F02EJ	scaffold_108	940206	952995	2304	12790	11584	40.2	40-45%	39.31	37.1	1.1	1
EOG090F02PH	scaffold_108	439461	454493	2034	15033	14946	50	50-55%	41.43	32.7	1.3	1
EOG090F03WR	scaffold_108	304098	327607	1743	23510	21976	45.9	45-50%	41.56	35.4	1.2	1
EOG090F067H	scaffold_108	1372015	1400587	1152	28573	26649	47	45-50%	39.84	35.4	1.1	1
EOG090F0680	scaffold_108	1089081	1112554	1209	23474	22430	47.8	45-50%	37.35	35.4	1.1	1
EOG090F06TK	scaffold_108	616940	617998	1059	1059	1057	46.2	45-50%	40.72	35.4	1.2	1
EOG090F09HT	scaffold_108	148502	156960	720	8459	8434	42.4	40-45%	41.39	37.1	1.1	1
EOG090F09JJ	scaffold_108	163988	176649	765	12662	10476	37.8	35-40%	44.24	37.8	1.2	1
EOG090F09Q2	scaffold_108	2424002	2431595	639	7594	7543	47.5	45-50%	36.27	35.4	1	1
EOG090F09QK	scaffold_108	17747	22179	732	4433	4335	46.8	45-50%	40.74	35.4	1.2	1
EOG090F0BHD	scaffold_108	70705	71751	282	1047	1046	40.5	40-45%	43.63	37.1	1.2	1
EOG090F0CUB	scaffold_108	2808585	2809658	1074	1074	948	72.7	70-75%	23.15	24.1	1	1
EOG090F0162	scaffold_109	2545310	2609588	3084	64279	58449	42	40-45%	43.13	37.1	1.2	1
EOG090F0633	scaffold_109	323115	342674	1389	19560	16193	36.3	35-40%	41.6	37.8	1.1	1
EOG090F07WO	scaffold_109	314929	322338	756	7410	6653	40.2	40-45%	40.36	37.1	1.1	1
EOG090F09I5	scaffold_109	2932777	2942187	618	9411	9197	42.3	40-45%	40.87	37.1	1.1	1
EOG090F0A38	scaffold_109	893926	912491	879	18566	18073	36.6	35-40%	43.32	37.8	1.1	1
EOG090F0A94	scaffold_109	1406636	1411850	573	5215	5015	40.7	40-45%	41	37.1	1.1	1
EOG090F0BPD	scaffold_109	2794762	2802208	2484	7447	3556	42	40-45%	43.36	37.1	1.2	1
EOG090F006R	scaffold_11	4795412	4873543	4851	78132	70932	41.2	40-45%	42.36	37.1	1.1	1
EOG090F007J	scaffold_11	2862891	2915802	6873	52912	51834	39.1	35-40%	43.02	37.8	1.1	1
EOG090F0102	scaffold_11	12045587	12049072	3486	3486	3485	43.2	40-45%	42.35	37.1	1.1	1
EOG090F01BA	scaffold_11	4233400	4272286	3060	38887	34723	38.8	35-40%	43.06	37.8	1.1	1
EOG090F01ZD	scaffold_11	6815368	6850063	1752	34696	33231	39.7	35-40%	44.16	37.8	1.2	1
EOG090F02L6	scaffold_11	2477678	2524431	1956	46754	44168	37.4	35-40%	42.88	37.8	1.1	1
EOG090F03OT	scaffold_11	2810620	2829419	1701	18800	15580	38.4	35-40%	41.26	37.8	1.1	1
EOG090F04AK	scaffold_11	1793277	1833464	1461	40188	38378	41.4	40-45%	43.32	37.1	1.2	1
EOG090F04P8	scaffold_11	144006	179815	1851	35810	34521	42.9	40-45%	42.02	37.1	1.1	1
EOG090F04PJ	scaffold_11	1597881	1608211	1440	10331	10089	39.7	35-40%	40.78	37.8	1.1	1
EOG090F04R1	scaffold_11	4159499	4183681	1683	24183	23658	38.9	35-40%	42.71	37.8	1.1	1
EOG090F04R7	scaffold_11	356374	373405	1515	17032	13287	41.4	40-45%	40.55	37.1	1.1	1
EOG090F04T4	scaffold_11	4345072	4376579	1725	31508	27498	37.8	35-40%	41.91	37.8	1.1	1
EOG090F04WJ	scaffold_11	12198173	12259685	1986	61513	59419	39.3	35-40%	43.16	37.8	1.1	1
EOG090F055Q	scaffold_11	7380282	7403607	1365	23326	22451	36.6	35-40%	42.7	37.8	1.1	1
EOG090F05D2	scaffold_11	2934069	2942772	1320	8704	8649	38.8	35-40%	45.1	37.8	1.2	1
EOG090F05LL	scaffold_11	4188424	4227042	12087	38619	37266	39.5	35-40%	42.51	37.8	1.1	1
EOG090F05QN	scaffold_11	2158243	2198674	1254	40432	38899	42.6	40-45%	42.73	37.1	1.2	1
EOG090F06UL	scaffold_11	4304587	4305672	1086	1086	1086	39.8	35-40%	38.71	37.8	1	1
EOG090F06V3	scaffold_11	1251357	1273104	1086	21748	19825	42.8	40-45%	41.2	37.1	1.1	1
EOG090F070K	scaffold_11	10958150	10982203	1119	24054	21999	40.4	40-45%	41.2	37.1	1.1	1
EOG090F072C	scaffold_11	18036095	18037195	1101	1101	1101	44.1	40-45%	44.11	37.1	1.2	1
EOG090F075K	scaffold_11	7456991	7467083	1035	10093	8724	38.4	35-40%	43.37	37.8	1.1	1
EOG090F07T6	scaffold_11	2349609	2373790	894	24182	20453	39.1	35-40%	41.53	37.8	1.1	1
EOG090F07VN	scaffold_11	5840383	5842755	879	2373	2373	37.1	35-40%	47.19	37.8	1.2	1
EOG090F080U	scaffold_11	10895633	10913686	882	18054	17890	36.7	35-40%	41.84	37.8	1.1	1
EOG090F0835	scaffold_11	3564399	3570377	750	5979	5952	45.9	45-50%	41.83	35.4	1.2	1
EOG090F087N	scaffold_11	4389176	4401858	1032	12683	11883	40.4	40-45%	40.06	37.1	1.1	1
EOG090F0895	scaffold_11	4723788	4733231	873	9444	9331	40.5	40-45%	42.93	37.1	1.2	1
EOG090F08D6	scaffold_11	4327056	4339877	885	12822	12292	42.6	40-45%	40.87	37.1	1.1	1
EOG090F08JW	scaffold_11	2902615	2932897	1224	30283	29127	40.8	40-45%	41.65	37.1	1.1	1
EOG090F094S	scaffold_11	10707094	10736081	879	28988	28380	38.7	35-40%	43.93	37.8	1.2	1
EOG090F09FF	scaffold_11	5881221	5886185	657	4965	4927	41.8	40-45%	39.99	37.1	1.1	1
EOG090F09WC	scaffold_11	3998346	4001758	582	3413	3272	47	45-50%	41.68	35.4	1.2	1
EOG090F0AFZ	scaffold_11	17710074	17720725	645	10652	10555	39.6	35-40%	41.42	37.8	1.1	1
EOG090F0AJS	scaffold_11	4317601	4323302	477	5702	5022	36	35-40%	40.19	37.8	1.1	1
EOG090F0APU	scaffold_11	5755001	5793475	1884	38475	35021	38.4	35-40%	41.06	37.8	1.1	1
EOG090F0AYU	scaffold_11	4403658	4420461	1068	16804	14252	39	35-40%	42.75	37.8	1.1	1
EOG090F0BGD	scaffold_11	2450617	2454164	405	3548	3540	37.8	35-40%	44.53	37.8	1.2	1
EOG090F0BLY	scaffold_11	3887821	3905032	333	17212	16435	41.8	40-45%	42.95	37.1	1.2	1
EOG090F0BM4	scaffold_11	1453648	1460974	867	7327	6852	38.8	35-40%	39.94	37.8	1.1	1
EOG090F0BRP	scaffold_11	1322222	1346064	516	23843	21851	40.1	40-45%	42.6	37.1	1.1	1
EOG090F0BVK	scaffold_11	3686911	3687291	381	381	381	52.5	50-55%	37.83	32.7	1.2	1
EOG090F0C90	scaffold_11	7408360	7411182	324	2823	2511	39	35-40%	41.89	37.8	1.1	1
EOG090F0D3O	scaffold_11	1162867	1163920	210	1054	1053	48.6	45-50%	38.57	35.4	1.1	1
EOG090F01AM	scaffold_110	1188170	1229062	3342	40893	39079	44.4	40-45%	40.69	37.1	1.1	1
EOG090F02XL	scaffold_110	1761062	1773007	2073	11946	11392	38.4	35-40%	43.83	37.8	1.2	1
EOG090F05ZX	scaffold_110	1904315	1914552	1599	10238	10132	51.5	50-55%	34.77	32.7	1.1	1
EOG090F0611	scaffold_110	2515853	2532394	1227	16542	15460	41.9	40-45%	42.82	37.1	1.2	1
EOG090F066L	scaffold_110	1596448	1607420	1758	10973	10606	40.2	40-45%	43.46	37.1	1.2	1
EOG090F06WI	scaffold_110	1678470	1679486	1017	1017	1015	43.9	40-45%	42.97	37.1	1.2	1
EOG090F08VZ	scaffold_110	1646352	1664417	1203	18066	17533	40.5	40-45%	42.13	37.1	1.1	1
EOG090F09DF	scaffold_110	1784324	1793900	624	9577	9293	47.4	45-50%	39.78	35.4	1.1	1
EOG090F0BMG	scaffold_110	1885181	1895631	705	10451	10213	43.4	40-45%	41.47	37.1	1.1	1
EOG090F01Y8	scaffold_111	2650664	2653237	2574	2574	2571	49.2	45-50%	40.77	35.4	1.2	1
EOG090F03DT	scaffold_111	1129268	1204100	3396	74833	71073	37.5	35-40%	41.86	37.8	1.1	1
EOG090F03DY	scaffold_111	1129268	1204100	3396	74833	71073	37.5	35-40%	41.86	37.8	1.1	1
EOG090F03X4	scaffold_111	1537271	1551980	1635	14710	14586	41.8	40-45%	42.27	37.1	1.1	1
EOG090F069K	scaffold_111	631945	660204	1236	28260	27451	44.2	40-45%	40.28	37.1	1.1	1
EOG090F070C	scaffold_111	1514227	1524979	1080	10753	10640	38.6	35-40%	43.42	37.8	1.1	1
EOG090F07US	scaffold_111	975034	982442	876	7409	7394	43.8	40-45%	38.9	37.1	1	1
EOG090F0B51	scaffold_111	1045713	1058279	660	12567	9739	50.1	50-55%	36.88	32.7	1.1	1
EOG090F01ZN	scaffold_112	2570808	2599286	3582	28479	28045	41.2	40-45%	41.4	37.1	1.1	1
EOG090F02VR	scaffold_112	490011	528848	1932	38838	37425	44	40-45%	41.22	37.1	1.1	1
EOG090F03I3	scaffold_112	37569	51193	1839	13625	13007	42.8	40-45%	41.83	37.1	1.1	1
EOG090F03XL	scaffold_112	1137484	1232621	1743	95138	93299	36.9	35-40%	44.04	37.8	1.2	1
EOG090F04NC	scaffold_112	845072	849797	1524	4726	4241	50.2	50-55%	40.75	32.7	1.2	1
EOG090F04OA	scaffold_112	1177048	1186940	1479	9893	9748	37.6	35-40%	42.23	37.8	1.1	1
EOG090F04XR	scaffold_112	153965	158284	1122	4320	4272	52.3	50-55%	35.7	32.7	1.1	1
EOG090F0569	scaffold_112	908507	925388	2037	16882	15766	42.8	40-45%	42.4	37.1	1.1	1
EOG090F072B	scaffold_112	32502	35962	1005	3461	3412	45.4	45-50%	40.35	35.4	1.1	1
EOG090F07MG	scaffold_112	928200	935110	1149	6911	6722	50.7	50-55%	40.02	32.7	1.2	1
EOG090F07V8	scaffold_112	2557906	2568209	927	10304	10047	43	40-45%	41.36	37.1	1.1	1
EOG090F084S	scaffold_112	2716216	2729139	867	12924	11559	56	55-60%	36.53	30.1	1.2	1
EOG090F09GX	scaffold_112	456393	468789	765	12397	12342	52.9	50-55%	35.74	32.7	1.1	1
EOG090F09I9	scaffold_112	235084	236250	1167	1167	1010	49.7	45-50%	36.73	35.4	1	1
EOG090F09KW	scaffold_112	2143341	2150588	663	7248	7118	43.7	40-45%	41.54	37.1	1.1	1
EOG090F0A07	scaffold_112	2540719	2546212	546	5494	5482	44	40-45%	40.33	37.1	1.1	1
EOG090F0A9M	scaffold_112	104657	108121	579	3465	3463	55.4	55-60%	34.89	30.1	1.2	1
EOG090F00HE	scaffold_113	736762	782962	3954	46201	44937	37.1	35-40%	43.73	37.8	1.2	1
EOG090F022H	scaffold_113	1076417	1127674	2295	51258	49954	36.7	35-40%	44.4	37.8	1.2	1
EOG090F02LL	scaffold_113	2321117	2335335	2067	14219	14196	35.8	35-40%	45.37	37.8	1.2	1
EOG090F02ZQ	scaffold_113	1055937	1075154	1806	19218	18481	38.6	35-40%	43.4	37.8	1.1	1
EOG090F03VR	scaffold_113	1212346	1225130	1614	12785	12676	40.4	40-45%	44.79	37.1	1.2	1
EOG090F03Y2	scaffold_113	2847512	2863803	1542	16292	15076	37.9	35-40%	17.58	37.8	0.5	1
EOG090F04D0	scaffold_113	2834116	2842070	1440	7955	7903	39.1	35-40%	41.14	37.8	1.1	1
EOG090F04MY	scaffold_113	2699387	2724114	1560	24728	23712	37.5	35-40%	43.5	37.8	1.2	1
EOG090F0543	scaffold_113	1623292	1671966	1416	48675	44561	38.9	35-40%	43.1	37.8	1.1	1
EOG090F05LK	scaffold_113	2774691	2803998	1086	29308	27586	36.5	35-40%	43.75	37.8	1.2	1
EOG090F05QO	scaffold_113	2212369	2227193	1308	14825	14507	37.5	35-40%	44.4	37.8	1.2	1
EOG090F05ZL	scaffold_113	2553390	2580528	1161	27139	25893	42.4	40-45%	42.67	37.1	1.2	1
EOG090F06R3	scaffold_113	1183502	1213242	1254	29741	28452	38.9	35-40%	42.38	37.8	1.1	1
EOG090F06VW	scaffold_113	1793008	1850744	930	57737	53809	36.5	35-40%	44.23	37.8	1.2	1
EOG090F080V	scaffold_113	2201019	2209745	993	8727	8310	40.5	40-45%	42.63	37.1	1.1	1
EOG090F01UZ	scaffold_114	593164	630875	2601	37712	35685	49.6	45-50%	36.79	35.4	1	1
EOG090F02X2	scaffold_114	1995356	1997512	2070	2157	2080	51.6	50-55%	35.89	32.7	1.1	1
EOG090F05CR	scaffold_114	2513922	2517881	1674	3960	3766	52	50-55%	36.34	32.7	1.1	1
EOG090F063N	scaffold_114	2080353	2097050	1377	16698	16388	62.6	60-65%	29.62	27.7	1.1	1
EOG090F06LR	scaffold_114	977187	1001659	1266	24473	23484	48.8	45-50%	38.5	35.4	1.1	1
EOG090F07L5	scaffold_114	679425	682938	900	3514	3432	50.6	50-55%	38.61	32.7	1.2	1
EOG090F08AG	scaffold_114	1720013	1734136	840	14124	14027	40.3	40-45%	41.79	37.1	1.1	1
EOG090F08JH	scaffold_114	1003319	1026704	1698	23386	12114	48.1	45-50%	45.69	35.4	1.3	1
EOG090F08TE	scaffold_114	2468042	2474328	738	6287	5367	54.2	50-55%	35.73	32.7	1.1	1
EOG090F08U0	scaffold_114	1979255	1985366	867	6112	6029	58	55-60%	34.47	30.1	1.1	1
EOG090F08Z2	scaffold_114	24679	28809	777	4131	4119	52.6	50-55%	37.48	32.7	1.1	1
EOG090F0A4Z	scaffold_114	2786715	2802570	549	15856	14445	38.7	35-40%	43.89	37.8	1.2	1
EOG090F0B1S	scaffold_114	1417605	1419645	462	2041	1961	53.9	50-55%	37.71	32.7	1.2	1
EOG090F0C20	scaffold_114	2721504	2744487	375	22984	21905	39.6	35-40%	41.39	37.8	1.1	1
EOG090F01RU	scaffold_115	1914821	1930556	3156	15736	15657	54.2	50-55%	34.6	32.7	1.1	1
EOG090F01XC	scaffold_115	255176	287418	2799	32243	31747	40	40-45%	42.7	37.1	1.2	1
EOG090F05CS	scaffold_115	330596	355109	2225	24514	24078	43	40-45%	39.86	37.1	1.1	1
EOG090F05PV	scaffold_115	333183	341973	1449	8791	8540	40.6	40-45%	40.07	37.1	1.1	1
EOG090F05XC	scaffold_115	2065382	2085285	1269	19904	19135	46	45-50%	39.59	35.4	1.1	1
EOG090F067V	scaffold_115	1069556	1088675	1284	19120	18441	53.3	50-55%	37.12	32.7	1.1	1
EOG090F07DP	scaffold_115	438677	449208	1029	10532	10449	41.2	40-45%	42.16	37.1	1.1	1
EOG090F07NA	scaffold_115	357590	363536	987	5947	5896	53.2	50-55%	40.27	32.7	1.2	1
EOG090F0A3P	scaffold_115	2817312	2831309	639	13998	12808	41.2	40-45%	40.74	37.1	1.1	1
EOG090F0034	scaffold_116	1566534	1611656	8415	45123	38895	39.9	35-40%	41.44	37.8	1.1	1
EOG090F02DN	scaffold_116	1653413	1670960	2250	17548	17159	38.3	35-40%	42.02	37.8	1.1	1
EOG090F02UJ	scaffold_116	1048424	1116887	2190	68464	66607	41	40-45%	42.51	37.1	1.1	1
EOG090F03WO	scaffold_116	2452775	2479702	1551	26928	25969	40.5	40-45%	40.41	37.1	1.1	1
EOG090F03X2	scaffold_116	163503	202508	1614	39006	36127	37.9	35-40%	42.66	37.8	1.1	1
EOG090F04AO	scaffold_116	33603	80825	2034	47223	44272	40	40-45%	43.65	37.1	1.2	1
EOG090F05PM	scaffold_116	1388518	1442452	1143	53935	50867	42	40-45%	42.43	37.1	1.1	1
EOG090F05Q6	scaffold_116	117167	159591	1275	42425	39874	37.6	35-40%	44.44	37.8	1.2	1
EOG090F05QR	scaffold_116	2620929	2648013	1155	27085	26662	36.3	35-40%	41.99	37.8	1.1	1
EOG090F072X	scaffold_116	2741461	2762213	1221	20753	19907	36.8	35-40%	41.11	37.8	1.1	1
EOG090F07XA	scaffold_116	1897939	1898859	921	921	919	49.1	45-50%	44.67	35.4	1.3	1
EOG090F09CT	scaffold_116	1677960	1690973	705	13014	12770	36.9	35-40%	41.29	37.8	1.1	1
EOG090F0B21	scaffold_116	1777106	1782576	447	5471	4231	39.9	35-40%	41.73	37.8	1.1	1
EOG090F01OA	scaffold_117	499077	561398	2922	62322	60402	37.3	35-40%	42.42	37.8	1.1	1
EOG090F03BB	scaffold_117	1782964	1801141	2103	18178	17731	38.8	35-40%	43	37.8	1.1	1
EOG090F04MG	scaffold_117	1008386	1034192	1593	25807	25056	35.1	35-40%	44.46	37.8	1.2	1
EOG090F04QG	scaffold_117	956593	968928	1377	12336	12174	38.1	35-40%	44.71	37.8	1.2	1
EOG090F059P	scaffold_117	1620723	1640295	1398	19573	17599	38	35-40%	42.3	37.8	1.1	1
EOG090F06J7	scaffold_117	28255	55065	1083	26811	25988	36.9	35-40%	44.2	37.8	1.2	1
EOG090F07T5	scaffold_117	1469035	1497431	876	28397	27790	41.6	40-45%	42.16	37.1	1.1	1
EOG090F08O8	scaffold_117	1365776	1379727	936	13952	13915	37.5	35-40%	43.11	37.8	1.1	1
EOG090F09A0	scaffold_117	1178941	1191821	675	12881	12542	36.6	35-40%	46.01	37.8	1.2	1
EOG090F0A9T	scaffold_117	794474	806399	909	11926	11397	40.3	40-45%	43.08	37.1	1.2	1
EOG090F0AZ7	scaffold_117	749555	762320	660	12766	10459	40.7	40-45%	42.4	37.1	1.1	1
EOG090F00I3	scaffold_118	138985	174912	5454	35928	35015	42.7	40-45%	43.83	37.1	1.2	1
EOG090F01IC	scaffold_118	333492	392859	2592	59368	58396	40	40-45%	43.3	37.1	1.2	1
EOG090F03K4	scaffold_118	2395707	2419768	1782	24062	23694	45.2	45-50%	42.4	35.4	1.2	1
EOG090F03VZ	scaffold_118	1532972	1610932	1449	77961	74345	42.6	40-45%	42.8	37.1	1.2	1
EOG090F05GO	scaffold_118	390734	414199	1293	23466	22103	41.6	40-45%	42.96	37.1	1.2	1
EOG090F08H6	scaffold_118	2144170	2166650	618	22481	21154	45.1	45-50%	41.46	35.4	1.2	1
EOG090F0A4L	scaffold_118	2648128	2667123	642	18996	15214	51.5	50-55%	37.79	32.7	1.2	1
EOG090F01XI	scaffold_119	2006521	2041024	2604	34504	32188	39.9	35-40%	44.69	37.8	1.2	1
EOG090F025R	scaffold_119	1466508	1477176	1353	10669	10555	59.8	55-60%	31.31	30.1	1	1
EOG090F04EB	scaffold_119	1712276	1726386	1620	14111	13917	37.3	35-40%	44.85	37.8	1.2	1
EOG090F0509	scaffold_119	1535793	1569660	1422	33868	33321	41.3	40-45%	43.42	37.1	1.2	1
EOG090F05D7	scaffold_119	58558	65984	1305	7427	6990	49.2	45-50%	38.96	35.4	1.1	1
EOG090F06D3	scaffold_119	295288	315454	1395	20167	19628	53.1	50-55%	37.02	32.7	1.1	1
EOG090F06PF	scaffold_119	2168505	2175379	1116	6875	6838	42	40-45%	40.68	37.1	1.1	1
EOG090F083X	scaffold_119	1002386	1043424	987	41039	36943	46	45-50%	41.7	35.4	1.2	1
EOG090F094J	scaffold_119	941322	947163	777	5842	5829	45.6	45-50%	42.18	35.4	1.2	1
EOG090F0AWY	scaffold_119	2394437	2400849	486	6413	6370	49.6	45-50%	38.31	35.4	1.1	1
EOG090F0B7E	scaffold_119	1048180	1053653	471	5474	5285	47.9	45-50%	41.29	35.4	1.2	1
EOG090F00IG	scaffold_12	12188834	12229468	4971	40635	39426	37	35-40%	42.34	37.8	1.1	1
EOG090F00TP	scaffold_12	12032492	12046003	3531	13512	13388	41.4	40-45%	45.48	37.1	1.2	1
EOG090F01O7	scaffold_12	2034570	2048993	2553	14424	14150	43.6	40-45%	42.25	37.1	1.1	1
EOG090F020A	scaffold_12	4846858	4926426	2273	79569	72413	37.9	35-40%	43.05	37.8	1.1	1
EOG090F0219	scaffold_12	10723441	10765351	2385	41911	39548	37.6	35-40%	42.75	37.8	1.1	1
EOG090F023F	scaffold_12	2576242	2600357	2298	24116	23529	36.2	35-40%	43.8	37.8	1.2	1
EOG090F023Z	scaffold_12	6520735	6550445	2181	29711	28058	36.7	35-40%	42.83	37.8	1.1	1
EOG090F026N	scaffold_12	13730744	13807222	3414	76479	70883	40	40-45%	42.49	37.1	1.1	1
EOG090F02RW	scaffold_12	2216548	2222953	2019	6406	6040	56.4	55-60%	36.48	30.1	1.2	1
EOG090F02ZS	scaffold_12	12757050	12783645	2028	26596	25972	36.3	35-40%	43.36	37.8	1.1	1
EOG090F032M	scaffold_12	6461803	6515549	1899	53747	51035	35.8	35-40%	43.69	37.8	1.2	1
EOG090F03HV	scaffold_12	2235162	2250174	1725	15013	14880	52.3	50-55%	39.51	32.7	1.2	1
EOG090F03IL	scaffold_12	13827614	13836706	1866	9093	8940	44	40-45%	40.52	37.1	1.1	1
EOG090F03UC	scaffold_12	16037652	16063820	1893	26169	25635	39.5	35-40%	43.21	37.8	1.1	1
EOG090F03X0	scaffold_12	6398944	6422015	1560	23072	22961	37.4	35-40%	44.46	37.8	1.2	1
EOG090F041N	scaffold_12	2382611	2393422	1563	10812	9836	44.5	40-45%	41.79	37.1	1.1	1
EOG090F044Y	scaffold_12	12146108	12159741	1371	13634	13021	39.4	35-40%	42.65	37.8	1.1	1
EOG090F049S	scaffold_12	452023	468622	1617	16600	15499	39	35-40%	42	37.8	1.1	1
EOG090F04BC	scaffold_12	347205	440728	1575	93524	86329	47.4	45-50%	41.88	35.4	1.2	1
EOG090F04C9	scaffold_12	4369207	4380783	1515	11577	11451	36.9	35-40%	44.81	37.8	1.2	1
EOG090F04CJ	scaffold_12	11504634	11506217	1584	1584	1582	42.9	40-45%	44.8	37.1	1.2	1
EOG090F04LC	scaffold_12	4277406	4330478	1626	53073	50783	39.2	35-40%	43.12	37.8	1.1	1
EOG090F04YV	scaffold_12	15844727	15856669	1440	11943	11800	40	40-45%	41.67	37.1	1.1	1
EOG090F052S	scaffold_12	628282	641595	1479	13314	13205	49.2	45-50%	41.54	35.4	1.2	1
EOG090F0590	scaffold_12	1361430	1392669	1440	31240	29172	41.3	40-45%	43.19	37.1	1.2	1
EOG090F05AG	scaffold_12	2405624	2426754	1470	21131	20887	41.9	40-45%	41.84	37.1	1.1	1
EOG090F05EQ	scaffold_12	4330816	4347091	1353	16276	14327	38.9	35-40%	43	37.8	1.1	1
EOG090F05GU	scaffold_12	14271579	14348325	1212	76747	73536	42.6	40-45%	43.57	37.1	1.2	1
EOG090F05KM	scaffold_12	3208096	3256884	1098	48789	46926	36.7	35-40%	44.22	37.8	1.2	1
EOG090F05MF	scaffold_12	2432209	2440154	1248	7946	6592	42.7	40-45%	43.64	37.1	1.2	1
EOG090F05WS	scaffold_12	2474095	2492923	1497	18829	18179	39.9	35-40%	41.66	37.8	1.1	1
EOG090F05YL	scaffold_12	2450482	2468627	1404	18146	17632	40.8	40-45%	43.69	37.1	1.2	1
EOG090F06L1	scaffold_12	14000093	14027465	1512	27373	26029	47	45-50%	41.21	35.4	1.2	1
EOG090F06MI	scaffold_12	1940020	1955750	1383	15731	15383	48.5	45-50%	40.62	35.4	1.1	1
EOG090F06PX	scaffold_12	2543768	2552901	2082	9134	8663	40.1	40-45%	41.7	37.1	1.1	1
EOG090F06QA	scaffold_12	12816501	12826244	1068	9744	9660	46.3	45-50%	40.42	35.4	1.1	1
EOG090F06VD	scaffold_12	473460	487087	1110	13628	12414	42	40-45%	41.54	37.1	1.1	1
EOG090F06W9	scaffold_12	2858732	2864089	1200	5358	5115	45.5	45-50%	39.02	35.4	1.1	1
EOG090F078H	scaffold_12	12801269	12810438	948	9170	8835	36.1	35-40%	41.52	37.8	1.1	1
EOG090F07DE	scaffold_12	12908271	12931086	1071	22816	21732	41.7	40-45%	41.92	37.1	1.1	1
EOG090F07H6	scaffold_12	1492160	1505677	1239	13518	12593	50.1	50-55%	41.37	32.7	1.3	1
EOG090F07QL	scaffold_12	3809782	3825215	1026	15434	14863	37.2	35-40%	43.24	37.8	1.1	1
EOG090F07RZ	scaffold_12	11394080	11403310	669	9231	8671	35.9	35-40%	45.95	37.8	1.2	1
EOG090F07V3	scaffold_12	4229345	4232242	942	2898	2893	50.6	50-55%	35.53	32.7	1.1	1
EOG090F07XO	scaffold_12	3540741	3575543	1104	34803	31808	36.4	35-40%	44.03	37.8	1.2	1
EOG090F0848	scaffold_12	14132585	14151428	813	18844	18116	45.9	45-50%	41.52	35.4	1.2	1
EOG090F085I	scaffold_12	4013752	4036372	876	22621	22223	37.6	35-40%	42.69	37.8	1.1	1
EOG090F08AW	scaffold_12	792142	797214	828	5073	4549	47.7	45-50%	41.27	35.4	1.2	1
EOG090F08DQ	scaffold_12	4385804	4408100	831	22297	21515	38.7	35-40%	42.28	37.8	1.1	1
EOG090F08L4	scaffold_12	656904	664100	957	7197	7047	46.1	45-50%	40.91	35.4	1.2	1
EOG090F08LH	scaffold_12	13965105	13987634	918	22530	18668	37.3	35-40%	42.88	37.8	1.1	1
EOG090F08R4	scaffold_12	4261486	4273472	741	11987	11072	39.5	35-40%	41.93	37.8	1.1	1
EOG090F09CL	scaffold_12	4583241	4588882	819	5642	5448	42.3	40-45%	40.36	37.1	1.1	1
EOG090F09EG	scaffold_12	12788078	12800654	1002	12577	11529	41.4	40-45%	41.7	37.1	1.1	1
EOG090F09JM	scaffold_12	14688921	14700152	876	11232	10525	40	40-45%	39.59	37.1	1.1	1
EOG090F09KK	scaffold_12	680995	690196	720	9202	9187	47.6	45-50%	42.04	35.4	1.2	1
EOG090F09OI	scaffold_12	2025218	2029373	597	4156	4108	43.9	40-45%	41.97	37.1	1.1	1
EOG090F09OP	scaffold_12	8727031	8755741	504	28711	27629	36.3	35-40%	41.73	37.8	1.1	1
EOG090F09YV	scaffold_12	10877870	10878424	555	555	555	50.1	50-55%	39.2	32.7	1.2	1
EOG090F09ZK	scaffold_12	12897318	12907862	699	10545	10242	40.9	40-45%	41.71	37.1	1.1	1
EOG090F0A2K	scaffold_12	12308442	12313992	516	5551	5240	52.2	50-55%	38.78	32.7	1.2	1
EOG090F0A9Q	scaffold_12	13054643	13055146	504	504	504	51	50-55%	44.95	32.7	1.4	1
EOG090F0ABD	scaffold_12	1439083	1460642	600	21560	21059	45.9	45-50%	42.29	35.4	1.2	1
EOG090F0AJ5	scaffold_12	4348930	4364424	672	15495	14943	40.8	40-45%	40.96	37.1	1.1	1
EOG090F0AL7	scaffold_12	4524863	4527031	501	2169	2132	53.7	50-55%	33.92	32.7	1	1
EOG090F0AMN	scaffold_12	13578076	13591184	834	13109	12132	37.5	35-40%	40.87	37.8	1.1	1
EOG090F0AOV	scaffold_12	1872217	1874451	1500	2235	2171	52.3	50-55%	40.17	32.7	1.2	1
EOG090F0AP5	scaffold_12	2554272	2559213	477	4942	4892	37.2	35-40%	46.29	37.8	1.2	1
EOG090F0AQX	scaffold_12	1822251	1836138	669	13888	13153	47.8	45-50%	40.67	35.4	1.1	1
EOG090F0B2Q	scaffold_12	6295725	6310899	420	15175	14904	39.8	35-40%	42.73	37.8	1.1	1
EOG090F0B6O	scaffold_12	12828444	12832345	432	3902	3888	46.2	45-50%	41.15	35.4	1.2	1
EOG090F0B6Q	scaffold_12	2150670	2152100	453	1431	1357	58.4	55-60%	34.58	30.1	1.1	1
EOG090F0B77	scaffold_12	12047151	12065109	555	17959	17045	37.1	35-40%	45.04	37.8	1.2	1
EOG090F0BAM	scaffold_12	6124797	6133815	504	9019	8555	39.4	35-40%	44.81	37.8	1.2	1
EOG090F0BDB	scaffold_12	2156866	2157912	540	1047	1045	61.4	60-65%	30.01	27.7	1.1	1
EOG090F0BET	scaffold_12	1917194	1919844	366	2651	2345	66	65-70%	31.26	26.7	1.2	1
EOG090F0BIK	scaffold_12	11523022	11545288	1740	22267	18330	36.7	35-40%	42.19	37.8	1.1	1
EOG090F0BN9	scaffold_12	730116	734587	486	4472	3940	59	55-60%	37.41	30.1	1.2	1
EOG090F0BQ4	scaffold_12	13956434	13964127	315	7694	7643	40	40-45%	42.91	37.1	1.2	1
EOG090F0C80	scaffold_12	4792778	4813918	384	21141	20509	44	40-45%	42.63	37.1	1.1	1
EOG090F0C8C	scaffold_12	12231507	12233980	363	2474	2427	40.3	40-45%	42.44	37.1	1.1	1
EOG090F0CQ5	scaffold_12	1658243	1660284	423	2042	2041	54.6	50-55%	36.15	32.7	1.1	1
EOG090F0CQR	scaffold_12	2377985	2382167	342	4183	3934	40.3	40-45%	40.99	37.1	1.1	1
EOG090F02S6	scaffold_120	1057531	1076026	1257	18496	18225	40.8	40-45%	43.76	37.1	1.2	1
EOG090F036E	scaffold_120	428150	432827	1845	4678	4643	37.6	35-40%	41.84	37.8	1.1	1
EOG090F047G	scaffold_120	1506610	1515372	1368	8763	8763	36.3	35-40%	41.89	37.8	1.1	1
EOG090F06KB	scaffold_120	2430243	2467425	2691	37183	36960	42.2	40-45%	42.69	37.1	1.2	1
EOG090F079M	scaffold_120	1238711	1259229	1185	20519	19979	42.1	40-45%	40.33	37.1	1.1	1
EOG090F08G8	scaffold_120	441881	478365	891	36485	29309	36	35-40%	42.51	37.8	1.1	1
EOG090F0B1J	scaffold_120	1284797	1295174	651	10378	9146	40.8	40-45%	41.32	37.1	1.1	1
EOG090F0C4E	scaffold_120	1908471	1908947	477	477	477	56.2	55-60%	39.56	30.1	1.3	1
EOG090F05C5	scaffold_122	2404260	2429166	1302	24907	24710	43.8	40-45%	43.09	37.1	1.2	1
EOG090F05SR	scaffold_122	1077709	1087542	1425	9834	9785	54	50-55%	36.09	32.7	1.1	1
EOG090F081I	scaffold_122	2261718	2272732	948	11015	10823	41	40-45%	41.68	37.1	1.1	1
EOG090F09WP	scaffold_122	1695659	1706649	531	10991	9696	46.9	45-50%	38.45	35.4	1.1	1
EOG090F0BV3	scaffold_122	1738256	1757348	606	19093	18427	42.9	40-45%	40.37	37.1	1.1	1
EOG090F014S	scaffold_123	2397726	2419560	3564	21835	21522	38	35-40%	43.42	37.8	1.1	1
EOG090F03ER	scaffold_123	599926	618308	2010	18383	18349	38.2	35-40%	43.64	37.8	1.2	1
EOG090F046A	scaffold_123	1968818	1979814	1743	10997	10493	37	35-40%	41.02	37.8	1.1	1
EOG090F05U8	scaffold_123	2175645	2194114	1524	18470	17227	38.5	35-40%	43.4	37.8	1.1	1
EOG090F060M	scaffold_123	2080209	2096655	2358	16447	15432	41.5	40-45%	42.85	37.1	1.2	1
EOG090F071B	scaffold_123	587414	598302	1005	10889	10488	38.5	35-40%	42.19	37.8	1.1	1
EOG090F07U0	scaffold_123	619735	629724	885	9990	9869	37.1	35-40%	43.66	37.8	1.2	1
EOG090F08E3	scaffold_123	2359014	2367400	948	8387	8317	42	40-45%	41.71	37.1	1.1	1
EOG090F08X3	scaffold_123	1994911	1997122	855	2212	2160	49	45-50%	43.45	35.4	1.2	1
EOG090F0A9O	scaffold_123	1963829	1967371	582	3543	3000	40	40-45%	41.91	37.1	1.1	1
EOG090F0AS3	scaffold_123	2035234	2045023	492	9790	9597	37.8	35-40%	44.43	37.8	1.2	1
EOG090F025E	scaffold_124	819203	827312	2496	8110	8051	40.5	40-45%	40.84	37.1	1.1	1
EOG090F0274	scaffold_124	1227447	1280322	2436	52876	50910	40.8	40-45%	44.65	37.1	1.2	1
EOG090F06DP	scaffold_124	1012531	1041650	1011	29120	24399	35.7	35-40%	43.31	37.8	1.1	1
EOG090F06H6	scaffold_124	2083576	2085758	1116	2183	2109	37.2	35-40%	43.13	37.8	1.1	1
EOG090F09PM	scaffold_124	2161162	2163614	648	2453	2038	36.9	35-40%	42.1	37.8	1.1	1
EOG090F0AAD	scaffold_124	912372	918922	651	6551	6038	36.6	35-40%	41.67	37.8	1.1	1
EOG090F028C	scaffold_125	717530	735367	2226	17838	16090	37.5	35-40%	42.21	37.8	1.1	1
EOG090F04CW	scaffold_125	994306	1007692	1350	13387	13190	35.9	35-40%	41.14	37.8	1.1	1
EOG090F01A8	scaffold_126	1687705	1756122	2937	68418	54183	36.1	35-40%	41.34	37.8	1.1	1
EOG090F05P8	scaffold_126	2041174	2055352	1299	14179	12442	35.8	35-40%	41.19	37.8	1.1	1
EOG090F0796	scaffold_126	1588995	1593504	981	4510	4500	44.6	40-45%	40.25	37.1	1.1	1
EOG090F082S	scaffold_126	1594018	1603696	1038	9679	9502	41.1	40-45%	37.82	37.1	1	1
EOG090F0AXB	scaffold_126	1556900	1565158	600	8259	7945	36.8	35-40%	42.39	37.8	1.1	1
EOG090F01Q7	scaffold_127	2298116	2407215	2028	109100	95480	38.5	35-40%	73.18	37.8	1.9	2
EOG090F05GR	scaffold_127	513832	515100	1269	1269	1266	48.9	45-50%	40.64	35.4	1.1	1
EOG090F05UM	scaffold_127	1093734	1106024	1275	12291	12061	42.5	40-45%	42.34	37.1	1.1	1
EOG090F07QU	scaffold_127	6473	24735	975	18263	16930	44.5	40-45%	40.57	37.1	1.1	1
EOG090F097T	scaffold_127	1877350	1884938	720	7589	7533	43.4	40-45%	41.28	37.1	1.1	1
EOG090F098A	scaffold_127	500738	506847	705	6110	5995	39.5	35-40%	42.64	37.8	1.1	1
EOG090F0A3U	scaffold_127	1823149	1836697	747	13549	12797	37.8	35-40%	43.03	37.8	1.1	1
EOG090F02A0	scaffold_128	1084545	1104341	2352	19797	19471	37.5	35-40%	42.55	37.8	1.1	1
EOG090F03Q9	scaffold_128	1731693	1740486	1683	8794	8573	36.6	35-40%	42.07	37.8	1.1	1
EOG090F094Y	scaffold_128	1104685	1116950	804	12266	10097	39.6	35-40%	41.23	37.8	1.1	1
EOG090F095N	scaffold_128	886745	898604	963	11860	11473	41.4	40-45%	41.34	37.1	1.1	1
EOG090F0B8W	scaffold_128	998101	1021127	414	23027	21508	39.5	35-40%	42.87	37.8	1.1	1
EOG090F0194	scaffold_129	2257892	2267796	3498	9905	9022	44.7	40-45%	40.46	37.1	1.1	1
EOG090F03R9	scaffold_129	2330981	2356919	1911	25939	23625	47.1	45-50%	40.75	35.4	1.2	1
EOG090F0783	scaffold_129	52744	70276	1092	17533	17011	39.1	35-40%	42.63	37.8	1.1	1
EOG090F08CF	scaffold_129	1950690	1971804	759	21115	20285	42.6	40-45%	40.44	37.1	1.1	1
EOG090F08I1	scaffold_129	2275208	2285766	876	10559	10185	43.5	40-45%	41.76	37.1	1.1	1
EOG090F0AZL	scaffold_129	2098723	2109025	498	10303	10117	48.8	45-50%	41.77	35.4	1.2	1
EOG090F0BE9	scaffold_129	1935541	1943643	393	8103	7909	42.8	40-45%	41.72	37.1	1.1	1
EOG090F007I	scaffold_13	11611714	11670766	5958	59053	57092	45	45-50%	42.54	35.4	1.2	1
EOG090F00JF	scaffold_13	5867591	5904738	4173	37148	36625	36.9	35-40%	42.28	37.8	1.1	1
EOG090F00SA	scaffold_13	419249	435145	3672	15897	14748	43.6	40-45%	44.85	37.1	1.2	1
EOG090F00UC	scaffold_13	10884773	10904967	4809	20195	19110	40.8	40-45%	42.2	37.1	1.1	1
EOG090F00XI	scaffold_13	10645046	10698760	3657	53715	52908	41	40-45%	44.73	37.1	1.2	1
EOG090F017A	scaffold_13	5160968	5338591	3096	177624	168880	35.9	35-40%	44.32	37.8	1.2	1
EOG090F018A	scaffold_13	11996547	12011476	3297	14930	14846	53.8	50-55%	36.34	32.7	1.1	1
EOG090F01AB	scaffold_13	7234864	7257888	3939	23025	21942	36.6	35-40%	42.07	37.8	1.1	1
EOG090F01AH	scaffold_13	2707485	2712813	2397	5329	5036	51.9	50-55%	39.54	32.7	1.2	1
EOG090F01AK	scaffold_13	12792318	12809496	3159	17179	17068	38.2	35-40%	43.87	37.8	1.2	1
EOG090F01D2	scaffold_13	2754043	2783233	3462	29191	28943	38.8	35-40%	44.93	37.8	1.2	1
EOG090F01DQ	scaffold_13	644096	681564	4017	37469	36874	41.9	40-45%	42.78	37.1	1.2	1
EOG090F01JS	scaffold_13	12310257	12332375	2682	22119	20694	44.6	40-45%	41.11	37.1	1.1	1
EOG090F02BU	scaffold_13	12071306	12125958	2145	54653	54021	49.8	45-50%	39.34	35.4	1.1	1
EOG090F02BX	scaffold_13	1865725	1914203	2397	48479	43679	43	40-45%	43.02	37.1	1.2	1
EOG090F02RM	scaffold_13	62791	123146	1863	60356	56952	41.8	40-45%	43.76	37.1	1.2	1
EOG090F030M	scaffold_13	13747368	13751892	1884	4525	4487	51.7	50-55%	38.41	32.7	1.2	1
EOG090F03D6	scaffold_13	12366553	12381674	1992	15122	15075	44.8	40-45%	42.31	37.1	1.1	1
EOG090F03UX	scaffold_13	442459	465004	1866	22546	21321	43.7	40-45%	41.43	37.1	1.1	1
EOG090F03WB	scaffold_13	13686560	13720071	1728	33512	32670	39.3	35-40%	41.79	37.8	1.1	1
EOG090F043N	scaffold_13	12877602	12888939	1695	11338	11147	35.7	35-40%	45.23	37.8	1.2	1
EOG090F044L	scaffold_13	11917087	11938791	1929	21705	21573	39.4	35-40%	40.25	37.8	1.1	1
EOG090F04A8	scaffold_13	11889497	11902520	1527	13024	12990	47.7	45-50%	40.93	35.4	1.2	1
EOG090F04AR	scaffold_13	11548650	11582613	1539	33964	33468	44	40-45%	42.18	37.1	1.1	1
EOG090F04BR	scaffold_13	7614101	7641405	1392	27305	26511	38.6	35-40%	43.15	37.8	1.1	1
EOG090F04IK	scaffold_13	15283516	15291644	1524	8129	7673	48	45-50%	36.37	35.4	1	1
EOG090F04TN	scaffold_13	2109660	2139912	1656	30253	29033	46.6	45-50%	41.27	35.4	1.2	1
EOG090F057O	scaffold_13	3965741	3971204	1251	5464	5459	37.3	35-40%	41.1	37.8	1.1	1
EOG090F05DK	scaffold_13	7163079	7201648	1542	38570	35844	40.9	40-45%	42.57	37.1	1.1	1
EOG090F05GD	scaffold_13	3258603	3265456	1302	6854	6826	40	40-45%	44.42	37.1	1.2	1
EOG090F05HU	scaffold_13	112626	134351	1470	21726	21456	37.9	35-40%	44.18	37.8	1.2	1
EOG090F05O7	scaffold_13	467956	510139	1386	42184	40788	43.5	40-45%	41.78	37.1	1.1	1
EOG090F05Y5	scaffold_13	14718256	14741639	1317	23384	22579	43.7	40-45%	39.07	37.1	1.1	1
EOG090F06BD	scaffold_13	10579548	10606036	1101	26489	25838	38.8	35-40%	44.78	37.8	1.2	1
EOG090F06EF	scaffold_13	10393481	10400112	1299	6632	6617	43.1	40-45%	41.58	37.1	1.1	1
EOG090F06HA	scaffold_13	388067	399580	1200	11514	11168	40.4	40-45%	42.55	37.1	1.1	1
EOG090F06JB	scaffold_13	13148815	13149789	975	975	974	53.2	50-55%	32.01	32.7	1	1
EOG090F06KF	scaffold_13	1096617	1104176	1050	7560	7346	43.4	40-45%	43.53	37.1	1.2	1
EOG090F06NE	scaffold_13	12336312	12346183	1098	9872	9782	46.8	45-50%	38.75	35.4	1.1	1
EOG090F06PU	scaffold_13	984936	1003320	1083	18385	18137	50.3	50-55%	40.34	32.7	1.2	1
EOG090F074Z	scaffold_13	14500989	14523869	918	22881	22466	41.3	40-45%	40.78	37.1	1.1	1
EOG090F0774	scaffold_13	11446604	11464900	957	18297	17567	37.7	35-40%	42.02	37.8	1.1	1
EOG090F077M	scaffold_13	12025371	12034036	993	8666	8558	44.8	40-45%	37.69	37.1	1	1
EOG090F07FE	scaffold_13	12871297	12877104	1158	5808	5714	42.9	40-45%	42.72	37.1	1.2	1
EOG090F07FF	scaffold_13	11902804	11912423	930	9620	9590	43.5	40-45%	41.3	37.1	1.1	1
EOG090F07L9	scaffold_13	13733359	13745605	1008	12247	10692	54.2	50-55%	35.48	32.7	1.1	1
EOG090F07PZ	scaffold_13	11983168	11988724	1122	5557	5539	42.5	40-45%	37.75	37.1	1	1
EOG090F07QP	scaffold_13	795631	815673	1617	20043	18788	43.4	40-45%	42.35	37.1	1.1	1
EOG090F084O	scaffold_13	2482274	2486704	675	4431	4422	43.6	40-45%	41.56	37.1	1.1	1
EOG090F089U	scaffold_13	3994398	4005576	891	11179	10965	37.2	35-40%	42.91	37.8	1.1	1
EOG090F08A0	scaffold_13	2680794	2699746	1404	18953	18768	42.3	40-45%	43.6	37.1	1.2	1
EOG090F08FO	scaffold_13	586342	587475	1134	1134	1134	42.8	40-45%	43.45	37.1	1.2	1
EOG090F08FW	scaffold_13	1578221	1585202	855	6982	6829	48.2	45-50%	40.14	35.4	1.1	1
EOG090F08JI	scaffold_13	8074271	8096804	813	22534	21497	38	35-40%	43.73	37.8	1.2	1
EOG090F08RV	scaffold_13	12810856	12832055	810	21200	20636	40	40-45%	41.43	37.1	1.1	1
EOG090F08TW	scaffold_13	13372174	13392090	945	19917	19617	38.7	35-40%	43.25	37.8	1.1	1
EOG090F08YN	scaffold_13	1793679	1800421	879	6743	6613	51.6	50-55%	38.13	32.7	1.2	1
EOG090F090B	scaffold_13	11776037	11790740	738	14704	13484	48.7	45-50%	38.23	35.4	1.1	1
EOG090F098Y	scaffold_13	8049031	8050816	504	1786	1786	42.2	40-45%	37.59	37.1	1	1
EOG090F09D3	scaffold_13	12460426	12477582	651	17157	15730	44.8	40-45%	42.56	37.1	1.1	1
EOG090F09MW	scaffold_13	10624718	10636082	603	11365	11117	39.2	35-40%	44.73	37.8	1.2	1
EOG090F0AHM	scaffold_13	11940830	11944545	1341	3716	3624	51.1	50-55%	32.39	32.7	1	1
EOG090F0AJB	scaffold_13	1090743	1094095	468	3353	3350	43.7	40-45%	43.66	37.1	1.2	1
EOG090F0ASK	scaffold_13	8028105	8031247	549	3143	3106	40.6	40-45%	41.21	37.1	1.1	1
EOG090F0B2H	scaffold_13	14642402	14652888	756	10487	10179	46.6	45-50%	39.53	35.4	1.1	1
EOG090F0BRU	scaffold_13	5905525	5907494	399	1970	1969	45	45-50%	43.46	35.4	1.2	1
EOG090F0BXS	scaffold_13	608657	616575	243	7919	7576	42.4	40-45%	42.95	37.1	1.2	1
EOG090F0C0K	scaffold_13	907975	911129	426	3155	3153	43.3	40-45%	39.56	37.1	1.1	1
EOG090F0CLN	scaffold_13	15273333	15276398	1026	3066	2765	79.3	75-80%	15.29	20.9	0.7	1
EOG090F0D0S	scaffold_13	7143395	7155590	288	12196	11929	41.2	40-45%	42.44	37.1	1.1	1
EOG090F01L2	scaffold_130	532100	544023	2352	11924	11748	41.7	40-45%	44	37.1	1.2	1
EOG090F04ZA	scaffold_130	646985	648361	1377	1377	1377	40.4	40-45%	40.75	37.1	1.1	1
EOG090F05LB	scaffold_130	332052	368518	1443	36467	33452	36.8	35-40%	41.78	37.8	1.1	1
EOG090F0BDC	scaffold_130	132170	136361	381	4192	4027	42.1	40-45%	39.27	37.1	1.1	1
EOG090F0C8B	scaffold_130	251821	269018	273	17198	16569	38	35-40%	41.69	37.8	1.1	1
EOG090F012S	scaffold_131	302054	345271	3423	43218	40528	42.5	40-45%	41.92	37.1	1.1	1
EOG090F01UV	scaffold_131	669682	695086	3045	25405	23905	44.7	40-45%	42	37.1	1.1	1
EOG090F02R2	scaffold_131	751274	774094	2238	22821	21743	50.7	50-55%	38.05	32.7	1.2	1
EOG090F02VV	scaffold_131	375325	451863	2022	76539	73518	38.8	35-40%	44.09	37.8	1.2	1
EOG090F02WV	scaffold_131	724829	745315	2127	20487	19664	42.9	40-45%	40.89	37.1	1.1	1
EOG090F03ZH	scaffold_131	2239552	2241722	1308	2171	2104	55.4	55-60%	34.37	30.1	1.1	1
EOG090F040A	scaffold_131	275947	292427	1740	16481	15383	39.8	35-40%	43.74	37.8	1.2	1
EOG090F04A4	scaffold_131	363462	371100	1620	7639	7417	42.5	40-45%	43.33	37.1	1.2	1
EOG090F04M6	scaffold_131	2117533	2124118	1833	6586	5925	40.4	40-45%	42.86	37.1	1.2	1
EOG090F04TI	scaffold_131	1621660	1630221	1404	8562	7532	49	45-50%	40.27	35.4	1.1	1
EOG090F04UF	scaffold_131	234084	263042	1908	28959	27740	41.6	40-45%	43.17	37.1	1.2	1
EOG090F0502	scaffold_131	702651	715746	1356	13096	13056	44.6	40-45%	42.02	37.1	1.1	1
EOG090F051G	scaffold_131	2129021	2153873	1470	24853	23237	41.6	40-45%	41.77	37.1	1.1	1
EOG090F05JJ	scaffold_131	18771	20006	1236	1236	1236	45.7	45-50%	33.86	35.4	1	1
EOG090F05OD	scaffold_131	1317216	1326344	1188	9129	9056	51	50-55%	39.28	32.7	1.2	1
EOG090F06N2	scaffold_131	2105055	2109031	1065	3977	3972	42.5	40-45%	43.31	37.1	1.2	1
EOG090F08R2	scaffold_131	2009282	2011272	906	1991	1985	53	50-55%	36.69	32.7	1.1	1
EOG090F0956	scaffold_131	1352615	1360012	780	7398	7272	46.3	45-50%	40.44	35.4	1.1	1
EOG090F098B	scaffold_131	2200499	2207148	723	6650	6634	44.9	40-45%	40.48	37.1	1.1	1
EOG090F09DB	scaffold_131	2068782	2074633	753	5852	5488	46.3	45-50%	41.89	35.4	1.2	1
EOG090F09TO	scaffold_131	1665140	1670830	717	5691	4888	52.6	50-55%	32.36	32.7	1	1
EOG090F0A0K	scaffold_131	695405	702260	771	6856	6782	55.3	55-60%	35.82	30.1	1.2	1
EOG090F0AGE	scaffold_131	2320104	2338570	498	18467	18210	45.1	45-50%	37.74	35.4	1.1	1
EOG090F0AKA	scaffold_131	2077822	2078337	516	516	516	49.2	45-50%	34.82	35.4	1	1
EOG090F00K9	scaffold_132	650630	733331	4734	82702	76270	34.8	30-35%	42.69	37.8	1.1	1
EOG090F0454	scaffold_132	1118687	1120255	1569	1569	1419	49.9	45-50%	37.56	35.4	1.1	1
EOG090F056J	scaffold_132	1216657	1274505	1586	57849	55430	39.2	35-40%	42.35	37.8	1.1	1
EOG090F05DJ	scaffold_132	269775	347885	1392	78111	74170	39.4	35-40%	42.93	37.8	1.1	1
EOG090F0AC0	scaffold_132	1316360	1328464	582	12105	12021	40.8	40-45%	39.24	37.1	1.1	1
EOG090F0B5G	scaffold_132	193458	200134	423	6677	6673	41.8	40-45%	41.55	37.1	1.1	1
EOG090F0C39	scaffold_132	1355417	1358703	354	3287	3185	42.1	40-45%	41.73	37.1	1.1	1
EOG090F00M2	scaffold_133	278605	310590	3510	31986	23869	36.5	35-40%	39.68	37.8	1	1
EOG090F01YS	scaffold_133	2252378	2282297	2313	29920	26577	35.8	35-40%	41.78	37.8	1.1	1
EOG090F020B	scaffold_133	2082739	2130080	2574	47342	36298	37.4	35-40%	49.6	37.8	1.3	1
EOG090F038P	scaffold_133	1351689	1368762	1434	17074	16659	45.3	45-50%	40.64	35.4	1.1	1
EOG090F050M	scaffold_133	1583034	1596639	1497	13606	12622	52.2	50-55%	37.76	32.7	1.2	1
EOG090F05W0	scaffold_133	1635839	1657753	1359	21915	21831	39	35-40%	41.57	37.8	1.1	1
EOG090F07Y8	scaffold_133	1188772	1217819	969	29048	27781	50.1	50-55%	38.8	32.7	1.2	1
EOG090F08CL	scaffold_133	1051041	1097999	2352	46959	45166	47.7	45-50%	40.5	35.4	1.1	1
EOG090F08J4	scaffold_133	1819115	1826370	723	7256	6829	44.2	40-45%	42.53	37.1	1.1	1
EOG090F0CUS	scaffold_133	1135828	1140911	375	5084	5008	45.4	45-50%	38.33	35.4	1.1	1
EOG090F03JZ	scaffold_134	1017856	1023401	2013	5546	5448	43.6	40-45%	44.16	37.1	1.2	1
EOG090F05K4	scaffold_134	1984875	2012370	1023	27496	23383	35.6	35-40%	43.63	37.8	1.2	1
EOG090F02Q5	scaffold_135	1830972	1875643	2121	44672	42748	34.7	30-35%	41.65	37.8	1.1	1
EOG090F00QX	scaffold_136	286685	314963	3654	28279	28107	45.8	45-50%	39.55	35.4	1.1	1
EOG090F00ZK	scaffold_136	165336	211459	3144	46124	44313	41.9	40-45%	42.34	37.1	1.1	1
EOG090F017B	scaffold_136	25694	73869	2922	48176	46015	47.7	45-50%	39.85	35.4	1.1	1
EOG090F01JC	scaffold_136	217919	237278	2640	19360	17852	43.9	40-45%	42.13	37.1	1.1	1
EOG090F0225	scaffold_136	597944	600238	2295	2295	2293	43.8	40-45%	44.03	37.1	1.2	1
EOG090F04SK	scaffold_136	1412450	1432981	1959	20532	19346	44.7	40-45%	41.59	37.1	1.1	1
EOG090F059F	scaffold_136	94653	99332	1461	4680	4665	53.2	50-55%	37.39	32.7	1.1	1
EOG090F05ML	scaffold_136	639124	650737	1263	11614	11107	55.3	55-60%	34.44	30.1	1.1	1
EOG090F07QT	scaffold_136	1259027	1271326	1194	12300	11562	51.1	50-55%	36.92	32.7	1.1	1
EOG090F0802	scaffold_136	611238	621346	882	10109	9874	45.8	45-50%	39.49	35.4	1.1	1
EOG090F08AB	scaffold_136	1878480	1886575	951	8096	7909	49.7	45-50%	35.8	35.4	1	1
EOG090F08BY	scaffold_136	1871434	1875974	927	4541	4522	46.6	45-50%	37.18	35.4	1.1	1
EOG090F08TY	scaffold_136	1179449	1189846	852	10398	10372	60.3	60-65%	33.2	27.7	1.2	1
EOG090F0BB9	scaffold_136	1382045	1393066	381	11022	10992	41.8	40-45%	42.73	37.1	1.2	1
EOG090F0BBJ	scaffold_136	1592385	1603194	462	10810	10312	41.3	40-45%	40.17	37.1	1.1	1
EOG090F0423	scaffold_137	906918	919382	1635	12465	11185	39.6	35-40%	42.94	37.8	1.1	1
EOG090F0235	scaffold_138	64976	76814	2364	11839	9930	48.7	45-50%	38.48	35.4	1.1	1
EOG090F035K	scaffold_138	537877	557158	1842	19282	17719	52.8	50-55%	34.22	32.7	1	1
EOG090F05RB	scaffold_138	1040414	1041628	1215	1215	1214	55.2	55-60%	42.47	30.1	1.4	1
EOG090F0BIL	scaffold_138	635622	640545	381	4924	4907	47.2	45-50%	38.9	35.4	1.1	1
EOG090F0BMS	scaffold_138	661376	667008	381	5633	5548	52.8	50-55%	37.73	32.7	1.2	1
EOG090F0BNF	scaffold_138	709754	714626	384	4873	4215	49	45-50%	43.11	35.4	1.2	1
EOG090F0BP7	scaffold_138	628271	631782	381	3512	3499	46.3	45-50%	40.89	35.4	1.2	1
EOG090F04IX	scaffold_139	1216264	1233475	1050	17212	16636	38.8	35-40%	42.15	37.8	1.1	1
EOG090F0577	scaffold_139	1958751	1975522	1410	16772	16032	36.2	35-40%	43.75	37.8	1.2	1
EOG090F059N	scaffold_139	1886870	1900790	1272	13921	12802	36.6	35-40%	42.15	37.8	1.1	1
EOG090F06AF	scaffold_139	3987	24716	1002	20730	20131	41.1	40-45%	36.46	37.1	1	1
EOG090F06D8	scaffold_139	20064	50013	1407	29950	28378	40	40-45%	42.68	37.1	1.2	1
EOG090F0794	scaffold_139	1858447	1860394	1182	1948	1945	57.3	55-60%	35.26	30.1	1.2	1
EOG090F086Q	scaffold_139	1113867	1132191	969	18325	17691	41.3	40-45%	44.67	37.1	1.2	1
EOG090F08G0	scaffold_139	1301477	1320769	756	19293	17973	39.5	35-40%	43.66	37.8	1.2	1
EOG090F0AKO	scaffold_139	1840709	1850960	498	10252	10142	40.6	40-45%	41.51	37.1	1.1	1
EOG090F0B0N	scaffold_139	987425	997506	552	10082	9668	38.5	35-40%	40.64	37.8	1.1	1
EOG090F00L4	scaffold_14	1896945	1958507	3687	61563	56979	41.1	40-45%	42.21	37.1	1.1	1
EOG090F00W8	scaffold_14	2054467	2136614	2937	82148	77252	38.8	35-40%	42.6	37.8	1.1	1
EOG090F01A2	scaffold_14	9573215	9614986	4056	41772	39585	37	35-40%	43.02	37.8	1.1	1
EOG090F01C7	scaffold_14	5618599	5662099	3264	43501	42033	39.8	35-40%	42.15	37.8	1.1	1
EOG090F01DT	scaffold_14	12688326	12736149	3747	47824	47536	38.7	35-40%	43.89	37.8	1.2	1
EOG090F01EO	scaffold_14	14465664	14468909	3246	3246	3246	38.6	35-40%	43.83	37.8	1.2	1
EOG090F01GC	scaffold_14	9295216	9317843	2037	22628	22219	36.6	35-40%	41.27	37.8	1.1	1
EOG090F021L	scaffold_14	7982959	7998945	2742	15987	15877	38.3	35-40%	42.51	37.8	1.1	1
EOG090F022Y	scaffold_14	14081028	14101874	2292	20847	19907	36	35-40%	43.48	37.8	1.2	1
EOG090F025N	scaffold_14	9798728	9830889	2397	32162	30750	36.9	35-40%	42.55	37.8	1.1	1
EOG090F0279	scaffold_14	9851450	9894848	2613	43399	36330	38.3	35-40%	40.14	37.8	1.1	1
EOG090F02K5	scaffold_14	11748749	11807323	2406	58575	55907	40	40-45%	43.79	37.1	1.2	1
EOG090F02QJ	scaffold_14	12486654	12554901	2085	68248	61757	38.8	35-40%	42.08	37.8	1.1	1
EOG090F02WF	scaffold_14	11049238	11095139	1950	45902	42641	41.3	40-45%	42.42	37.1	1.1	1
EOG090F039Q	scaffold_14	14353869	14390657	1788	36789	33463	40.2	40-45%	41.2	37.1	1.1	1
EOG090F03CL	scaffold_14	14136835	14151693	1722	14859	14590	38.1	35-40%	42.64	37.8	1.1	1
EOG090F03EC	scaffold_14	2598318	2604631	1992	6314	6291	49.4	45-50%	36.73	35.4	1	1
EOG090F03IU	scaffold_14	10250673	10290185	1965	39513	37917	39.5	35-40%	43.06	37.8	1.1	1
EOG090F03JM	scaffold_14	11315312	11334415	1812	19104	18623	37.2	35-40%	41.97	37.8	1.1	1
EOG090F03K8	scaffold_14	8609812	8638802	2283	28991	25089	37.7	35-40%	41.57	37.8	1.1	1
EOG090F03XR	scaffold_14	2966672	2991585	1608	24914	24142	45.2	45-50%	40.99	35.4	1.2	1
EOG090F04MH	scaffold_14	5822699	5834581	1446	11883	11227	51.2	50-55%	37.37	32.7	1.1	1
EOG090F04YM	scaffold_14	9125116	9131063	1815	5948	5899	35.4	35-40%	44.48	37.8	1.2	1
EOG090F055K	scaffold_14	14156537	14166138	1644	9602	8077	42	40-45%	43.92	37.1	1.2	1
EOG090F05AS	scaffold_14	9660309	9667587	1464	7279	7138	40	40-45%	41.51	37.1	1.1	1
EOG090F05HH	scaffold_14	9747110	9756383	1617	9274	8648	36.2	35-40%	44.59	37.8	1.2	1
EOG090F05MU	scaffold_14	9834140	9859690	1386	25551	21625	43.9	40-45%	40.44	37.1	1.1	1
EOG090F05WX	scaffold_14	5667019	5691778	1512	24760	20257	46.1	45-50%	40.78	35.4	1.2	1
EOG090F0667	scaffold_14	7943730	7976590	2811	32861	28498	41.1	40-45%	40.24	37.1	1.1	1
EOG090F06NO	scaffold_14	6280139	6303763	1218	23625	21150	40.9	40-45%	40.08	37.1	1.1	1
EOG090F06O1	scaffold_14	5962927	5988069	1176	25143	24818	40.6	40-45%	42.41	37.1	1.1	1
EOG090F06YE	scaffold_14	12471512	12473882	1263	2371	2336	52.1	50-55%	36.13	32.7	1.1	1
EOG090F071E	scaffold_14	10325000	10342758	1185	17759	17242	42.9	40-45%	47.67	37.1	1.3	1
EOG090F073E	scaffold_14	14707434	14719973	954	12540	12338	41.1	40-45%	42.83	37.1	1.2	1
EOG090F07BR	scaffold_14	13996291	14038786	903	42496	39074	36.6	35-40%	42.35	37.8	1.1	1
EOG090F086L	scaffold_14	5554855	5572760	1101	17906	17375	39.9	35-40%	41.68	37.8	1.1	1
EOG090F08JP	scaffold_14	8959859	8988128	867	28270	26591	49.1	45-50%	37.49	35.4	1.1	1
EOG090F094H	scaffold_14	10064777	10084419	780	19643	17028	38.2	35-40%	43.22	37.8	1.1	1
EOG090F09A5	scaffold_14	7925884	7935144	777	9261	9127	40.5	40-45%	40.92	37.1	1.1	1
EOG090F09DZ	scaffold_14	5587343	5610726	705	23384	23083	48	45-50%	40.64	35.4	1.1	1
EOG090F09UW	scaffold_14	15321482	15389311	1878	67830	61627	35.5	35-40%	42.8	37.8	1.1	1
EOG090F09YA	scaffold_14	12459627	12465199	669	5573	5410	42.8	40-45%	40.75	37.1	1.1	1
EOG090F0A7W	scaffold_14	8819258	8831847	330	12590	12059	41.7	40-45%	42.63	37.1	1.1	1
EOG090F0ALA	scaffold_14	6102426	6136319	678	33894	31573	44.8	40-45%	42.46	37.1	1.1	1
EOG090F0ARL	scaffold_14	5928359	5934350	606	5992	5930	52.8	50-55%	36.84	32.7	1.1	1
EOG090F0AZ8	scaffold_14	14126115	14130975	525	4861	4540	39.5	35-40%	44.18	37.8	1.2	1
EOG090F0BBC	scaffold_14	1351965	1357529	390	5565	4402	50.9	50-55%	36.46	32.7	1.1	1
EOG090F0BK6	scaffold_14	5842616	5846521	384	3906	3905	49.9	45-50%	36.59	35.4	1	1
EOG090F0BX7	scaffold_14	13716029	13718077	402	2049	2048	40.5	40-45%	42.85	37.1	1.2	1
EOG090F04BY	scaffold_140	365913	416194	1455	50282	46519	38.8	35-40%	43.45	37.8	1.1	1
EOG090F08KC	scaffold_140	1191231	1201860	828	10630	9879	37.8	35-40%	42.56	37.8	1.1	1
EOG090F0A2D	scaffold_140	959626	960228	603	603	603	46.6	45-50%	37.86	35.4	1.1	1
EOG090F009K	scaffold_141	1621736	1676647	5472	54912	52845	40.8	40-45%	42.41	37.1	1.1	1
EOG090F00JE	scaffold_141	1832764	1868565	3741	35802	34684	42.2	40-45%	41.29	37.1	1.1	1
EOG090F00ZA	scaffold_141	877037	969074	3423	92038	88299	41.5	40-45%	41.81	37.1	1.1	1
EOG090F00ZT	scaffold_141	1593387	1608466	3693	15080	14175	45.1	45-50%	42.36	35.4	1.2	1
EOG090F01JL	scaffold_141	765600	781594	2640	15995	15923	45.7	45-50%	40.08	35.4	1.1	1
EOG090F02UE	scaffold_141	1454070	1503440	2733	49371	46677	37.2	35-40%	43.17	37.8	1.1	1
EOG090F03JX	scaffold_141	840173	849396	1899	9224	8492	47.1	45-50%	42.21	35.4	1.2	1
EOG090F03KR	scaffold_141	1541770	1563246	1845	21477	20882	43.9	40-45%	42.29	37.1	1.1	1
EOG090F03M0	scaffold_141	548299	557543	1491	9245	8763	40.3	40-45%	41.12	37.1	1.1	1
EOG090F0558	scaffold_141	525173	547594	1377	22422	21932	44.1	40-45%	40.08	37.1	1.1	1
EOG090F06T4	scaffold_141	1534205	1538140	1113	3936	3832	46.6	45-50%	37.35	35.4	1.1	1
EOG090F07OV	scaffold_141	124144	134034	1047	9891	9830	50.2	50-55%	41.61	32.7	1.3	1
EOG090F083B	scaffold_141	1615654	1617347	1167	1694	1692	52.5	50-55%	39.38	32.7	1.2	1
EOG090F08Q1	scaffold_141	750910	751470	561	561	560	56.4	55-60%	44.76	30.1	1.5	2
EOG090F09LD	scaffold_141	2012548	2022685	630	10138	9311	45.8	45-50%	35.38	35.4	1	1
EOG090F09V9	scaffold_141	1687086	1694402	1113	7317	6716	37.7	35-40%	43.65	37.8	1.2	1
EOG090F09WV	scaffold_141	1389131	1394029	747	4899	4899	44.2	40-45%	41.87	37.1	1.1	1
EOG090F09ZI	scaffold_141	1405341	1409161	546	3821	3688	36.8	35-40%	41.03	37.8	1.1	1
EOG090F0BM8	scaffold_141	755130	758608	585	3479	3010	54.1	50-55%	34.27	32.7	1	1
EOG090F0852	scaffold_143	275643	281699	855	6057	6017	42.6	40-45%	41.72	37.1	1.1	1
EOG090F088W	scaffold_143	1271488	1285137	861	13650	13010	44.3	40-45%	40.66	37.1	1.1	1
EOG090F03A3	scaffold_144	1170384	1177295	1827	6912	6854	38.2	35-40%	42.83	37.8	1.1	1
EOG090F04RK	scaffold_144	550814	588809	2283	37996	36670	36.9	35-40%	42.51	37.8	1.1	1
EOG090F05L3	scaffold_144	929670	943257	1170	13588	13497	34.8	30-35%	43.39	37.8	1.1	1
EOG090F095L	scaffold_144	1436719	1452815	696	16097	15088	38.1	35-40%	40.53	37.8	1.1	1
EOG090F09C3	scaffold_144	1018577	1039939	804	21363	20832	36.1	35-40%	43.38	37.8	1.1	1
EOG090F02D0	scaffold_145	1215719	1250036	2262	34318	32529	39.9	35-40%	40.08	37.8	1.1	1
EOG090F05GC	scaffold_145	1948454	1972592	1419	24139	21323	48.6	45-50%	39.75	35.4	1.1	1
EOG090F0671	scaffold_145	112875	122023	1425	9149	9124	44	40-45%	42.33	37.1	1.1	1
EOG090F08UC	scaffold_145	1193032	1208949	705	15918	14752	41.9	40-45%	40.04	37.1	1.1	1
EOG090F091W	scaffold_145	95864	106867	501	11004	10185	36.5	35-40%	45.31	37.8	1.2	1
EOG090F0992	scaffold_145	829108	872334	1416	43227	38654	41	40-45%	42.95	37.1	1.2	1
EOG090F0124	scaffold_146	967841	970951	3111	3111	3111	44.6	40-45%	40.84	37.1	1.1	1
EOG090F03NH	scaffold_146	930663	952785	1626	22123	18608	40.1	40-45%	39.34	37.1	1.1	1
EOG090F03ZS	scaffold_146	978399	992751	1599	14353	13514	42	40-45%	42.62	37.1	1.1	1
EOG090F05DD	scaffold_146	174193	231230	1512	57038	49657	36.8	35-40%	41.84	37.8	1.1	1
EOG090F06AQ	scaffold_146	305252	349097	1797	43846	42017	38.4	35-40%	44.76	37.8	1.2	1
EOG090F07CE	scaffold_146	85122	97670	897	12549	11522	42.3	40-45%	43.47	37.1	1.2	1
EOG090F07MZ	scaffold_146	887725	920212	1110	32488	31787	46.8	45-50%	39.91	35.4	1.1	1
EOG090F09BO	scaffold_146	153521	173741	705	20221	19366	37.1	35-40%	43.46	37.8	1.1	1
EOG090F0B89	scaffold_146	839453	846018	471	6566	6212	47.6	45-50%	39.78	35.4	1.1	1
EOG090F00QK	scaffold_147	1593386	1652804	4203	59419	54917	39.9	35-40%	42.6	37.8	1.1	1
EOG090F00YR	scaffold_147	1102338	1105166	2829	2829	2828	40.6	40-45%	45.72	37.1	1.2	1
EOG090F01MW	scaffold_147	1735832	1751990	3135	16159	16030	39.8	35-40%	41.34	37.8	1.1	1
EOG090F01VM	scaffold_147	1759929	1775459	2589	15531	15205	39.2	35-40%	41.94	37.8	1.1	1
EOG090F03L7	scaffold_147	1826819	1833026	1857	6208	6124	42.6	40-45%	40.39	37.1	1.1	1
EOG090F03NC	scaffold_147	1788956	1806956	1686	18001	13143	39.8	35-40%	42.26	37.8	1.1	1
EOG090F04MO	scaffold_147	1182165	1200483	2310	18319	16017	38.2	35-40%	43.43	37.8	1.1	1
EOG090F04SO	scaffold_147	356802	366508	1566	9707	8361	42.1	40-45%	40.72	37.1	1.1	1
EOG090F05DA	scaffold_147	308762	323250	1245	14489	13981	42.8	40-45%	41.24	37.1	1.1	1
EOG090F06F5	scaffold_147	868532	877961	1053	9430	8272	40.9	40-45%	41.25	37.1	1.1	1
EOG090F06HL	scaffold_147	1707324	1710765	1059	3442	3429	39	35-40%	40.87	37.8	1.1	1
EOG090F06JJ	scaffold_147	478683	501353	1059	22671	21744	42.5	40-45%	41.49	37.1	1.1	1
EOG090F07WQ	scaffold_147	1247498	1255001	828	7504	7322	42.1	40-45%	42.8	37.1	1.2	1
EOG090F07ZO	scaffold_147	1701809	1717785	1185	15977	15177	43.3	40-45%	39.12	37.1	1.1	1
EOG090F080P	scaffold_147	1165798	1176914	849	11117	10964	42.1	40-45%	44.47	37.1	1.2	1
EOG090F08GO	scaffold_147	879310	900181	909	20872	20602	39.4	35-40%	42.5	37.8	1.1	1
EOG090F09T1	scaffold_147	344561	353108	822	8548	8445	37.2	35-40%	41.79	37.8	1.1	1
EOG090F0AFJ	scaffold_147	128138	155217	600	27080	25900	41.5	40-45%	41.81	37.1	1.1	1
EOG090F0AOS	scaffold_147	1211448	1220988	660	9541	9406	40.9	40-45%	43.12	37.1	1.2	1
EOG090F0AWP	scaffold_147	1712299	1713547	564	1249	1249	36.6	35-40%	45.03	37.8	1.2	1
EOG090F0AZK	scaffold_147	335055	340729	447	5675	5596	43.2	40-45%	41.72	37.1	1.1	1
EOG090F0BHS	scaffold_147	1719737	1727235	537	7499	7423	39.7	35-40%	41.99	37.8	1.1	1
EOG090F01LL	scaffold_148	896606	934771	2151	38166	36043	35.9	35-40%	42.2	37.8	1.1	1
EOG090F0451	scaffold_148	457842	482251	1566	24410	20951	38	35-40%	41.18	37.8	1.1	1
EOG090F01GR	scaffold_149	1779675	1802450	3126	22776	20418	47.2	45-50%	39.94	35.4	1.1	1
EOG090F06OH	scaffold_149	1734916	1736052	1137	1137	1137	42.3	40-45%	43.84	37.1	1.2	1
EOG090F06SN	scaffold_149	1475418	1480889	1167	5472	5190	49.7	45-50%	40.62	35.4	1.1	1
EOG090F0744	scaffold_149	1558907	1559974	1068	1068	1068	45.1	45-50%	40.68	35.4	1.1	1
EOG090F090H	scaffold_149	1578123	1590637	690	12515	10707	42.3	40-45%	42.26	37.1	1.1	1
EOG090F0ABB	scaffold_149	41808	57108	723	15301	14764	47	45-50%	37.62	35.4	1.1	1
EOG090F00D5	scaffold_15	361161	381456	6000	20296	20002	41.8	40-45%	42.86	37.1	1.2	1
EOG090F00ER	scaffold_15	11348739	11446481	5205	97743	90317	35.6	35-40%	43.74	37.8	1.2	1
EOG090F00JQ	scaffold_15	601251	653615	4731	52365	49173	41.1	40-45%	42.11	37.1	1.1	1
EOG090F00Q6	scaffold_15	3761512	3817851	5061	56340	54119	43.5	40-45%	42.02	37.1	1.1	1
EOG090F012C	scaffold_15	1079512	1095276	3417	15765	15478	37.8	35-40%	42.01	37.8	1.1	1
EOG090F01QM	scaffold_15	4274920	4305267	2406	30348	29749	40.5	40-45%	44.03	37.1	1.2	1
EOG090F01XW	scaffold_15	6644018	6712616	2253	68599	63100	36.5	35-40%	43.58	37.8	1.2	1
EOG090F02CF	scaffold_15	2960142	2963296	2283	3155	3150	39.8	35-40%	44.6	37.8	1.2	1
EOG090F02J3	scaffold_15	9922444	9951375	2052	28932	28011	43.8	40-45%	41.58	37.1	1.1	1
EOG090F02M5	scaffold_15	9975545	10013486	2217	37942	34822	37.7	35-40%	41.99	37.8	1.1	1
EOG090F02N4	scaffold_15	8368557	8381620	2460	13064	12993	44.9	40-45%	39.86	37.1	1.1	1
EOG090F02PO	scaffold_15	9559197	9610715	1935	51519	50180	37	35-40%	43.66	37.8	1.2	1
EOG090F034Q	scaffold_15	1181930	1190482	1902	8553	8459	48.4	45-50%	41.39	35.4	1.2	1
EOG090F03AP	scaffold_15	10422607	10444591	1830	21985	20434	38	35-40%	43.06	37.8	1.1	1
EOG090F03D1	scaffold_15	10393326	10408860	1770	15535	15013	42.5	40-45%	43.19	37.1	1.2	1
EOG090F03HG	scaffold_15	14759096	14760898	1803	1803	1802	47.7	45-50%	43.75	35.4	1.2	1
EOG090F03MF	scaffold_15	4188581	4199798	1665	11218	11217	45.7	45-50%	41.73	35.4	1.2	1
EOG090F03YP	scaffold_15	15067493	15126186	1284	58694	55721	37.4	35-40%	44.85	37.8	1.2	1
EOG090F040Y	scaffold_15	9737781	9772122	2238	34342	32728	44.5	40-45%	42.03	37.1	1.1	1
EOG090F042P	scaffold_15	324248	335913	1626	11666	10303	47.1	45-50%	38.64	35.4	1.1	1
EOG090F042S	scaffold_15	8104736	8147943	1701	43208	41707	39	35-40%	44.58	37.8	1.2	1
EOG090F04I7	scaffold_15	12742728	12771110	1494	28383	26979	40.3	40-45%	41.24	37.1	1.1	1
EOG090F04OO	scaffold_15	10097309	10141536	1284	44228	36590	43.2	40-45%	41.76	37.1	1.1	1
EOG090F04SB	scaffold_15	12715060	12741928	1596	26869	24678	37.6	35-40%	41.13	37.8	1.1	1
EOG090F04ZH	scaffold_15	275330	296844	1446	21515	21331	39.6	35-40%	42.19	37.8	1.1	1
EOG090F0526	scaffold_15	300057	322171	1407	22115	21391	39.1	35-40%	41.95	37.8	1.1	1
EOG090F05BE	scaffold_15	7733734	7760343	1365	26610	23238	43.4	40-45%	41.08	37.1	1.1	1
EOG090F05FF	scaffold_15	9968073	9974691	1395	6619	6607	46.8	45-50%	40.98	35.4	1.2	1
EOG090F05KV	scaffold_15	1148381	1170154	1443	21774	20171	38.8	35-40%	42.1	37.8	1.1	1
EOG090F05L5	scaffold_15	10804158	10809099	1500	4942	4739	41.3	40-45%	38.7	37.1	1	1
EOG090F05O2	scaffold_15	1063610	1072579	1125	8970	8847	38.6	35-40%	43.74	37.8	1.2	1
EOG090F061W	scaffold_15	4048371	4057158	1185	8788	8441	42.7	40-45%	41.78	37.1	1.1	1
EOG090F0624	scaffold_15	9192261	9211058	1479	18798	18485	37.1	35-40%	42	37.8	1.1	1
EOG090F06EN	scaffold_15	13018259	13050620	1158	32362	31327	42.1	40-45%	42.94	37.1	1.2	1
EOG090F06I6	scaffold_15	12206910	12257737	1155	50828	48983	48.4	45-50%	40.01	35.4	1.1	1
EOG090F07CF	scaffold_15	12007194	12012448	792	5255	5009	38.2	35-40%	41.4	37.8	1.1	1
EOG090F07K0	scaffold_15	12585930	12596539	1134	10610	10311	42.6	40-45%	40.13	37.1	1.1	1
EOG090F07MX	scaffold_15	12688920	12704622	924	15703	11791	37.9	35-40%	41.55	37.8	1.1	1
EOG090F07YL	scaffold_15	10891582	10915451	873	23870	21683	38.6	35-40%	40.19	37.8	1.1	1
EOG090F081X	scaffold_15	4108083	4109072	990	990	990	43.9	40-45%	50.95	37.1	1.4	1
EOG090F087V	scaffold_15	9812873	9832584	702	19712	19213	38.3	35-40%	41.58	37.8	1.1	1
EOG090F08E0	scaffold_15	7581320	7595649	642	14330	13833	39.3	35-40%	42	37.8	1.1	1
EOG090F08G4	scaffold_15	982454	1013637	1230	31184	28007	40.7	40-45%	42.29	37.1	1.1	1
EOG090F08GI	scaffold_15	809855	836003	1053	26149	21905	42	40-45%	42.96	37.1	1.2	1
EOG090F08UY	scaffold_15	2986023	3024810	960	38788	36969	40.1	40-45%	43.84	37.1	1.2	1
EOG090F08WQ	scaffold_15	1031223	1056923	684	25701	24185	37.6	35-40%	43.29	37.8	1.1	1
EOG090F09FO	scaffold_15	3997391	4006458	684	9068	8955	40.6	40-45%	40.61	37.1	1.1	1
EOG090F09QT	scaffold_15	13088299	13104117	645	15819	14805	39.4	35-40%	40.46	37.8	1.1	1
EOG090F0A45	scaffold_15	9881745	9902492	957	20748	20120	42.1	40-45%	39.78	37.1	1.1	1
EOG090F0A7S	scaffold_15	10758168	10769142	459	10975	10352	47.1	45-50%	41.42	35.4	1.2	1
EOG090F0ACT	scaffold_15	9190378	9190935	558	558	558	44.1	40-45%	42.31	37.1	1.1	1
EOG090F0AH0	scaffold_15	14966076	14980445	504	14370	14002	40.7	40-45%	43.78	37.1	1.2	1
EOG090F0AJD	scaffold_15	11649583	11661655	573	12073	11117	41.5	40-45%	40.74	37.1	1.1	1
EOG090F0B65	scaffold_15	10524714	10527383	651	2670	2668	40.5	40-45%	44.24	37.1	1.2	1
EOG090F0BJM	scaffold_15	12577571	12585084	441	7514	7371	38.7	35-40%	41.59	37.8	1.1	1
EOG090F0CNZ	scaffold_15	7205212	7215304	324	10093	9703	40.9	40-45%	42.02	37.1	1.1	1
EOG090F0CVM	scaffold_15	9721139	9728177	696	7039	6755	44.6	40-45%	41.64	37.1	1.1	1
EOG090F044G	scaffold_150	289180	297027	1626	7848	7811	38.9	35-40%	38.04	37.8	1	1
EOG090F072O	scaffold_150	553460	579576	1323	26117	25653	40.8	40-45%	42.88	37.1	1.2	1
EOG090F08KK	scaffold_150	355707	377476	726	21770	21012	42	40-45%	41.82	37.1	1.1	1
EOG090F08YQ	scaffold_150	473250	481882	792	8633	7921	42.1	40-45%	41.66	37.1	1.1	1
EOG090F09TN	scaffold_150	462375	469441	648	7067	6696	42.8	40-45%	39.97	37.1	1.1	1
EOG090F09VT	scaffold_150	278788	287759	666	8972	7715	36.8	35-40%	43.51	37.8	1.2	1
EOG090F0CIB	scaffold_150	602633	617893	549	15261	12719	39.4	35-40%	43.36	37.8	1.1	1
EOG090F020G	scaffold_151	1410281	1417494	2628	7214	7165	37.3	35-40%	45.47	37.8	1.2	1
EOG090F05EI	scaffold_151	396793	433656	1743	36864	35520	46.4	45-50%	38.5	35.4	1.1	1
EOG090F06N9	scaffold_151	1743187	1750680	1080	7494	7284	43.5	40-45%	39.6	37.1	1.1	1
EOG090F09HS	scaffold_151	305646	318322	618	12677	12293	45.1	45-50%	40.19	35.4	1.1	1
EOG090F09UP	scaffold_151	1750887	1755852	735	4966	4948	43.5	40-45%	39.44	37.1	1.1	1
EOG090F0AHV	scaffold_151	1820031	1836076	486	16046	15912	42.1	40-45%	43.27	37.1	1.2	1
EOG090F0AYQ	scaffold_151	1716102	1737445	495	21344	21121	39.7	35-40%	43.71	37.8	1.2	1
EOG090F00U1	scaffold_152	1116934	1169605	4515	52672	49643	38.1	35-40%	43.29	37.8	1.1	1
EOG090F01OK	scaffold_152	1730695	1755242	2748	24548	24370	35.1	35-40%	44.16	37.8	1.2	1
EOG090F06MA	scaffold_152	1822894	1845269	972	22376	9814	40.4	40-45%	105.21	37.1	2.8	3
EOG090F06R1	scaffold_152	529154	535396	1059	6243	6082	37.2	35-40%	42.97	37.8	1.1	1
EOG090F06SZ	scaffold_152	1272222	1275351	1110	3130	3089	53.3	50-55%	35.57	32.7	1.1	1
EOG090F074W	scaffold_152	506857	514758	1032	7902	7020	37.1	35-40%	43.56	37.8	1.2	1
EOG090F075S	scaffold_152	1581369	1617132	930	35764	34437	37.9	35-40%	43.76	37.8	1.2	1
EOG090F07EG	scaffold_152	449716	484917	1074	35202	30826	37.7	35-40%	42.78	37.8	1.1	1
EOG090F07OS	scaffold_152	562536	586304	951	23769	20872	36.7	35-40%	41.79	37.8	1.1	1
EOG090F0BAH	scaffold_152	71522	73227	483	1706	1642	54	50-55%	33.56	32.7	1	1
EOG090F030A	scaffold_153	410069	452076	2199	42008	41507	60.2	60-65%	32.44	27.7	1.2	1
EOG090F04YI	scaffold_153	592306	610473	1503	18168	17053	54.9	50-55%	37.76	32.7	1.2	1
EOG090F057D	scaffold_153	1495438	1503650	1515	8213	8162	40.1	40-45%	42.56	37.1	1.1	1
EOG090F06OX	scaffold_153	1782981	1792356	972	9376	8601	45.2	45-50%	42.19	35.4	1.2	1
EOG090F076Z	scaffold_153	1509803	1512217	1026	2415	2410	41.6	40-45%	43.93	37.1	1.2	1
EOG090F07BK	scaffold_153	712377	715578	897	3202	3190	59.5	55-60%	37.38	30.1	1.2	1
EOG090F07SU	scaffold_153	1802192	1807405	879	5214	5174	39.4	35-40%	46.6	37.8	1.2	1
EOG090F07XM	scaffold_153	759602	769248	1596	9647	8997	40.4	40-45%	42.78	37.1	1.2	1
EOG090F0AFV	scaffold_153	579796	583452	609	3657	3611	62.1	60-65%	30.08	27.7	1.1	1
EOG090F0B0B	scaffold_153	357065	358851	567	1787	1657	59.8	55-60%	34.14	30.1	1.1	1
EOG090F0BKH	scaffold_153	1664375	1670464	537	6090	5776	43.4	40-45%	36.86	37.1	1	1
EOG090F0BXO	scaffold_153	566483	574493	945	8011	7954	60.4	60-65%	32.25	27.7	1.2	1
EOG090F018V	scaffold_154	825537	876616	3594	51080	50073	36	35-40%	43.96	37.8	1.2	1
EOG090F01E7	scaffold_154	48177	85777	2964	37601	36262	39.2	35-40%	41.9	37.8	1.1	1
EOG090F0385	scaffold_154	6718	48362	2037	41645	40147	39.7	35-40%	44.6	37.8	1.2	1
EOG090F03WA	scaffold_154	1102326	1129193	1818	26868	25180	46.9	45-50%	38.98	35.4	1.1	1
EOG090F04DH	scaffold_154	889636	941835	2145	52200	50949	41	40-45%	44.53	37.1	1.2	1
EOG090F05VF	scaffold_154	1340269	1353027	1416	12759	11495	41.6	40-45%	39.45	37.1	1.1	1
EOG090F08K2	scaffold_154	1209528	1213000	885	3473	3460	39.7	35-40%	42.21	37.8	1.1	1
EOG090F09GU	scaffold_154	1093627	1094923	780	1297	1172	54.1	50-55%	40.02	32.7	1.2	1
EOG090F0AMR	scaffold_154	1741796	1759384	612	17589	17054	50	50-55%	38.21	32.7	1.2	1
EOG090F0B7D	scaffold_154	1765531	1767248	471	1718	1715	53.8	50-55%	36.67	32.7	1.1	1
EOG090F0CYT	scaffold_154	1380234	1385804	405	5571	5508	52.8	50-55%	36.39	32.7	1.1	1
EOG090F01C8	scaffold_155	746413	759084	2895	12672	12563	52.1	50-55%	37.42	32.7	1.1	1
EOG090F077U	scaffold_155	1603011	1645064	1074	42054	39374	42.6	40-45%	40.1	37.1	1.1	1
EOG090F0AAF	scaffold_155	500427	507829	501	7403	7377	45.2	45-50%	40.36	35.4	1.1	1
EOG090F0BIQ	scaffold_155	1109229	1109711	483	483	483	53	50-55%	41.99	32.7	1.3	1
EOG090F01Z4	scaffold_156	423000	441058	2286	18059	17566	41.7	40-45%	42.52	37.1	1.1	1
EOG090F02KM	scaffold_156	306068	352447	2625	46380	43609	38.8	35-40%	43.22	37.8	1.1	1
EOG090F0A9V	scaffold_156	459937	483814	1134	23878	22570	39.1	35-40%	41	37.8	1.1	1
EOG090F02MB	scaffold_157	1280443	1303020	2313	22578	22217	40.4	40-45%	41.89	37.1	1.1	1
EOG090F034C	scaffold_157	1245699	1266027	2226	20329	18935	42.8	40-45%	42.81	37.1	1.2	1
EOG090F03CK	scaffold_157	1365915	1387561	2217	21647	21400	52.5	50-55%	35.96	32.7	1.1	1
EOG090F08NB	scaffold_157	1142755	1144443	741	1689	1653	45.9	45-50%	37.21	35.4	1.1	1
EOG090F08RG	scaffold_157	1148816	1165973	954	17158	15662	38.8	35-40%	40.19	37.8	1.1	1
EOG090F09P8	scaffold_157	434131	434804	456	674	643	69.1	65-70%	22.88	26.7	0.9	1
EOG090F02Y2	scaffold_158	1125294	1144485	2001	19192	17593	43.7	40-45%	43.23	37.1	1.2	1
EOG090F03ZO	scaffold_158	1223846	1231144	1146	7299	7071	44	40-45%	42.4	37.1	1.1	1
EOG090F04EG	scaffold_158	464436	507046	1461	42611	41008	41.3	40-45%	40.56	37.1	1.1	1
EOG090F05NI	scaffold_158	1271828	1295690	1782	23863	23276	45.7	45-50%	40.65	35.4	1.1	1
EOG090F0658	scaffold_158	934677	954397	1269	19721	19583	46.2	45-50%	38.68	35.4	1.1	1
EOG090F06Z5	scaffold_158	1379867	1387190	1014	7324	7227	44.3	40-45%	40.67	37.1	1.1	1
EOG090F07A7	scaffold_158	737499	747526	1020	10028	8815	39.8	35-40%	43.72	37.8	1.2	1
EOG090F07OY	scaffold_158	671276	710451	1488	39176	35497	44.4	40-45%	38.78	37.1	1	1
EOG090F0943	scaffold_158	329575	333217	861	3643	3640	52.3	50-55%	41.82	32.7	1.3	1
EOG090F09BE	scaffold_158	644646	662070	936	17425	17369	45.3	45-50%	39.77	35.4	1.1	1
EOG090F09JY	scaffold_158	1398975	1406896	660	7922	7771	42	40-45%	38.04	37.1	1	1
EOG090F0ANP	scaffold_158	659056	659586	531	531	531	51.2	50-55%	40.08	32.7	1.2	1
EOG090F0ARV	scaffold_158	571414	586841	600	15428	15151	48.1	45-50%	38.44	35.4	1.1	1
EOG090F0AXV	scaffold_158	796609	801244	537	4636	4587	42.6	40-45%	40.73	37.1	1.1	1
EOG090F0BOQ	scaffold_158	1298535	1303258	375	4724	4709	43.2	40-45%	41.38	37.1	1.1	1
EOG090F0CFM	scaffold_158	1420485	1420883	399	399	398	60.6	60-65%	35.9	27.7	1.3	1
EOG090F056Z	scaffold_159	1441940	1457797	1164	15858	15660	38.3	35-40%	42.26	37.8	1.1	1
EOG090F05QJ	scaffold_159	1361740	1367552	1116	5813	5713	40.1	40-45%	44.46	37.1	1.2	1
EOG090F071A	scaffold_159	1528388	1547892	843	19505	19130	37.9	35-40%	41.97	37.8	1.1	1
EOG090F07IJ	scaffold_159	1422420	1435820	1101	13401	12928	39.8	35-40%	43.18	37.8	1.1	1
EOG090F0CI7	scaffold_159	1506756	1508406	231	1651	1650	37.9	35-40%	40.84	37.8	1.1	1
EOG090F00UH	scaffold_16	9028614	9070893	3693	42280	41570	35.6	35-40%	43.08	37.8	1.1	1
EOG090F011G	scaffold_16	3397516	3424436	3696	26921	26771	36.9	35-40%	41.35	37.8	1.1	1
EOG090F011Q	scaffold_16	1191490	1225012	3651	33523	32642	35.5	35-40%	43.7	37.8	1.2	1
EOG090F01DA	scaffold_16	8609218	8630293	3000	21076	20888	38.8	35-40%	43.79	37.8	1.2	1
EOG090F01IR	scaffold_16	11481150	11564958	2565	83809	77134	40.3	40-45%	43.62	37.1	1.2	1
EOG090F01NR	scaffold_16	5759164	5791643	2298	32480	31681	38.9	35-40%	42.84	37.8	1.1	1
EOG090F01P7	scaffold_16	5336036	5362187	2820	26152	25526	37.5	35-40%	43.5	37.8	1.2	1
EOG090F01S6	scaffold_16	11417623	11443026	2250	25404	25084	37.6	35-40%	42.08	37.8	1.1	1
EOG090F0207	scaffold_16	5415616	5435493	2394	19878	19524	46.7	45-50%	41.32	35.4	1.2	1
EOG090F02C9	scaffold_16	1408423	1463129	2553	54707	52644	38.4	35-40%	43.3	37.8	1.1	1
EOG090F02NF	scaffold_16	4257910	4269437	1845	11528	11474	41	40-45%	43.44	37.1	1.2	1
EOG090F02PC	scaffold_16	6801157	6842621	2001	41465	39411	39.1	35-40%	43.42	37.8	1.1	1
EOG090F02VI	scaffold_16	8591503	8608913	1980	17411	17084	38.1	35-40%	42.96	37.8	1.1	1
EOG090F02Z1	scaffold_16	3000530	3032414	1869	31885	30091	45.4	45-50%	41.04	35.4	1.2	1
EOG090F038H	scaffold_16	10524054	10542539	1479	18486	17767	41.4	40-45%	43.32	37.1	1.2	1
EOG090F03AU	scaffold_16	593097	604128	2364	11032	10174	40.3	40-45%	42.24	37.1	1.1	1
EOG090F03JB	scaffold_16	483307	528286	1734	44980	43771	43.7	40-45%	42.22	37.1	1.1	1
EOG090F03NL	scaffold_16	761008	844278	1734	83271	77308	45	45-50%	41.78	35.4	1.2	1
EOG090F044J	scaffold_16	9511222	9550043	1497	38822	36904	37.3	35-40%	43.52	37.8	1.2	1
EOG090F04CI	scaffold_16	7534058	7577498	1530	43441	42118	36.2	35-40%	45.21	37.8	1.2	1
EOG090F04PB	scaffold_16	7125229	7154403	1560	29175	27079	41.8	40-45%	42.93	37.1	1.2	1
EOG090F04PN	scaffold_16	48412	54632	1530	6221	6216	53.1	50-55%	39.97	32.7	1.2	1
EOG090F04R6	scaffold_16	3633555	3671012	1749	37458	35450	38.2	35-40%	41.98	37.8	1.1	1
EOG090F04W0	scaffold_16	76277	169510	1461	93234	86684	45	45-50%	41.38	35.4	1.2	1
EOG090F053F	scaffold_16	6924212	6981783	1830	57572	55829	40.2	40-45%	42.74	37.1	1.2	1
EOG090F053I	scaffold_16	10724734	10740340	1497	15607	15130	41.5	40-45%	38.95	37.1	1	1
EOG090F0565	scaffold_16	14246906	14275206	1362	28301	27274	38.6	35-40%	42.43	37.8	1.1	1
EOG090F058G	scaffold_16	3689549	3690883	1335	1335	1254	56.9	55-60%	37.52	30.1	1.2	1
EOG090F059M	scaffold_16	10008946	10015289	1260	6344	6325	40.3	40-45%	43.71	37.1	1.2	1
EOG090F05IH	scaffold_16	10018314	10034552	1299	16239	16062	38.6	35-40%	41.75	37.8	1.1	1
EOG090F05PX	scaffold_16	3566195	3591232	1374	25038	23369	42.5	40-45%	42.02	37.1	1.1	1
EOG090F05YV	scaffold_16	8459413	8483977	1122	24565	23865	36.9	35-40%	41.95	37.8	1.1	1
EOG090F05ZB	scaffold_16	9974185	9978674	1089	4490	4452	38.5	35-40%	43.43	37.8	1.1	1
EOG090F069S	scaffold_16	7086506	7091989	1176	5484	5446	41.8	40-45%	42.31	37.1	1.1	1
EOG090F06BU	scaffold_16	9783289	9806658	1230	23370	22144	35.8	35-40%	42.8	37.8	1.1	1
EOG090F06F3	scaffold_16	9816170	9849976	1431	33807	32839	42.9	40-45%	40.76	37.1	1.1	1
EOG090F06RQ	scaffold_16	8503739	8521059	1749	17321	16954	43.6	40-45%	41.91	37.1	1.1	1
EOG090F06SY	scaffold_16	10085211	10095823	984	10613	10318	35.6	35-40%	41.04	37.8	1.1	1
EOG090F06X6	scaffold_16	1135661	1161464	1092	25804	25144	40	40-45%	43.39	37.1	1.2	1
EOG090F06XZ	scaffold_16	8192655	8200055	1143	7401	7188	39.2	35-40%	40.29	37.8	1.1	1
EOG090F076R	scaffold_16	4208969	4218370	990	9402	9401	44.1	40-45%	43.83	37.1	1.2	1
EOG090F07BZ	scaffold_16	336766	345331	1296	8566	8238	60.4	60-65%	33.58	27.7	1.2	1
EOG090F07FB	scaffold_16	15055907	15068849	1113	12943	12557	42.6	40-45%	43.72	37.1	1.2	1
EOG090F07VQ	scaffold_16	8207447	8220094	936	12648	12185	41.1	40-45%	42.82	37.1	1.2	1
EOG090F0800	scaffold_16	9999365	10003455	1032	4091	3799	46.1	45-50%	39.49	35.4	1.1	1
EOG090F084C	scaffold_16	9551525	9561085	1119	9561	9336	36.9	35-40%	40.09	37.8	1.1	1
EOG090F085F	scaffold_16	10350611	10364740	1014	14130	13873	42.3	40-45%	41.73	37.1	1.1	1
EOG090F08GJ	scaffold_16	10757490	10790306	795	32817	31968	43.5	40-45%	41.34	37.1	1.1	1
EOG090F08GN	scaffold_16	6771897	6783914	1074	12018	11624	40.9	40-45%	43.78	37.1	1.2	1
EOG090F08JV	scaffold_16	3373199	3382446	1158	9248	9003	53.5	50-55%	35.51	32.7	1.1	1
EOG090F08VT	scaffold_16	11406249	11417156	915	10908	10763	38.2	35-40%	42.61	37.8	1.1	1
EOG090F094C	scaffold_16	6674101	6695503	627	21403	18012	34.4	30-35%	45.12	37.8	1.2	1
EOG090F09AG	scaffold_16	10910093	10917067	732	6975	6402	42.9	40-45%	42.1	37.1	1.1	1
EOG090F09KH	scaffold_16	8221952	8227043	591	5092	4980	44.9	40-45%	41.45	37.1	1.1	1
EOG090F09OS	scaffold_16	1300378	1302468	675	2091	2047	37.8	35-40%	35.73	37.8	0.9	1
EOG090F0A0C	scaffold_16	3248434	3268575	774	20142	19020	41.2	40-45%	42.7	37.1	1.2	1
EOG090F0A0U	scaffold_16	7721002	7737021	729	16020	15774	35	35-40%	43.75	37.8	1.2	1
EOG090F0A5I	scaffold_16	3194317	3240421	687	46105	44351	45.7	45-50%	41.05	35.4	1.2	1
EOG090F0A8B	scaffold_16	8433504	8451687	546	18184	17574	43.1	40-45%	41.4	37.1	1.1	1
EOG090F0AJI	scaffold_16	12283190	12291906	585	8717	8670	40.4	40-45%	43.45	37.1	1.2	1
EOG090F01S8	scaffold_160	1107622	1116253	2484	8632	8525	45.2	45-50%	37.8	35.4	1.1	1
EOG090F03A6	scaffold_160	1119281	1132864	2145	13584	13327	51.1	50-55%	36.33	32.7	1.1	1
EOG090F03I1	scaffold_160	1596758	1609434	1776	12677	12356	41.6	40-45%	37.38	37.1	1	1
EOG090F04LX	scaffold_160	260298	271743	1404	11446	10107	35.6	35-40%	40	37.8	1.1	1
EOG090F06M5	scaffold_160	1089045	1106132	1140	17088	16898	57.7	55-60%	31.78	30.1	1.1	1
EOG090F08OZ	scaffold_160	234485	238599	1032	4115	4043	41.8	40-45%	41.69	37.1	1.1	1
EOG090F01H3	scaffold_161	1409048	1458403	2736	49356	48655	39.5	35-40%	43.23	37.8	1.1	1
EOG090F03RQ	scaffold_161	1261456	1276726	1764	15271	13279	42.2	40-45%	39.99	37.1	1.1	1
EOG090F05BM	scaffold_161	644722	664624	1215	19903	19213	37.3	35-40%	41.63	37.8	1.1	1
EOG090F09J1	scaffold_161	50394	51158	765	765	763	39.4	35-40%	40.62	37.8	1.1	1
EOG090F0B7C	scaffold_161	1294071	1298967	378	4897	3849	38.7	35-40%	41.58	37.8	1.1	1
EOG090F0BA5	scaffold_161	1466301	1475558	864	9258	8962	44.3	40-45%	41.56	37.1	1.1	1
EOG090F0BCC	scaffold_161	426146	428748	621	2603	2527	46.1	45-50%	36.53	35.4	1	1
EOG090F0C8L	scaffold_161	1300420	1302756	369	2337	2337	48.9	45-50%	37.82	35.4	1.1	1
EOG090F0CLA	scaffold_161	314684	330637	255	15954	14691	38.5	35-40%	42.18	37.8	1.1	1
EOG090F0091	scaffold_162	602819	644552	7038	41734	40346	37	35-40%	42.77	37.8	1.1	1
EOG090F01T6	scaffold_162	1214943	1243256	2670	28314	26967	37.9	35-40%	42.02	37.8	1.1	1
EOG090F01YB	scaffold_162	1050054	1069443	2418	19390	18843	36.7	35-40%	42.31	37.8	1.1	1
EOG090F02TD	scaffold_162	1021431	1030045	1926	8615	8538	40.9	40-45%	41.69	37.1	1.1	1
EOG090F02W5	scaffold_162	1070713	1090559	2301	19847	18954	38.7	35-40%	44.09	37.8	1.2	1
EOG090F03F5	scaffold_162	469604	475184	1812	5581	5546	41.5	40-45%	42.22	37.1	1.1	1
EOG090F06VO	scaffold_162	1095745	1101236	1011	5492	5444	39.7	35-40%	43	37.8	1.1	1
EOG090F08UF	scaffold_162	577489	580560	702	3072	3072	41.8	40-45%	37.18	37.1	1	1
EOG090F0ABK	scaffold_162	1462346	1476992	408	14647	14161	43.2	40-45%	42.14	37.1	1.1	1
EOG090F00UG	scaffold_163	1486036	1523554	3351	37519	36364	42.7	40-45%	41.37	37.1	1.1	1
EOG090F026D	scaffold_163	1287027	1325345	2613	38319	36727	45.3	45-50%	40.52	35.4	1.1	1
EOG090F03DR	scaffold_163	1433680	1465195	1323	31516	26745	41.8	40-45%	42.37	37.1	1.1	1
EOG090F03RO	scaffold_163	610193	645989	1626	35797	33772	47.1	45-50%	38.02	35.4	1.1	1
EOG090F04IW	scaffold_163	205412	222990	1806	17579	15750	40.9	40-45%	41.53	37.1	1.1	1
EOG090F04SU	scaffold_163	152534	174809	1548	22276	21652	39.4	35-40%	43.38	37.8	1.1	1
EOG090F05HP	scaffold_163	827225	847641	1536	20417	19766	38.1	35-40%	41.21	37.8	1.1	1
EOG090F094V	scaffold_163	734600	749973	1263	15374	15039	40.7	40-45%	37.4	37.1	1	1
EOG090F0CKH	scaffold_163	702414	703704	222	1291	1271	51.2	50-55%	27.73	32.7	0.8	1
EOG090F00RP	scaffold_164	1355755	1393004	4044	37250	34014	42.4	40-45%	41.77	37.1	1.1	1
EOG090F023V	scaffold_164	1316528	1349860	2457	33333	32091	40.9	40-45%	42.82	37.1	1.2	1
EOG090F03SM	scaffold_164	1441087	1451918	1803	10832	10047	40.3	40-45%	41.3	37.1	1.1	1
EOG090F04AU	scaffold_164	1452644	1479339	1509	26696	21597	39.1	35-40%	41.05	37.8	1.1	1
EOG090F04RI	scaffold_164	1409283	1416665	1368	7383	6466	52.4	50-55%	41.86	32.7	1.3	1
EOG090F05TQ	scaffold_164	1513742	1514923	1182	1182	1182	43.6	40-45%	38.69	37.1	1	1
EOG090F06AL	scaffold_164	1427127	1432946	1266	5820	5226	46.5	45-50%	42.3	35.4	1.2	1
EOG090F083Z	scaffold_164	1263224	1269781	1098	6558	6447	51.4	50-55%	40.58	32.7	1.2	1
EOG090F08J6	scaffold_164	388851	395389	969	6539	6444	44.9	40-45%	36.37	37.1	1	1
EOG090F0BKS	scaffold_164	1483592	1494512	351	10921	8929	40.7	40-45%	40.07	37.1	1.1	1
EOG090F0157	scaffold_165	1066156	1100901	6579	34746	29818	43.4	40-45%	42.98	37.1	1.2	1
EOG090F02LF	scaffold_165	1006712	1050129	2184	43418	42541	46.3	45-50%	41.21	35.4	1.2	1
EOG090F04SN	scaffold_165	158061	163559	1506	5499	5376	60.5	60-65%	35.23	27.7	1.3	1
EOG090F07RO	scaffold_165	773837	779052	1257	5216	5062	60.1	60-65%	35.17	27.7	1.3	1
EOG090F08M3	scaffold_165	1360045	1375428	840	15384	9826	44	40-45%	40.06	37.1	1.1	1
EOG090F09TS	scaffold_165	1130603	1141488	618	10886	9844	50.9	50-55%	39.24	32.7	1.2	1
EOG090F0ALL	scaffold_165	942161	951662	606	9502	9391	55.9	55-60%	37.22	30.1	1.2	1
EOG090F0BC4	scaffold_165	974529	983678	696	9150	9003	55.9	55-60%	36	30.1	1.2	1
EOG090F0BIP	scaffold_165	1444314	1456322	501	12009	10038	46	45-50%	35.86	35.4	1	1
EOG090F03Y9	scaffold_166	1224677	1244895	2604	20219	16154	37.7	35-40%	42.11	37.8	1.1	1
EOG090F08O5	scaffold_166	729024	743338	888	14315	12363	41.6	40-45%	40.13	37.1	1.1	1
EOG090F0AJE	scaffold_166	1024868	1033875	591	9008	8945	44.5	40-45%	43.25	37.1	1.2	1
EOG090F012I	scaffold_167	248943	296941	3216	47999	43978	40.9	40-45%	41.86	37.1	1.1	1
EOG090F01SF	scaffold_167	351636	408189	3318	56554	45984	37.2	35-40%	42.56	37.8	1.1	1
EOG090F03F8	scaffold_167	1008761	1032684	1869	23924	20628	46.4	45-50%	41.89	35.4	1.2	1
EOG090F03RR	scaffold_167	300829	341533	1629	40705	38504	42.1	40-45%	42.53	37.1	1.1	1
EOG090F05Q3	scaffold_167	1086185	1109706	1365	23522	22901	44.6	40-45%	40.39	37.1	1.1	1
EOG090F06XB	scaffold_167	1070311	1092648	1068	22338	21524	49.3	45-50%	40.37	35.4	1.1	1
EOG090F083C	scaffold_167	1284116	1290262	1980	6147	4675	43.1	40-45%	37.74	37.1	1	1
EOG090F08LW	scaffold_167	3494	6571	822	3078	2900	55.8	55-60%	37.44	30.1	1.2	1
EOG090F09MQ	scaffold_167	999921	1007784	948	7864	7034	47.7	45-50%	44.21	35.4	1.2	1
EOG090F09R6	scaffold_167	1301805	1302482	678	678	678	46.6	45-50%	46.79	35.4	1.3	1
EOG090F09W1	scaffold_167	1369506	1375791	690	6286	6164	51.4	50-55%	39.12	32.7	1.2	1
EOG090F0APZ	scaffold_167	53864	57533	456	3670	3022	44	40-45%	41.09	37.1	1.1	1
EOG090F0AUH	scaffold_167	955751	957881	489	2131	2131	53	50-55%	40.62	32.7	1.2	1
EOG090F0C6B	scaffold_167	1325299	1328468	312	3170	3169	47.7	45-50%	42.54	35.4	1.2	1
EOG090F03DN	scaffold_168	407552	417432	1977	9881	9241	54.1	50-55%	37.43	32.7	1.1	1
EOG090F06BL	scaffold_168	724484	750334	1323	25851	23906	48	45-50%	40.56	35.4	1.1	1
EOG090F0806	scaffold_168	93823	98986	1062	5164	5109	52.4	50-55%	37.82	32.7	1.2	1
EOG090F0847	scaffold_168	99986	103114	1002	3129	3120	50.9	50-55%	36.25	32.7	1.1	1
EOG090F09TH	scaffold_168	174116	174721	606	606	606	53.5	50-55%	30.4	32.7	0.9	1
EOG090F0B1L	scaffold_168	22610	27862	507	5253	5038	44.6	40-45%	41.39	37.1	1.1	1
EOG090F0B6A	scaffold_168	325233	334026	573	8794	8729	40.3	40-45%	41.49	37.1	1.1	1
EOG090F0BTM	scaffold_168	119117	121776	321	2660	2652	54.6	50-55%	34.9	32.7	1.1	1
EOG090F0CHP	scaffold_168	398058	405456	663	7399	7321	52.9	50-55%	38.22	32.7	1.2	1
EOG090F00X8	scaffold_169	1284029	1292843	3339	8815	8258	68.4	65-70%	27.17	26.7	1	1
EOG090F01PH	scaffold_169	571901	580954	2493	9054	8729	51	50-55%	35.04	32.7	1.1	1
EOG090F03TT	scaffold_169	522113	550513	1674	28401	28109	41.1	40-45%	40.72	37.1	1.1	1
EOG090F045T	scaffold_169	276134	285705	1770	9572	9492	45.9	45-50%	38.99	35.4	1.1	1
EOG090F07Z9	scaffold_169	1133074	1139929	939	6856	6797	48.2	45-50%	36.73	35.4	1	1
EOG090F0C5L	scaffold_169	902385	904033	519	1649	1646	41.6	40-45%	40.56	37.1	1.1	1
EOG090F00PL	scaffold_17	6960281	6975054	3987	14774	14567	46.3	45-50%	40.47	35.4	1.1	1
EOG090F00X6	scaffold_17	5172621	5194274	2037	21654	19772	39.5	35-40%	42.37	37.8	1.1	1
EOG090F00ZD	scaffold_17	13081814	13137579	3483	55766	50830	35.9	35-40%	42.92	37.8	1.1	1
EOG090F015W	scaffold_17	14015562	14088503	3282	72942	67114	35.2	35-40%	41.17	37.8	1.1	1
EOG090F01PM	scaffold_17	8059865	8129521	2760	69657	66606	40.2	40-45%	44.07	37.1	1.2	1
EOG090F01RH	scaffold_17	5821669	5839719	2517	18051	17715	37.7	35-40%	43.78	37.8	1.2	1
EOG090F01TT	scaffold_17	409612	453887	2823	44276	42300	40.1	40-45%	44.13	37.1	1.2	1
EOG090F020H	scaffold_17	7289814	7312635	2502	22822	21129	36.1	35-40%	43.19	37.8	1.1	1
EOG090F02L4	scaffold_17	5843380	5865444	2169	22065	21300	35.4	35-40%	42.1	37.8	1.1	1
EOG090F037P	scaffold_17	1754150	1797609	1920	43460	41441	37.2	35-40%	45.24	37.8	1.2	1
EOG090F03BP	scaffold_17	12569934	12630445	1845	60512	58802	37.7	35-40%	43.61	37.8	1.2	1
EOG090F0465	scaffold_17	6843136	6859652	1752	16517	14432	38.7	35-40%	42.43	37.8	1.1	1
EOG090F04B2	scaffold_17	1431724	1465221	1635	33498	30887	36.1	35-40%	42.3	37.8	1.1	1
EOG090F04CV	scaffold_17	6201551	6252838	1554	51288	48702	37.1	35-40%	43.51	37.8	1.2	1
EOG090F04HN	scaffold_17	11973551	12011343	1488	37793	33641	36.2	35-40%	43.13	37.8	1.1	1
EOG090F04LK	scaffold_17	5565398	5619086	1983	53689	49121	39.9	35-40%	42.3	37.8	1.1	1
EOG090F04VZ	scaffold_17	2077797	2098340	1410	20544	19911	34.9	30-35%	45.4	37.8	1.2	1
EOG090F0538	scaffold_17	3777240	3811944	1446	34705	32563	39.2	35-40%	42.68	37.8	1.1	1
EOG090F05E4	scaffold_17	6407890	6458422	1761	50533	46229	36.7	35-40%	44.08	37.8	1.2	1
EOG090F05EB	scaffold_17	14195310	14266048	1467	70739	66542	36.6	35-40%	43.03	37.8	1.1	1
EOG090F05Q4	scaffold_17	5783613	5811567	1470	27955	25379	38	35-40%	42.3	37.8	1.1	1
EOG090F063F	scaffold_17	1329856	1360987	2016	31132	26654	39.2	35-40%	39.68	37.8	1	1
EOG090F06DQ	scaffold_17	1244287	1273401	1203	29115	27719	37.8	35-40%	43.26	37.8	1.1	1
EOG090F06HR	scaffold_17	923858	933915	1050	10058	9816	39.9	35-40%	39.28	37.8	1	1
EOG090F06JL	scaffold_17	3761556	3765161	1008	3606	3456	40.3	40-45%	43.35	37.1	1.2	1
EOG090F06LY	scaffold_17	5653184	5675751	1095	22568	21093	38.9	35-40%	43.2	37.8	1.1	1
EOG090F08BL	scaffold_17	9061419	9093695	1050	32277	30192	37.6	35-40%	41.6	37.8	1.1	1
EOG090F08T1	scaffold_17	1409950	1422496	663	12547	12054	39.4	35-40%	41.71	37.8	1.1	1
EOG090F08UH	scaffold_17	357925	358776	852	852	852	40.1	40-45%	36.64	37.1	1	1
EOG090F08V2	scaffold_17	12020996	12031396	804	10401	10244	43.9	40-45%	38.47	37.1	1	1
EOG090F094K	scaffold_17	10404413	10423795	939	19383	17986	42.8	40-45%	40.69	37.1	1.1	1
EOG090F095B	scaffold_17	1026874	1071609	750	44736	42167	39.4	35-40%	42.34	37.8	1.1	1
EOG090F0A6I	scaffold_17	4899135	4921337	768	22203	19430	36.8	35-40%	44.58	37.8	1.2	1
EOG090F0BSD	scaffold_17	6395366	6395710	345	345	345	39.7	35-40%	43.89	37.8	1.2	1
EOG090F04NP	scaffold_170	325101	369650	1416	44550	43344	41.3	40-45%	42.46	37.1	1.1	1
EOG090F06UQ	scaffold_170	388521	447100	1062	58580	54163	40	40-45%	42.29	37.1	1.1	1
EOG090F07NC	scaffold_170	389833	402043	1233	12211	11582	35.3	35-40%	42.38	37.8	1.1	1
EOG090F05S2	scaffold_171	1269576	1273647	1608	4072	4003	52.5	50-55%	34.85	32.7	1.1	1
EOG090F06GA	scaffold_171	1304300	1313997	1293	9698	9343	46.1	45-50%	38.54	35.4	1.1	1
EOG090F07FI	scaffold_171	731080	734539	942	3460	3452	50.2	50-55%	37.08	32.7	1.1	1
EOG090F042K	scaffold_172	1276122	1326129	1818	50008	49196	39.7	35-40%	43.28	37.8	1.1	1
EOG090F048Q	scaffold_172	11868	23646	1635	11779	11628	42.9	40-45%	41.55	37.1	1.1	1
EOG090F0990	scaffold_172	456065	464190	699	8126	7672	44.2	40-45%	42.4	37.1	1.1	1
EOG090F05D6	scaffold_173	599654	618539	1308	18886	17882	43.4	40-45%	39.24	37.1	1.1	1
EOG090F0653	scaffold_173	1134238	1162831	1569	28594	26345	38.7	35-40%	42.87	37.8	1.1	1
EOG090F06D0	scaffold_173	952576	965510	1074	12935	12828	49.2	45-50%	41.55	35.4	1.2	1
EOG090F00Y3	scaffold_174	177845	190458	4803	12614	7077	36.7	35-40%	47.5	37.8	1.3	1
EOG090F04PA	scaffold_174	161159	171510	1473	10352	10087	37.7	35-40%	41.92	37.8	1.1	1
EOG090F073U	scaffold_174	145061	156256	1071	11196	10053	38.9	35-40%	41.03	37.8	1.1	1
EOG090F00AK	scaffold_175	636606	685980	6264	49375	44820	36	35-40%	42.46	37.8	1.1	1
EOG090F02LD	scaffold_175	493093	517441	2475	24349	23744	37.5	35-40%	43.19	37.8	1.1	1
EOG090F011P	scaffold_178	48590	112005	3570	63416	59282	42.3	40-45%	42.87	37.1	1.2	1
EOG090F0276	scaffold_178	850409	862141	2217	11733	11680	42.6	40-45%	40.54	37.1	1.1	1
EOG090F03CM	scaffold_178	18746	38172	2163	19427	18632	39.2	35-40%	42.8	37.8	1.1	1
EOG090F03PQ	scaffold_178	563999	581373	1554	17375	16004	43.7	40-45%	41.95	37.1	1.1	1
EOG090F05F2	scaffold_178	759453	771157	1422	11705	11446	42.9	40-45%	45.66	37.1	1.2	1
EOG090F05PQ	scaffold_178	1168155	1172999	1275	4845	4750	67.3	65-70%	29.07	26.7	1.1	1
EOG090F09X3	scaffold_178	886883	892045	693	5163	5063	42.4	40-45%	40.18	37.1	1.1	1
EOG090F0A53	scaffold_178	880046	883842	639	3797	3787	44.5	40-45%	40.51	37.1	1.1	1
EOG090F0A7U	scaffold_178	599811	608561	612	8751	8284	42.7	40-45%	40.71	37.1	1.1	1
EOG090F0AAA	scaffold_178	694000	699585	543	5586	5426	52.5	50-55%	41.57	32.7	1.3	1
EOG090F0APL	scaffold_178	620469	624997	900	4529	4529	42.9	40-45%	38.81	37.1	1	1
EOG090F0AS2	scaffold_178	867056	876284	522	9229	8569	47.6	45-50%	40.84	35.4	1.2	1
EOG090F0C27	scaffold_178	612996	618638	315	5643	5635	42.8	40-45%	40.36	37.1	1.1	1
EOG090F02FN	scaffold_179	245084	266470	2907	21387	20135	39.9	35-40%	44.16	37.8	1.2	1
EOG090F00K0	scaffold_18	7062258	7126315	4803	64058	59681	35.4	35-40%	43.41	37.8	1.1	1
EOG090F00N2	scaffold_18	13983196	14015066	3564	31871	30866	40.7	40-45%	44.56	37.1	1.2	1
EOG090F00VY	scaffold_18	1412060	1424319	3666	12260	11714	40.2	40-45%	43.47	37.1	1.2	1
EOG090F010C	scaffold_18	7446259	7516812	3177	70554	65232	38.4	35-40%	43.73	37.8	1.2	1
EOG090F01O9	scaffold_18	11627298	11653223	2673	25926	24912	39.3	35-40%	41.54	37.8	1.1	1
EOG090F01UK	scaffold_18	12869713	12909209	2556	39497	38279	38.7	35-40%	42.81	37.8	1.1	1
EOG090F022B	scaffold_18	11040933	11063282	2403	22350	21281	43.4	40-45%	43.15	37.1	1.2	1
EOG090F02PN	scaffold_18	11091575	11123518	2286	31944	30932	39.1	35-40%	43.13	37.8	1.1	1
EOG090F034J	scaffold_18	1319223	1328741	2049	9519	9459	34.3	30-35%	41.73	37.8	1.1	1
EOG090F038M	scaffold_18	625326	665906	1821	40581	35377	36.3	35-40%	42.87	37.8	1.1	1
EOG090F03WZ	scaffold_18	4742227	4763894	1671	21668	20287	41.3	40-45%	41.79	37.1	1.1	1
EOG090F04EQ	scaffold_18	2227516	2247383	1473	19868	19797	38.6	35-40%	41.64	37.8	1.1	1
EOG090F04ZO	scaffold_18	5662360	5664452	1506	2093	2022	41.9	40-45%	45.68	37.1	1.2	1
EOG090F05TL	scaffold_18	1013165	1060864	1230	47700	44173	40.9	40-45%	41.86	37.1	1.1	1
EOG090F06ER	scaffold_18	4020272	4057796	999	37525	34629	39.4	35-40%	44.08	37.8	1.2	1
EOG090F06L8	scaffold_18	5232343	5250203	1041	17861	16973	40.4	40-45%	38.85	37.1	1	1
EOG090F06LM	scaffold_18	2811869	2823048	1692	11180	11045	39.4	35-40%	42.93	37.8	1.1	1
EOG090F06VP	scaffold_18	13260914	13269954	972	9041	8943	43.7	40-45%	42.96	37.1	1.2	1
EOG090F06Y3	scaffold_18	5678055	5679104	1050	1050	1050	56	55-60%	42.07	30.1	1.4	1
EOG090F0789	scaffold_18	9667864	9714704	1176	46841	44168	39.4	35-40%	42.78	37.8	1.1	1
EOG090F07I1	scaffold_18	4887031	4888143	1113	1113	1113	52.4	50-55%	40.52	32.7	1.2	1
EOG090F07I7	scaffold_18	2865709	2882646	894	16938	15572	38.2	35-40%	42.66	37.8	1.1	1
EOG090F07O4	scaffold_18	14356003	14375112	966	19110	18307	36.4	35-40%	42.18	37.8	1.1	1
EOG090F07PR	scaffold_18	5916317	5931655	993	15339	13986	38.4	35-40%	42.23	37.8	1.1	1
EOG090F07WK	scaffold_18	4727261	4738167	894	10907	10790	39	35-40%	42.2	37.8	1.1	1
EOG090F07XL	scaffold_18	6831649	6851595	1146	19947	19035	39.8	35-40%	43.69	37.8	1.2	1
EOG090F085M	scaffold_18	1811152	1840913	840	29762	26540	35.4	35-40%	43	37.8	1.1	1
EOG090F08B3	scaffold_18	1784331	1800548	1005	16218	15805	37	35-40%	43.81	37.8	1.2	1
EOG090F08CJ	scaffold_18	1247650	1261890	1020	14241	12591	36.9	35-40%	41.8	37.8	1.1	1
EOG090F08I7	scaffold_18	6605103	6637991	957	32889	31304	36.7	35-40%	42.06	37.8	1.1	1
EOG090F08K6	scaffold_18	6573607	6582328	885	8722	8664	39.5	35-40%	42.46	37.8	1.1	1
EOG090F08RN	scaffold_18	1276326	1289773	819	13448	13373	33.6	30-35%	40.93	37.8	1.1	1
EOG090F097V	scaffold_18	5498710	5502420	804	3711	3460	45.7	45-50%	42.76	35.4	1.2	1
EOG090F099K	scaffold_18	2849375	2865079	834	15705	14320	38.6	35-40%	40.95	37.8	1.1	1
EOG090F09EK	scaffold_18	13604236	13645714	1257	41479	39964	37.6	35-40%	42.61	37.8	1.1	1
EOG090F09QM	scaffold_18	6626864	6648131	654	21268	20868	36.3	35-40%	43.13	37.8	1.1	1
EOG090F0AO2	scaffold_18	11429883	11457578	822	27696	26430	39.7	35-40%	42.25	37.8	1.1	1
EOG090F0BMZ	scaffold_18	5692921	5700310	549	7390	5600	43.5	40-45%	35.63	37.1	1	1
EOG090F0CMT	scaffold_18	1478175	1487099	468	8925	8176	45.8	45-50%	40.9	35.4	1.2	1
EOG090F080Y	scaffold_181	859208	864396	1167	5189	5006	56.9	55-60%	35.96	30.1	1.2	1
EOG090F08I5	scaffold_181	735270	736082	813	813	813	49.8	45-50%	29.96	35.4	0.8	1
EOG090F0BP8	scaffold_181	160409	165933	624	5525	5428	60.2	60-65%	31.81	27.7	1.1	1
EOG090F01ZV	scaffold_183	897466	910964	2460	13499	13267	57.6	55-60%	34.22	30.1	1.1	1
EOG090F03FQ	scaffold_183	730204	767492	2253	37289	35768	42.7	40-45%	41.9	37.1	1.1	1
EOG090F03JL	scaffold_183	986161	1001893	1896	15733	15627	41.7	40-45%	42.73	37.1	1.2	1
EOG090F040G	scaffold_183	1089941	1095135	1596	5195	5003	57.4	55-60%	33.75	30.1	1.1	1
EOG090F0AK3	scaffold_183	1010499	1013675	519	3177	3055	48.6	45-50%	44.53	35.4	1.3	1
EOG090F0C2R	scaffold_183	1079274	1088973	1056	9700	9245	49.2	45-50%	36.01	35.4	1	1
EOG090F0CWO	scaffold_183	1027786	1030628	258	2843	2750	44.2	40-45%	44.25	37.1	1.2	1
EOG090F04AQ	scaffold_184	865218	889284	1578	24067	23031	39.7	35-40%	41.03	37.8	1.1	1
EOG090F00DC	scaffold_185	628871	735505	6384	106635	100621	39.6	35-40%	43.94	37.8	1.2	1
EOG090F027G	scaffold_185	308819	335168	2583	26350	21497	42.5	40-45%	40.48	37.1	1.1	1
EOG090F0516	scaffold_185	362249	392337	1578	30089	27556	49.8	45-50%	39.56	35.4	1.1	1
EOG090F05ZJ	scaffold_185	848812	858641	1074	9830	9818	43.8	40-45%	41.8	37.1	1.1	1
EOG090F07QW	scaffold_185	558433	577553	681	19121	18380	37.9	35-40%	42.82	37.8	1.1	1
EOG090F08CO	scaffold_185	955239	966186	780	10948	9312	42.7	40-45%	40.27	37.1	1.1	1
EOG090F0A2U	scaffold_185	597793	605047	567	7255	6783	48.9	45-50%	41.35	35.4	1.2	1
EOG090F0AE9	scaffold_185	539423	550591	681	11169	11051	39.2	35-40%	43.33	37.8	1.1	1
EOG090F041U	scaffold_186	754508	766236	1542	11729	10713	41.3	40-45%	40.37	37.1	1.1	1
EOG090F06JG	scaffold_186	971415	982439	1446	11025	10926	45.5	45-50%	41.39	35.4	1.2	1
EOG090F09HF	scaffold_186	434159	434992	834	834	804	47.8	45-50%	47.49	35.4	1.3	1
EOG090F0CT2	scaffold_186	925699	930505	453	4807	4672	42.8	40-45%	40.01	37.1	1.1	1
EOG090F01EJ	scaffold_187	56457	65445	2646	8989	8895	47.5	45-50%	38.9	35.4	1.1	1
EOG090F04QW	scaffold_187	74988	86575	1335	11588	11146	41.6	40-45%	40.16	37.1	1.1	1
EOG090F0782	scaffold_187	41888	54646	1083	12759	12527	49.8	45-50%	36.22	35.4	1	1
EOG090F047K	scaffold_188	520560	535791	1677	15232	14554	41.8	40-45%	41.03	37.1	1.1	1
EOG090F035F	scaffold_189	56457	58600	1698	2144	2141	42.3	40-45%	41.94	37.1	1.1	1
EOG090F03R0	scaffold_189	110398	122155	1524	11758	11706	40.1	40-45%	42.2	37.1	1.1	1
EOG090F03V0	scaffold_189	72242	79452	2364	7211	7162	38	35-40%	45.18	37.8	1.2	1
EOG090F07Z1	scaffold_189	126131	136849	1050	10719	10468	39.5	35-40%	41.35	37.8	1.1	1
EOG090F0BHX	scaffold_189	85732	91538	747	5807	5135	39.8	35-40%	41.53	37.8	1.1	1
EOG090F00A9	scaffold_19	8474702	8496184	5988	21483	20980	42	40-45%	42.44	37.1	1.1	1
EOG090F00RJ	scaffold_19	1588071	1609911	4128	21841	20803	50	50-55%	40.02	32.7	1.2	1
EOG090F00TW	scaffold_19	2152063	2170316	3525	18254	16594	40.2	40-45%	40.31	37.1	1.1	1
EOG090F012P	scaffold_19	2695804	2740583	3570	44780	42098	39.8	35-40%	44.1	37.8	1.2	1
EOG090F013N	scaffold_19	2233800	2267455	3054	33656	31842	43	40-45%	43.12	37.1	1.2	1
EOG090F016M	scaffold_19	11739256	11771534	3132	32279	30497	39.6	35-40%	42.79	37.8	1.1	1
EOG090F01AN	scaffold_19	735048	765912	3444	30865	29742	40.4	40-45%	43.7	37.1	1.2	1
EOG090F01OI	scaffold_19	7734143	7783995	2655	49853	48302	39.8	35-40%	42.77	37.8	1.1	1
EOG090F01P4	scaffold_19	6757867	6786543	2682	28677	26651	41.1	40-45%	42.99	37.1	1.2	1
EOG090F01VB	scaffold_19	2119669	2131008	2685	11340	11112	44.3	40-45%	42.7	37.1	1.2	1
EOG090F021D	scaffold_19	587808	611212	1737	23405	22797	39.9	35-40%	42.35	37.8	1.1	1
EOG090F02C7	scaffold_19	8589947	8615950	2145	26004	25547	41.7	40-45%	43.35	37.1	1.2	1
EOG090F02I9	scaffold_19	2882911	2900001	1962	17091	15587	38.7	35-40%	43.23	37.8	1.1	1
EOG090F02IU	scaffold_19	11478845	11502756	2130	23912	23686	39.9	35-40%	43.62	37.8	1.2	1
EOG090F033Y	scaffold_19	11383437	11431327	1956	47891	45272	43.3	40-45%	47.44	37.1	1.3	1
EOG090F03VM	scaffold_19	11538043	11553039	1590	14997	14913	42.4	40-45%	43.52	37.1	1.2	1
EOG090F045S	scaffold_19	1303781	1346081	1518	42301	41238	39.9	35-40%	43.97	37.8	1.2	1
EOG090F046C	scaffold_19	9452214	9464603	1581	12390	11603	41.9	40-45%	43.98	37.1	1.2	1
EOG090F04I3	scaffold_19	11613144	11633347	2115	20204	19172	39.3	35-40%	41.64	37.8	1.1	1
EOG090F04XM	scaffold_19	7852679	7870916	1563	18238	17805	39.7	35-40%	43.09	37.8	1.1	1
EOG090F05M1	scaffold_19	6419167	6467940	1905	48774	46948	38	35-40%	43.49	37.8	1.2	1
EOG090F05M4	scaffold_19	11555339	11567390	1359	12052	12021	46.3	45-50%	39.96	35.4	1.1	1
EOG090F05MC	scaffold_19	6626038	6653198	1158	27161	26627	39.3	35-40%	41.78	37.8	1.1	1
EOG090F066Y	scaffold_19	4669209	4698158	1812	28950	28301	41.2	40-45%	43.44	37.1	1.2	1
EOG090F067I	scaffold_19	10299537	10311477	768	11941	11165	40.4	40-45%	40.22	37.1	1.1	1
EOG090F06D2	scaffold_19	6696402	6708806	1128	12405	11665	41.9	40-45%	40.79	37.1	1.1	1
EOG090F06DC	scaffold_19	9432653	9440002	1098	7350	7350	37.2	35-40%	43.12	37.8	1.1	1
EOG090F06DY	scaffold_19	7602732	7623488	1353	20757	20046	38.3	35-40%	43.01	37.8	1.1	1
EOG090F06TI	scaffold_19	777843	816629	1404	38787	37637	36.1	35-40%	43.34	37.8	1.1	1
EOG090F06UT	scaffold_19	11461166	11468012	1059	6847	5786	46.8	45-50%	43.61	35.4	1.2	1
EOG090F077R	scaffold_19	10351007	10363773	1005	12767	12225	38.4	35-40%	43.18	37.8	1.1	1
EOG090F07BA	scaffold_19	8622736	8641383	1770	18648	16284	37.2	35-40%	43.13	37.8	1.1	1
EOG090F07P7	scaffold_19	1708094	1728027	996	19934	19553	41.7	40-45%	41.02	37.1	1.1	1
EOG090F07RI	scaffold_19	1677080	1680954	906	3875	3874	52.3	50-55%	37.51	32.7	1.1	1
EOG090F0825	scaffold_19	6472201	6487213	1023	15013	14707	40.2	40-45%	42.82	37.1	1.2	1
EOG090F088I	scaffold_19	8961681	8980294	930	18614	17915	36	35-40%	43.72	37.8	1.2	1
EOG090F08DU	scaffold_19	9512823	9548311	1005	35489	34565	47.1	45-50%	40.16	35.4	1.1	1
EOG090F08II	scaffold_19	6879724	6905379	1143	25656	24898	39.1	35-40%	41.71	37.8	1.1	1
EOG090F08IO	scaffold_19	9468993	9484918	942	15926	15171	40.2	40-45%	41.09	37.1	1.1	1
EOG090F08KZ	scaffold_19	10506614	10545894	1149	39281	38046	43.6	40-45%	42.09	37.1	1.1	1
EOG090F08MM	scaffold_19	1567842	1571999	795	4158	4098	42.5	40-45%	38.26	37.1	1	1
EOG090F08NV	scaffold_19	9125590	9131340	483	5751	5720	40	40-45%	46.95	37.1	1.3	1
EOG090F08TT	scaffold_19	6843051	6866786	786	23736	22325	41.4	40-45%	42.61	37.1	1.1	1
EOG090F08ZY	scaffold_19	2095797	2117274	1068	21478	21171	42.4	40-45%	42.45	37.1	1.1	1
EOG090F092G	scaffold_19	6590104	6611008	987	20905	20046	37.3	35-40%	42.52	37.8	1.1	1
EOG090F09Q3	scaffold_19	4598219	4618200	600	19982	19755	42.2	40-45%	44.21	37.1	1.2	1
EOG090F0A0G	scaffold_19	8982243	8992748	666	10506	10138	39.5	35-40%	45.04	37.8	1.2	1
EOG090F0AZ6	scaffold_19	10316229	10320096	627	3868	3205	43.2	40-45%	40.37	37.1	1.1	1
EOG090F0BKO	scaffold_19	6870147	6874103	375	3957	3841	46.8	45-50%	41.23	35.4	1.2	1
EOG090F0BOO	scaffold_19	9748183	9751098	354	2916	2868	38.4	35-40%	40.07	37.8	1.1	1
EOG090F0BP3	scaffold_19	7837098	7845377	405	8280	8083	39.7	35-40%	42.97	37.8	1.1	1
EOG090F0C1A	scaffold_19	10340333	10347921	699	7589	7378	39.6	35-40%	42.37	37.8	1.1	1
EOG090F0C6Z	scaffold_19	847977	854961	651	6985	6695	44.6	40-45%	40.54	37.1	1.1	1
EOG090F0CFT	scaffold_19	11352314	11366160	357	13847	13225	43.9	40-45%	42.1	37.1	1.1	1
EOG090F04T9	scaffold_190	549035	561998	1881	12964	12612	48.6	45-50%	39.41	35.4	1.1	1
EOG090F053Z	scaffold_190	515000	535660	1347	20661	20502	48.5	45-50%	38.73	35.4	1.1	1
EOG090F08LE	scaffold_190	511767	514135	789	2369	2213	50.2	50-55%	40.72	32.7	1.2	1
EOG090F09DH	scaffold_190	801789	815142	759	13354	12630	40	40-45%	42.26	37.1	1.1	1
EOG090F0BW2	scaffold_190	504597	506362	363	1766	1762	49.3	45-50%	36.92	35.4	1	1
EOG090F031Y	scaffold_191	951799	977327	2124	25529	24791	44.6	40-45%	40.97	37.1	1.1	1
EOG090F03GB	scaffold_191	895489	951440	1728	55952	53674	41.6	40-45%	42.96	37.1	1.2	1
EOG090F09QY	scaffold_191	715389	722899	681	7511	7394	37.6	35-40%	42.24	37.8	1.1	1
EOG090F01AZ	scaffold_192	592232	647768	3351	55537	51856	38.5	35-40%	43.08	37.8	1.1	1
EOG090F026C	scaffold_192	183149	232117	2403	48969	47086	41	40-45%	42.05	37.1	1.1	1
EOG090F0A25	scaffold_192	330677	349172	549	18496	16343	43.1	40-45%	40.73	37.1	1.1	1
EOG090F0B81	scaffold_192	285089	318840	924	33752	32787	45.1	45-50%	40.82	35.4	1.2	1
EOG090F0BQW	scaffold_192	368683	383474	579	14792	14510	39.7	35-40%	43.01	37.8	1.1	1
EOG090F04GS	scaffold_193	799073	810413	1464	11341	10533	42.6	40-45%	41.41	37.1	1.1	1
EOG090F04M5	scaffold_193	507801	524959	1677	17159	16785	47.9	45-50%	36.32	35.4	1	1
EOG090F04P9	scaffold_193	819283	832622	1461	13340	11035	41.6	40-45%	41.03	37.1	1.1	1
EOG090F051Z	scaffold_193	946197	949850	1422	3654	3524	38.8	35-40%	40.23	37.8	1.1	1
EOG090F05KF	scaffold_193	701618	707709	1137	6092	6092	43.6	40-45%	41.79	37.1	1.1	1
EOG090F060H	scaffold_193	714522	745382	1419	30861	28899	42.7	40-45%	41.55	37.1	1.1	1
EOG090F06HK	scaffold_193	657661	668414	1134	10754	10165	51.8	50-55%	35.59	32.7	1.1	1
EOG090F06QP	scaffold_193	960570	979595	1242	19026	16767	38.4	35-40%	41.11	37.8	1.1	1
EOG090F0805	scaffold_193	677878	689027	948	11150	10204	56.5	55-60%	35.71	30.1	1.2	1
EOG090F0B9M	scaffold_193	677072	677649	489	578	577	59.3	55-60%	38.06	30.1	1.3	1
EOG090F0349	scaffold_194	220371	243729	2532	23359	20757	42.4	40-45%	41.14	37.1	1.1	1
EOG090F03KG	scaffold_194	88885	113899	1794	25015	22304	39.1	35-40%	42.2	37.8	1.1	1
EOG090F03S9	scaffold_194	79903	82498	1602	2596	2549	45.6	45-50%	42.13	35.4	1.2	1
EOG090F03UB	scaffold_194	743264	776305	1941	33042	32790	47.9	45-50%	38.1	35.4	1.1	1
EOG090F04S1	scaffold_194	157487	176356	1554	18870	17485	38.4	35-40%	42.16	37.8	1.1	1
EOG090F06MV	scaffold_194	459848	478750	1455	18903	18367	54.2	50-55%	35.77	32.7	1.1	1
EOG090F0BY8	scaffold_194	68450	88720	348	20271	19265	44.5	40-45%	41.07	37.1	1.1	1
EOG090F0CK1	scaffold_194	216687	218966	318	2280	2280	52.6	50-55%	31.99	32.7	1	1
EOG090F00VV	scaffold_195	831404	847767	3267	16364	16236	42.2	40-45%	44.09	37.1	1.2	1
EOG090F0136	scaffold_195	704233	781666	4449	77434	72366	38.4	35-40%	42.99	37.8	1.1	1
EOG090F0ASF	scaffold_195	906588	909748	462	3161	3031	46.5	45-50%	37.26	35.4	1.1	1
EOG090F0BUW	scaffold_195	933383	933694	312	312	312	40.4	40-45%	40.29	37.1	1.1	1
EOG090F08RW	scaffold_196	684091	722188	966	38098	35991	41.7	40-45%	42.06	37.1	1.1	1
EOG090F08SM	scaffold_196	555128	571425	810	16298	15829	46.5	45-50%	38.53	35.4	1.1	1
EOG090F098G	scaffold_196	774912	775700	789	789	789	45.9	45-50%	41.76	35.4	1.2	1
EOG090F0ADL	scaffold_196	8442	12846	627	4405	4368	42.2	40-45%	42.71	37.1	1.2	1
EOG090F0CKN	scaffold_196	187581	196956	270	9376	8998	49.1	45-50%	37.72	35.4	1.1	1
EOG090F01G2	scaffold_197	158026	204798	2676	46773	45729	39.7	35-40%	43.34	37.8	1.1	1
EOG090F02I6	scaffold_197	757180	796960	2799	39781	36028	45.6	45-50%	40.25	35.4	1.1	1
EOG090F02LN	scaffold_197	405037	461180	2370	56144	52316	39.9	35-40%	42.1	37.8	1.1	1
EOG090F0334	scaffold_197	892993	933754	1926	40762	37392	39.3	35-40%	40.79	37.8	1.1	1
EOG090F0760	scaffold_197	873665	874741	1077	1077	1077	39.8	35-40%	50.45	37.8	1.3	1
EOG090F07Q9	scaffold_197	824041	835014	1212	10974	9967	50.9	50-55%	38.13	32.7	1.2	1
EOG090F082W	scaffold_197	810841	816705	975	5865	5761	49.7	45-50%	39.98	35.4	1.1	1
EOG090F0BBX	scaffold_197	215950	231675	696	15726	15268	45.7	45-50%	39.94	35.4	1.1	1
EOG090F05GY	scaffold_198	156847	190616	3450	33770	32561	39.6	35-40%	44.31	37.8	1.2	1
EOG090F09SJ	scaffold_198	289557	292139	642	2583	2575	55.8	55-60%	39.57	30.1	1.3	1
EOG090F07O3	scaffold_199	227346	228359	1014	1014	970	49.1	45-50%	39.77	35.4	1.1	1
EOG090F0ANO	scaffold_199	74643	85362	477	10720	10303	42.8	40-45%	44.71	37.1	1.2	1
EOG090F00AL	scaffold_2	7269285	7315247	5223	45963	43997	38.9	35-40%	42.74	37.8	1.1	1
EOG090F00LF	scaffold_2	18116317	18131312	3279	14996	14493	39.1	35-40%	43.21	37.8	1.1	1
EOG090F00LX	scaffold_2	2118071	2224201	3699	106131	103293	40.7	40-45%	43.86	37.1	1.2	1
EOG090F00UB	scaffold_2	1563462	1647635	3027	84174	76329	43.5	40-45%	42.63	37.1	1.1	1
EOG090F010H	scaffold_2	12167178	12220388	4131	53211	50551	37.9	35-40%	43.16	37.8	1.1	1
EOG090F017V	scaffold_2	9251848	9290571	3444	38724	34952	37.1	35-40%	43.95	37.8	1.2	1
EOG090F0186	scaffold_2	12118269	12143409	3189	25141	23976	38.4	35-40%	44.06	37.8	1.2	1
EOG090F0188	scaffold_2	20475654	20517250	2982	41597	41056	45.9	45-50%	41	35.4	1.2	1
EOG090F01A0	scaffold_2	8255913	8314172	2820	58260	54112	36.2	35-40%	42.65	37.8	1.1	1
EOG090F01B3	scaffold_2	8210147	8239409	3003	29263	27407	36.8	35-40%	43.68	37.8	1.2	1
EOG090F01HV	scaffold_2	6408300	6441593	2568	33294	31927	39.9	35-40%	40.81	37.8	1.1	1
EOG090F01S2	scaffold_2	686666	696750	2847	10085	9994	37.9	35-40%	42.55	37.8	1.1	1
EOG090F01ZW	scaffold_2	23951777	23969701	2373	17925	17065	38.4	35-40%	44.35	37.8	1.2	1
EOG090F020U	scaffold_2	16535979	16560943	2394	24965	24661	37	35-40%	42.6	37.8	1.1	1
EOG090F024W	scaffold_2	18624519	18700173	2316	75655	73491	43.3	40-45%	43.27	37.1	1.2	1
EOG090F0267	scaffold_2	8151622	8198809	2205	47188	45587	36	35-40%	43.81	37.8	1.2	1
EOG090F0297	scaffold_2	10998434	11012404	2505	13971	13194	37.4	35-40%	43.59	37.8	1.2	1
EOG090F029G	scaffold_2	5109118	5132880	2343	23763	21704	40.7	40-45%	42.37	37.1	1.1	1
EOG090F02BF	scaffold_2	18067488	18082430	2280	14943	14750	39.9	35-40%	40.27	37.8	1.1	1
EOG090F02BM	scaffold_2	23612306	23629207	2307	16902	16345	38.6	35-40%	42.11	37.8	1.1	1
EOG090F02DQ	scaffold_2	25108070	25133213	2364	25144	23490	37	35-40%	43.83	37.8	1.2	1
EOG090F02E9	scaffold_2	18021116	18045365	3114	24250	24056	40.3	40-45%	42.4	37.1	1.1	1
EOG090F02EV	scaffold_2	15462724	15496707	2709	33984	33218	36.7	35-40%	43.03	37.8	1.1	1
EOG090F02KH	scaffold_2	13053754	13077952	2535	24199	23609	35.9	35-40%	44.08	37.8	1.2	1
EOG090F02QO	scaffold_2	15157844	15220600	1671	62757	60134	37	35-40%	42.76	37.8	1.1	1
EOG090F02RT	scaffold_2	5454385	5491287	2889	36903	35189	41.6	40-45%	43.89	37.1	1.2	1
EOG090F02T3	scaffold_2	21450893	21473059	2556	22167	21758	37.4	35-40%	44.65	37.8	1.2	1
EOG090F02WD	scaffold_2	10986869	10994939	1821	8071	8036	39.9	35-40%	42.21	37.8	1.1	1
EOG090F02X1	scaffold_2	23860595	23867405	1920	6811	6811	36.3	35-40%	43.23	37.8	1.1	1
EOG090F030B	scaffold_2	14429529	14450188	1995	20660	20182	46.9	45-50%	41.02	35.4	1.2	1
EOG090F036I	scaffold_2	12803338	12837986	2253	34649	30518	39.1	35-40%	42.87	37.8	1.1	1
EOG090F03CP	scaffold_2	14346472	14404948	1911	58477	55019	37.6	35-40%	43.41	37.8	1.1	1
EOG090F03DG	scaffold_2	18258468	18281467	1968	23000	22108	38.8	35-40%	43.26	37.8	1.1	1
EOG090F03H2	scaffold_2	19536280	19544759	1521	8480	8380	43	40-45%	40.49	37.1	1.1	1
EOG090F03K0	scaffold_2	6512542	6531762	3261	19221	19191	54	50-55%	37.22	32.7	1.1	1
EOG090F03LJ	scaffold_2	19465972	19493021	1764	27050	26718	36.7	35-40%	39.47	37.8	1	1
EOG090F03PS	scaffold_2	9158918	9190022	1290	31105	28818	36.4	35-40%	43.91	37.8	1.2	1
EOG090F041L	scaffold_2	20794373	20804405	1764	10033	9745	44.1	40-45%	41.83	37.1	1.1	1
EOG090F045I	scaffold_2	18299686	18311552	1752	11867	10712	38.2	35-40%	45.99	37.8	1.2	1
EOG090F045J	scaffold_2	9694855	9708137	1608	13283	13148	37.8	35-40%	43.97	37.8	1.2	1
EOG090F04AT	scaffold_2	19501152	19518411	1713	17260	16020	42.6	40-45%	43.22	37.1	1.2	1
EOG090F04BB	scaffold_2	23900026	23914026	1743	14001	13902	39.3	35-40%	43.1	37.8	1.1	1
EOG090F04C3	scaffold_2	14604224	14613239	1407	9016	8392	38.7	35-40%	43.81	37.8	1.2	1
EOG090F04EZ	scaffold_2	1247142	1339577	1623	92436	86918	42.8	40-45%	42.54	37.1	1.1	1
EOG090F04IS	scaffold_2	20736419	20768249	1524	31831	31393	36.9	35-40%	42.34	37.8	1.1	1
EOG090F04JY	scaffold_2	1934344	1953858	1809	19515	16850	38.9	35-40%	41.19	37.8	1.1	1
EOG090F04KT	scaffold_2	10450765	10476802	1320	26038	25697	38.8	35-40%	43.08	37.8	1.1	1
EOG090F04PE	scaffold_2	14925110	15038929	36477	113820	111749	39.2	35-40%	44.43	37.8	1.2	1
EOG090F04ZJ	scaffold_2	1986482	2006576	3585	20095	19301	49.2	45-50%	40.43	35.4	1.1	1
EOG090F0513	scaffold_2	2252982	2285161	1428	32180	31461	42.7	40-45%	43	37.1	1.2	1
EOG090F054Y	scaffold_2	16803443	16818244	1392	14802	14559	45.8	45-50%	40.88	35.4	1.2	1
EOG090F055M	scaffold_2	18290791	18298468	1461	7678	7428	38.2	35-40%	46.31	37.8	1.2	1
EOG090F059U	scaffold_2	13312581	13368452	1848	55872	53640	36.3	35-40%	42.88	37.8	1.1	1
EOG090F05CD	scaffold_2	16641422	16653835	1281	12414	12218	43.4	40-45%	42.47	37.1	1.1	1
EOG090F05G9	scaffold_2	18772927	18781736	1272	8810	8767	40.2	40-45%	42.13	37.1	1.1	1
EOG090F05GP	scaffold_2	18990677	19016042	1584	25366	24796	42	40-45%	42.5	37.1	1.1	1
EOG090F05KB	scaffold_2	11905474	11926142	1227	20669	20493	36.2	35-40%	43.09	37.8	1.1	1
EOG090F05L4	scaffold_2	11716177	11734308	1245	18132	16561	37.1	35-40%	42.39	37.8	1.1	1
EOG090F05M0	scaffold_2	23592504	23605001	1380	12498	12351	41.3	40-45%	40.89	37.1	1.1	1
EOG090F05ON	scaffold_2	12877128	12980220	1191	103093	98299	36.5	35-40%	44.33	37.8	1.2	1
EOG090F05OT	scaffold_2	23657869	23703216	1158	45348	43234	36	35-40%	43.4	37.8	1.1	1
EOG090F05RO	scaffold_2	4963472	5035008	1677	71537	69133	46	45-50%	42.53	35.4	1.2	1
EOG090F05WC	scaffold_2	24414355	24457236	795	42882	40895	36	35-40%	43.54	37.8	1.2	1
EOG090F06A6	scaffold_2	6442958	6455660	972	12703	12136	47.4	45-50%	40.13	35.4	1.1	1
EOG090F06CA	scaffold_2	10687980	10695301	1068	7322	6441	38.6	35-40%	45.58	37.8	1.2	1
EOG090F06D9	scaffold_2	18799976	18838332	1254	38357	34503	37.7	35-40%	43.03	37.8	1.1	1
EOG090F06EK	scaffold_2	6804317	6817574	1416	13258	12395	49.8	45-50%	38.57	35.4	1.1	1
EOG090F06EP	scaffold_2	23746426	23751952	1128	5527	5467	40.6	40-45%	44.36	37.1	1.2	1
EOG090F06EZ	scaffold_2	23847917	23852535	1251	4619	4605	37.2	35-40%	42.45	37.8	1.1	1
EOG090F06LV	scaffold_2	18091434	18092486	1053	1053	1053	45.1	45-50%	48.57	35.4	1.4	1
EOG090F06QN	scaffold_2	11576685	11591025	1326	14341	14209	40.3	40-45%	41.99	37.1	1.1	1
EOG090F06R2	scaffold_2	11962353	11977951	837	15599	15041	37.6	35-40%	40.04	37.8	1.1	1
EOG090F06RW	scaffold_2	13768057	13770477	1020	2421	2360	46.8	45-50%	34.91	35.4	1	1
EOG090F06T5	scaffold_2	1735139	1769670	1479	34532	33779	40.3	40-45%	43.99	37.1	1.2	1
EOG090F06UJ	scaffold_2	10363965	10364945	981	981	981	41.2	40-45%	43.44	37.1	1.2	1
EOG090F06Z0	scaffold_2	11104327	11109733	1224	5407	5342	37	35-40%	42.51	37.8	1.1	1
EOG090F0705	scaffold_2	9364453	9393216	1344	28764	27536	35.5	35-40%	44.53	37.8	1.2	1
EOG090F0714	scaffold_2	19302136	19316321	1206	14186	13874	39.6	35-40%	43.93	37.8	1.2	1
EOG090F071C	scaffold_2	13649600	13691916	1251	42317	40804	36.4	35-40%	43.54	37.8	1.2	1
EOG090F0753	scaffold_2	25211533	25223139	1293	11607	11469	36.5	35-40%	40.62	37.8	1.1	1
EOG090F078D	scaffold_2	10972983	10984221	1029	11239	10769	36	35-40%	43.39	37.8	1.1	1
EOG090F07HY	scaffold_2	3147299	3148234	936	936	934	47.9	45-50%	39.24	35.4	1.1	1
EOG090F07PX	scaffold_2	7849802	7878963	918	29162	28118	34.4	30-35%	42.57	37.8	1.1	1
EOG090F07SC	scaffold_2	13759035	13760452	843	1418	1417	46.6	45-50%	32.44	35.4	0.9	1
EOG090F07SM	scaffold_2	26246490	26264291	1215	17802	17447	37.9	35-40%	42.94	37.8	1.1	1
EOG090F07X6	scaffold_2	13849587	13875266	798	25680	25547	39.9	35-40%	42.04	37.8	1.1	1
EOG090F084V	scaffold_2	11767131	11778104	852	10974	10400	38.4	35-40%	42.92	37.8	1.1	1
EOG090F086R	scaffold_2	18559519	18591770	1101	32252	30976	40.3	40-45%	41.79	37.1	1.1	1
EOG090F08AU	scaffold_2	5195423	5212952	906	17530	17232	38.9	35-40%	42.63	37.8	1.1	1
EOG090F08DM	scaffold_2	5604470	5624318	810	19849	19636	53.3	50-55%	38.25	32.7	1.2	1
EOG090F08O7	scaffold_2	18385288	18415968	774	30681	28764	45.2	45-50%	40.74	35.4	1.2	1
EOG090F08UR	scaffold_2	11071408	11072133	726	726	725	38.6	35-40%	45.82	37.8	1.2	1
EOG090F0911	scaffold_2	17076039	17086225	669	10187	9804	41.3	40-45%	44.85	37.1	1.2	1
EOG090F095P	scaffold_2	17119309	17122569	618	3261	3261	42.7	40-45%	46.3	37.1	1.2	1
EOG090F09EN	scaffold_2	17145868	17155471	639	9604	9599	39.6	35-40%	42.85	37.8	1.1	1
EOG090F09IE	scaffold_2	10674939	10680179	702	5241	5232	35.2	35-40%	44.43	37.8	1.2	1
EOG090F09LC	scaffold_2	8143039	8153961	627	10923	10789	34.9	30-35%	43.71	37.8	1.2	1
EOG090F09MJ	scaffold_2	11109804	11114004	645	4201	4199	35	35-40%	43.85	37.8	1.2	1
EOG090F09PW	scaffold_2	26258957	26272111	642	13155	13022	42.7	40-45%	40.75	37.1	1.1	1
EOG090F0A2B	scaffold_2	3197336	3215162	627	17827	17515	47.1	45-50%	40.56	35.4	1.1	1
EOG090F0AE4	scaffold_2	18082557	18086634	675	4078	3826	42.8	40-45%	43.72	37.1	1.2	1
EOG090F0AG7	scaffold_2	18543739	18546587	657	2849	2809	46.9	45-50%	39.21	35.4	1.1	1
EOG090F0AQJ	scaffold_2	23840992	23845389	462	4398	4357	38.6	35-40%	44.44	37.8	1.2	1
EOG090F0ASA	scaffold_2	19850737	19858651	1059	7915	7336	39.9	35-40%	39.64	37.8	1	1
EOG090F0BSV	scaffold_2	14598669	14600352	315	1684	1640	36.5	35-40%	43.31	37.8	1.1	1
EOG090F0BV2	scaffold_2	21055894	21057129	306	1236	1236	38.8	35-40%	42.19	37.8	1.1	1
EOG090F0BY4	scaffold_2	19020111	19029735	306	9625	9462	40.2	40-45%	42.43	37.1	1.1	1
EOG090F0C3O	scaffold_2	5496596	5499550	387	2955	2921	41.2	40-45%	36.09	37.1	1	1
EOG090F0CLS	scaffold_2	4659425	4666034	258	6610	6152	39.9	35-40%	43.09	37.8	1.1	1
EOG090F0D1D	scaffold_2	13751666	13752734	801	1069	1069	47.8	45-50%	36.37	35.4	1	1
EOG090F01TR	scaffold_20	11396465	11423185	2859	26721	25761	45.2	45-50%	42.9	35.4	1.2	1
EOG090F01U4	scaffold_20	1836402	1880058	2595	43657	41296	39.9	35-40%	43.83	37.8	1.2	1
EOG090F01UM	scaffold_20	4454267	4490421	3276	36155	34091	37.4	35-40%	41.99	37.8	1.1	1
EOG090F01WU	scaffold_20	127630	141063	1818	13434	13214	37.2	35-40%	43.02	37.8	1.1	1
EOG090F021C	scaffold_20	9910304	9960566	4233	50263	48992	38.2	35-40%	42.26	37.8	1.1	1
EOG090F02II	scaffold_20	1696103	1719135	2154	23033	22627	39.2	35-40%	42.59	37.8	1.1	1
EOG090F02J1	scaffold_20	2122832	2145902	2856	23071	22675	36.4	35-40%	43.61	37.8	1.2	1
EOG090F02KO	scaffold_20	8362409	8390748	2082	28340	27938	43.9	40-45%	40.29	37.1	1.1	1
EOG090F02SJ	scaffold_20	8809046	8862253	1182	53208	44823	37.6	35-40%	42.65	37.8	1.1	1
EOG090F02TG	scaffold_20	10289732	10320951	2409	31220	29616	38.6	35-40%	42.29	37.8	1.1	1
EOG090F02UV	scaffold_20	7262359	7281274	2004	18916	17617	36.1	35-40%	40.95	37.8	1.1	1
EOG090F036U	scaffold_20	1883849	1932058	1767	48210	44074	38	35-40%	43.65	37.8	1.2	1
EOG090F03IY	scaffold_20	2112366	2121392	2382	9027	8710	38.4	35-40%	44.02	37.8	1.2	1
EOG090F03PI	scaffold_20	2205058	2242781	2103	37724	36202	38	35-40%	42.68	37.8	1.1	1
EOG090F03Z7	scaffold_20	11853127	11921570	1629	68444	63574	46.5	45-50%	40.63	35.4	1.1	1
EOG090F041R	scaffold_20	6258531	6302717	1473	44187	42017	39	35-40%	43.18	37.8	1.1	1
EOG090F046F	scaffold_20	3364094	3374217	921	10124	9569	37.6	35-40%	43.39	37.8	1.1	1
EOG090F04EX	scaffold_20	6237302	6255923	1902	18622	18458	41.5	40-45%	41.39	37.1	1.1	1
EOG090F04YT	scaffold_20	6088048	6126524	993	38477	35482	37.7	35-40%	42.36	37.8	1.1	1
EOG090F053U	scaffold_20	11387973	11393334	1284	5362	5214	42.8	40-45%	44.49	37.1	1.2	1
EOG090F05LW	scaffold_20	8983682	9002349	1251	18668	18234	39	35-40%	42.55	37.8	1.1	1
EOG090F05V0	scaffold_20	11359101	11384045	1329	24945	24280	42.4	40-45%	41.92	37.1	1.1	1
EOG090F05WG	scaffold_20	3331184	3337904	1224	6721	6669	44.5	40-45%	40.09	37.1	1.1	1
EOG090F05XL	scaffold_20	9391974	9423189	1359	31216	28493	39.2	35-40%	41.68	37.8	1.1	1
EOG090F05Y9	scaffold_20	3208983	3210119	1137	1137	1137	39.6	35-40%	46.57	37.8	1.2	1
EOG090F065D	scaffold_20	1800001	1808770	1128	8770	8548	38.4	35-40%	43.21	37.8	1.1	1
EOG090F0670	scaffold_20	10351312	10352556	1245	1245	1224	52.5	50-55%	38.54	32.7	1.2	1
EOG090F06MS	scaffold_20	7288521	7296592	1287	8072	7972	40.4	40-45%	38.77	37.1	1	1
EOG090F07OJ	scaffold_20	8138113	8177667	918	39555	38706	38.3	35-40%	43.54	37.8	1.2	1
EOG090F07TC	scaffold_20	6766146	6788915	1092	22770	21825	40.2	40-45%	41.84	37.1	1.1	1
EOG090F08EN	scaffold_20	5541371	5552671	837	11301	10618	40.2	40-45%	40.44	37.1	1.1	1
EOG090F08IC	scaffold_20	1623532	1628889	870	5358	5344	44.4	40-45%	43.55	37.1	1.2	1
EOG090F08Q2	scaffold_20	7808142	7818781	906	10640	9932	48.7	45-50%	39.53	35.4	1.1	1
EOG090F08QX	scaffold_20	8926304	8944957	816	18654	18239	40.9	40-45%	41.53	37.1	1.1	1
EOG090F09AF	scaffold_20	1566464	1579086	693	12623	12049	46.2	45-50%	40.89	35.4	1.2	1
EOG090F0A3R	scaffold_20	6261000	6265695	801	4696	4567	38	35-40%	43.67	37.8	1.2	1
EOG090F0A7J	scaffold_20	10375490	10399528	609	24039	22027	51.9	50-55%	35.62	32.7	1.1	1
EOG090F0ATD	scaffold_20	11631655	11649943	981	18289	16803	43.6	40-45%	43.82	37.1	1.2	1
EOG090F0AW0	scaffold_20	3693901	3695865	453	1965	1850	61.1	60-65%	31.49	27.7	1.1	1
EOG090F0C4B	scaffold_20	10066818	10076292	285	9475	8952	45.9	45-50%	39.69	35.4	1.1	1
EOG090F00GR	scaffold_200	174247	243062	4725	68816	67547	43.8	40-45%	40.51	37.1	1.1	1
EOG090F05U0	scaffold_200	335395	373004	1272	37610	34217	59.7	55-60%	29.73	30.1	1	1
EOG090F09EL	scaffold_200	445333	465481	750	20149	19880	48.4	45-50%	36.9	35.4	1	1
EOG090F09ZH	scaffold_200	164756	169718	699	4963	4941	48.6	45-50%	36.08	35.4	1	1
EOG090F0521	scaffold_201	123862	154071	1227	30210	29555	43	40-45%	41.95	37.1	1.1	1
EOG090F0AW7	scaffold_201	103365	113257	489	9893	9679	44	40-45%	40.54	37.1	1.1	1
EOG090F0D00	scaffold_201	504946	506381	201	1436	1434	38.4	35-40%	44.14	37.8	1.2	1
EOG090F00I6	scaffold_202	342566	390268	4275	47703	46043	38.4	35-40%	44.4	37.8	1.2	1
EOG090F08GY	scaffold_202	149163	156383	783	7221	6850	43.8	40-45%	40.04	37.1	1.1	1
EOG090F09M0	scaffold_202	461998	482246	564	20249	19000	38	35-40%	43.87	37.8	1.2	1
EOG090F002E	scaffold_204	527067	603723	11754	76657	70099	38.7	35-40%	42.75	37.8	1.1	1
EOG090F020Z	scaffold_204	190862	213466	3009	22605	22487	51.6	50-55%	37.41	32.7	1.1	1
EOG090F0AE2	scaffold_204	510160	522118	888	11959	10885	46.3	45-50%	38.96	35.4	1.1	1
EOG090F02DU	scaffold_205	257009	281202	2787	24194	22532	47.5	45-50%	39.47	35.4	1.1	1
EOG090F0B2Y	scaffold_205	402318	414675	1656	12358	12055	53.4	50-55%	37.94	32.7	1.2	1
EOG090F0293	scaffold_206	588295	621577	2223	33283	30802	37.7	35-40%	42.68	37.8	1.1	1
EOG090F03P9	scaffold_206	274971	299478	1197	24508	23281	39.4	35-40%	44.01	37.8	1.2	1
EOG090F03OQ	scaffold_207	711513	722167	1563	10655	9700	43.3	40-45%	41.27	37.1	1.1	1
EOG090F09CP	scaffold_207	4699	25781	867	21083	20046	47.3	45-50%	37.73	35.4	1.1	1
EOG090F09XQ	scaffold_207	471869	473718	735	1850	1082	61.2	60-65%	30.04	27.7	1.1	1
EOG090F0AN9	scaffold_207	51896	55109	528	3214	3204	59.3	55-60%	35.05	30.1	1.2	1
EOG090F0AWI	scaffold_207	30219	32969	666	2751	2708	57.5	55-60%	37.94	30.1	1.3	1
EOG090F05AK	scaffold_208	51045	70210	1335	19166	17339	41.3	40-45%	42.45	37.1	1.1	1
EOG090F05B2	scaffold_208	180925	237227	1374	56303	52326	42.6	40-45%	43.24	37.1	1.2	1
EOG090F06HJ	scaffold_208	589275	641434	1500	52160	43308	38.2	35-40%	41.97	37.8	1.1	1
EOG090F08QP	scaffold_208	137581	140685	882	3105	3082	42.8	40-45%	42.62	37.1	1.1	1
EOG090F09ZX	scaffold_208	431695	440758	663	9064	8462	42.3	40-45%	39.01	37.1	1.1	1
EOG090F052E	scaffold_209	17005	33821	1452	16817	15400	49.8	45-50%	35.36	35.4	1	1
EOG090F00PY	scaffold_21	8830691	8977304	2577	146614	142900	46	45-50%	40.97	35.4	1.2	1
EOG090F00S4	scaffold_21	3715288	3796046	3588	80759	76389	41.8	40-45%	41.47	37.1	1.1	1
EOG090F013O	scaffold_21	11525822	11595841	3327	70020	68914	46.9	45-50%	40.97	35.4	1.2	1
EOG090F01NS	scaffold_21	4202234	4255730	2706	53497	52237	38.3	35-40%	43.76	37.8	1.2	1
EOG090F01O8	scaffold_21	6272999	6289302	3315	16304	15965	37.8	35-40%	41.04	37.8	1.1	1
EOG090F02D1	scaffold_21	1113588	1177667	2751	64080	61849	41.5	40-45%	73.36	37.1	2	2
EOG090F02GM	scaffold_21	10406615	10489818	2160	83204	78265	34.8	30-35%	43.99	37.8	1.2	1
EOG090F02MU	scaffold_21	11607679	11655457	2025	47779	45738	42.9	40-45%	42.51	37.1	1.1	1
EOG090F02PJ	scaffold_21	11851511	11863633	2904	12123	11905	43.3	40-45%	41.62	37.1	1.1	1
EOG090F02UX	scaffold_21	10560104	10577221	2028	17118	16792	45.3	45-50%	41.41	35.4	1.2	1
EOG090F0371	scaffold_21	7100145	7127031	2149	26887	25221	41.7	40-45%	40.78	37.1	1.1	1
EOG090F037I	scaffold_21	12002908	12017706	1917	14799	13801	43.7	40-45%	41.93	37.1	1.1	1
EOG090F03HW	scaffold_21	8380112	8398956	2205	18845	18348	39.2	35-40%	40.88	37.8	1.1	1
EOG090F03N3	scaffold_21	6295307	6313197	1584	17891	16508	39.2	35-40%	40.71	37.8	1.1	1
EOG090F04BE	scaffold_21	2262929	2290172	1395	27244	26668	45.6	45-50%	39.48	35.4	1.1	1
EOG090F04BG	scaffold_21	354174	395817	1758	41644	40811	40.1	40-45%	43.46	37.1	1.2	1
EOG090F04NJ	scaffold_21	10747647	10774933	1473	27287	27013	42.7	40-45%	41.11	37.1	1.1	1
EOG090F04WH	scaffold_21	6256637	6278861	1389	22225	21730	38.6	35-40%	40.79	37.8	1.1	1
EOG090F04YR	scaffold_21	5911224	5917734	1392	6511	6102	46.5	45-50%	39.16	35.4	1.1	1
EOG090F057A	scaffold_21	5927967	5975215	1518	47249	46149	41.7	40-45%	40.99	37.1	1.1	1
EOG090F058A	scaffold_21	7067824	7093291	1530	25468	24630	46.2	45-50%	39.8	35.4	1.1	1
EOG090F05QU	scaffold_21	11255353	11264789	1170	9437	9353	40	40-45%	41.84	37.1	1.1	1
EOG090F05TD	scaffold_21	4687966	4719469	1221	31504	29702	37.5	35-40%	43.93	37.8	1.2	1
EOG090F05YS	scaffold_21	8362760	8369026	1170	6267	6150	41.1	40-45%	38.3	37.1	1	1
EOG090F0617	scaffold_21	11867831	11881589	1203	13759	11985	40	40-45%	42.21	37.1	1.1	1
EOG090F0619	scaffold_21	6830894	6900736	1254	69843	67577	36.7	35-40%	44.53	37.8	1.2	1
EOG090F06NS	scaffold_21	11280340	11294255	2010	13916	13219	38	35-40%	41.5	37.8	1.1	1
EOG090F06OU	scaffold_21	10929230	10940606	1182	11377	10740	57.5	55-60%	32.54	30.1	1.1	1
EOG090F06T6	scaffold_21	1263194	1279033	1278	15840	15366	39	35-40%	42.32	37.8	1.1	1
EOG090F076G	scaffold_21	10642881	10665855	930	22975	22619	38.8	35-40%	43.64	37.8	1.2	1
EOG090F07N0	scaffold_21	2299446	2318173	969	18728	17623	41.1	40-45%	41.26	37.1	1.1	1
EOG090F0823	scaffold_21	10780089	10786469	921	6381	6342	48.8	45-50%	38.83	35.4	1.1	1
EOG090F083P	scaffold_21	2744155	2749934	930	5780	5655	42	40-45%	40.53	37.1	1.1	1
EOG090F088F	scaffold_21	2456230	2463686	882	7457	7425	40.7	40-45%	42.88	37.1	1.2	1
EOG090F08CE	scaffold_21	10726739	10742936	903	16198	14261	44.8	40-45%	41.28	37.1	1.1	1
EOG090F08RE	scaffold_21	10579660	10584734	717	5075	4958	44	40-45%	43.63	37.1	1.2	1
EOG090F08UU	scaffold_21	7392539	7436504	642	43966	42806	41.3	40-45%	42.19	37.1	1.1	1
EOG090F091A	scaffold_21	2561845	2570344	582	8500	7789	41.5	40-45%	43.36	37.1	1.2	1
EOG090F095F	scaffold_21	2619695	2627981	789	8287	8047	44.8	40-45%	39.7	37.1	1.1	1
EOG090F09P2	scaffold_21	2474787	2485481	600	10695	10507	43.9	40-45%	43.35	37.1	1.2	1
EOG090F0AEE	scaffold_21	5103175	5119432	591	16258	15551	39.5	35-40%	40.98	37.8	1.1	1
EOG090F0AGT	scaffold_21	6246577	6255238	696	8662	8467	44.2	40-45%	40.23	37.1	1.1	1
EOG090F0BCZ	scaffold_21	8513766	8516917	345	3152	3028	44.5	40-45%	35.88	37.1	1	1
EOG090F0BGE	scaffold_21	10539228	10552632	504	13405	13209	48.9	45-50%	40.26	35.4	1.1	1
EOG090F0BKX	scaffold_21	4875297	4916992	867	41696	40686	42.5	40-45%	40.91	37.1	1.1	1
EOG090F0BT9	scaffold_21	8997026	9005601	396	8576	7472	36.6	35-40%	39.65	37.8	1	1
EOG090F0C1G	scaffold_21	5063277	5071279	357	8003	7589	50.7	50-55%	35.59	32.7	1.1	1
EOG090F0CFW	scaffold_21	11848387	11851386	309	3000	2818	43.4	40-45%	45.89	37.1	1.2	1
EOG090F0COS	scaffold_21	10631435	10636267	381	4833	4573	44.4	40-45%	40.5	37.1	1.1	1
EOG090F02K0	scaffold_210	333022	413935	1848	80914	77359	38	35-40%	44.53	37.8	1.2	1
EOG090F04GI	scaffold_210	109842	125234	1338	15393	14661	41.7	40-45%	41.71	37.1	1.1	1
EOG090F04H0	scaffold_210	201225	226271	1725	25047	24589	43	40-45%	41.97	37.1	1.1	1
EOG090F07KM	scaffold_210	273682	296459	1617	22778	20710	39.7	35-40%	40.87	37.8	1.1	1
EOG090F0B03	scaffold_210	751065	760396	660	9332	7686	41.3	40-45%	38.47	37.1	1	1
EOG090F0CKI	scaffold_210	28038	34817	807	6780	6219	46.3	45-50%	40.75	35.4	1.2	1
EOG090F02X0	scaffold_211	509841	544897	2130	35057	33321	39.5	35-40%	43.17	37.8	1.1	1
EOG090F06DO	scaffold_211	638480	650967	996	12488	12161	37.4	35-40%	40.48	37.8	1.1	1
EOG090F09T0	scaffold_211	383016	391149	783	8134	8040	43.2	40-45%	35.73	37.1	1	1
EOG090F03CS	scaffold_212	166871	181345	1557	14475	14334	42.6	40-45%	38.72	37.1	1	1
EOG090F03RF	scaffold_212	665814	696031	1698	30218	29830	43.3	40-45%	40.58	37.1	1.1	1
EOG090F04QA	scaffold_212	331347	354709	2481	23363	22925	45.6	45-50%	39.81	35.4	1.1	1
EOG090F07FW	scaffold_212	392964	410460	1083	17497	16794	50.5	50-55%	40.63	32.7	1.2	1
EOG090F0BWV	scaffold_212	15000	21739	309	6740	6507	48.3	45-50%	34.65	35.4	1	1
EOG090F0D56	scaffold_212	248664	255284	327	6621	6515	56.6	55-60%	33.43	30.1	1.1	1
EOG090F09B2	scaffold_213	104227	123464	939	19238	15825	53.7	50-55%	35.8	32.7	1.1	1
EOG090F05P4	scaffold_214	31486	52726	1248	21241	19788	38.9	35-40%	42.47	37.8	1.1	1
EOG090F08DJ	scaffold_215	357000	384186	846	27187	26106	40.1	40-45%	42.43	37.1	1.1	1
EOG090F09AI	scaffold_215	595840	626475	4479	30636	26276	37.3	35-40%	41.05	37.8	1.1	1
EOG090F09DP	scaffold_215	633867	637992	795	4126	4123	41.4	40-45%	37.03	37.1	1	1
EOG090F03AA	scaffold_216	268693	275787	1911	7095	7039	44.6	40-45%	40.07	37.1	1.1	1
EOG090F0546	scaffold_216	345852	350208	1521	4357	4346	57.5	55-60%	37.13	30.1	1.2	1
EOG090F05PR	scaffold_216	178200	234633	1290	56434	51713	41.2	40-45%	41.19	37.1	1.1	1
EOG090F05QD	scaffold_216	308995	315689	1377	6695	6583	57	55-60%	32.52	30.1	1.1	1
EOG090F06MW	scaffold_216	110153	116169	1098	6017	5979	55.4	55-60%	34.51	30.1	1.1	1
EOG090F06XG	scaffold_216	606527	612671	1065	6145	5578	66	65-70%	25.19	26.7	0.9	1
EOG090F05C9	scaffold_217	547964	564020	1128	16057	15297	45.1	45-50%	35.81	35.4	1	1
EOG090F09WQ	scaffold_217	572034	576858	915	4825	4606	53.5	50-55%	37	32.7	1.1	1
EOG090F04A5	scaffold_219	411960	431135	1572	19176	18780	37.2	35-40%	42.27	37.8	1.1	1
EOG090F0AA4	scaffold_219	610087	620226	735	10140	9369	49.6	45-50%	38.39	35.4	1.1	1
EOG090F00HR	scaffold_22	2553289	2628887	5361	75599	68770	39.5	35-40%	43.19	37.8	1.1	1
EOG090F00PV	scaffold_22	221128	248906	3864	27779	27645	40.2	40-45%	43.35	37.1	1.2	1
EOG090F01TN	scaffold_22	945222	976334	2538	31113	28912	35.5	35-40%	42.37	37.8	1.1	1
EOG090F0200	scaffold_22	466301	504910	3561	38610	36920	35.6	35-40%	41.9	37.8	1.1	1
EOG090F02KP	scaffold_22	6708898	6735906	2295	27009	26055	38.2	35-40%	41.33	37.8	1.1	1
EOG090F02V5	scaffold_22	6890685	6905732	1842	15048	13714	37.5	35-40%	42.49	37.8	1.1	1
EOG090F02Z2	scaffold_22	9983808	10011808	2901	28001	26285	38.4	35-40%	42.09	37.8	1.1	1
EOG090F032U	scaffold_22	249465	265997	1821	16533	15871	38.5	35-40%	42.68	37.8	1.1	1
EOG090F037M	scaffold_22	1287449	1311464	2037	24016	22284	39.7	35-40%	42.32	37.8	1.1	1
EOG090F03I4	scaffold_22	6758956	6830234	1917	71279	69698	38.9	35-40%	43.47	37.8	1.2	1
EOG090F03K9	scaffold_22	1331674	1355414	2295	23741	22581	41.2	40-45%	41.88	37.1	1.1	1
EOG090F03OL	scaffold_22	2318181	2332900	1923	14720	13747	35.8	35-40%	43.08	37.8	1.1	1
EOG090F03UN	scaffold_22	5232861	5248466	1965	15606	15440	38.8	35-40%	42.09	37.8	1.1	1
EOG090F03X3	scaffold_22	1266513	1286413	1479	19901	18772	38.2	35-40%	42.23	37.8	1.1	1
EOG090F04A6	scaffold_22	268754	280559	1530	11806	11482	38.8	35-40%	41.68	37.8	1.1	1
EOG090F04RD	scaffold_22	1486302	1497134	1392	10833	10685	39.1	35-40%	42.97	37.8	1.1	1
EOG090F0566	scaffold_22	1500766	1509051	909	8286	8069	39.4	35-40%	41.72	37.8	1.1	1
EOG090F05F5	scaffold_22	6976372	6988844	1260	12473	12443	37.9	35-40%	41.22	37.8	1.1	1
EOG090F05Q0	scaffold_22	7428689	7450479	1272	21791	15218	36.6	35-40%	42.21	37.8	1.1	1
EOG090F05T8	scaffold_22	10033372	10066297	1317	32926	31028	36.4	35-40%	41.25	37.8	1.1	1
EOG090F0644	scaffold_22	907836	933853	1221	26018	21409	40.2	40-45%	41.85	37.1	1.1	1
EOG090F075Q	scaffold_22	7488454	7489431	978	978	978	40.9	40-45%	43.93	37.1	1.2	1
EOG090F07M3	scaffold_22	7369828	7387176	855	17349	15631	44.9	40-45%	42.45	37.1	1.1	1
EOG090F07TF	scaffold_22	5762863	5773753	945	10891	10778	37.9	35-40%	42.05	37.8	1.1	1
EOG090F0815	scaffold_22	284198	322995	792	38798	35720	39.9	35-40%	42.38	37.8	1.1	1
EOG090F08E7	scaffold_22	6621176	6641971	888	20796	19545	39.4	35-40%	40.89	37.8	1.1	1
EOG090F08F9	scaffold_22	6905997	6913822	807	7826	7079	38.2	35-40%	43.21	37.8	1.1	1
EOG090F08IZ	scaffold_22	7396073	7416255	897	20183	19407	41.8	40-45%	42.01	37.1	1.1	1
EOG090F08M2	scaffold_22	2722328	2729297	828	6970	6785	40.9	40-45%	41.99	37.1	1.1	1
EOG090F08SR	scaffold_22	5185816	5207295	672	21480	20719	42.6	40-45%	42.73	37.1	1.2	1
EOG090F0902	scaffold_22	5096372	5105749	663	9378	8008	35.2	35-40%	40.84	37.8	1.1	1
EOG090F09RI	scaffold_22	6737482	6747715	579	10234	9814	40.5	40-45%	40.19	37.1	1.1	1
EOG090F0AM5	scaffold_22	4828695	4848389	516	19695	19064	36.8	35-40%	40.77	37.8	1.1	1
EOG090F07TU	scaffold_220	443044	443940	897	897	870	58.3	55-60%	37.44	30.1	1.2	1
EOG090F03M3	scaffold_221	485999	517179	1611	31181	30818	42.2	40-45%	42.27	37.1	1.1	1
EOG090F04I5	scaffold_221	542403	575435	1668	33033	32337	39.3	35-40%	41.24	37.8	1.1	1
EOG090F0627	scaffold_221	473384	481858	1239	8475	7452	46.3	45-50%	39.72	35.4	1.1	1
EOG090F06SF	scaffold_221	592561	601655	1035	9095	9013	54.1	50-55%	37.32	32.7	1.1	1
EOG090F09W6	scaffold_221	443021	451628	597	8608	8294	51.9	50-55%	35.32	32.7	1.1	1
EOG090F01J2	scaffold_223	471117	502039	2829	30923	22626	40.7	40-45%	39.21	37.1	1.1	1
EOG090F01YZ	scaffold_223	515485	548224	2523	32740	28909	39.9	35-40%	41.49	37.8	1.1	1
EOG090F07H2	scaffold_223	144898	157290	1254	12393	12263	39.6	35-40%	39.82	37.8	1.1	1
EOG090F03TR	scaffold_224	417153	427038	1872	9886	9774	48.8	45-50%	37.67	35.4	1.1	1
EOG090F03AB	scaffold_225	427254	444698	2025	17445	16243	41.5	40-45%	41.54	37.1	1.1	1
EOG090F04QE	scaffold_225	351192	364344	1263	13153	12850	40.6	40-45%	44.89	37.1	1.2	1
EOG090F04RM	scaffold_225	502653	526113	1446	23461	22275	43.3	40-45%	42.03	37.1	1.1	1
EOG090F07DS	scaffold_225	390979	399242	1596	8264	7849	51.2	50-55%	39.66	32.7	1.2	1
EOG090F0878	scaffold_225	448615	459606	804	10992	10625	38.8	35-40%	41.9	37.8	1.1	1
EOG090F0B3U	scaffold_225	403282	409114	483	5833	5812	43.4	40-45%	42.45	37.1	1.1	1
EOG090F02DB	scaffold_226	315988	318501	2514	2514	2513	40.9	40-45%	38	37.1	1	1
EOG090F0450	scaffold_229	425740	449852	1662	24113	23587	42.1	40-45%	42.51	37.1	1.1	1
EOG090F0A90	scaffold_229	298313	307658	567	9346	9187	41.1	40-45%	40.28	37.1	1.1	1
EOG090F0C07	scaffold_229	24097	35507	465	11411	11346	45.8	45-50%	39.77	35.4	1.1	1
EOG090F001C	scaffold_23	3681224	3775815	11997	94592	91943	40.5	40-45%	45.08	37.1	1.2	1
EOG090F00XS	scaffold_23	6790935	6852842	6339	61908	58304	40.3	40-45%	43.66	37.1	1.2	1
EOG090F013B	scaffold_23	839617	891981	2967	52365	50337	38.1	35-40%	44.3	37.8	1.2	1
EOG090F015R	scaffold_23	4501645	4539343	2865	37699	36699	42.9	40-45%	41.37	37.1	1.1	1
EOG090F019S	scaffold_23	6731026	6762680	3237	31655	31369	36.7	35-40%	42.76	37.8	1.1	1
EOG090F01HP	scaffold_23	1203970	1225541	3045	21572	21435	41	40-45%	43.73	37.1	1.2	1
EOG090F01TX	scaffold_23	643594	689173	2571	45580	40195	43.6	40-45%	40.46	37.1	1.1	1
EOG090F0259	scaffold_23	3221622	3263707	2829	42086	41014	36.8	35-40%	42.88	37.8	1.1	1
EOG090F02AV	scaffold_23	7003266	7019157	2199	15892	15696	37.7	35-40%	43.26	37.8	1.1	1
EOG090F02RD	scaffold_23	4076445	4104040	2079	27596	27242	38.1	35-40%	44.11	37.8	1.2	1
EOG090F02WO	scaffold_23	789543	819141	1872	29599	29033	40.4	40-45%	43.65	37.1	1.2	1
EOG090F03EQ	scaffold_23	8457892	8485795	1617	27904	27075	46.3	45-50%	41.56	35.4	1.2	1
EOG090F03LM	scaffold_23	7952350	7986066	1683	33717	33239	45	45-50%	40.15	35.4	1.1	1
EOG090F03P0	scaffold_23	6212146	6213732	1587	1587	1587	43.2	40-45%	39.94	37.1	1.1	1
EOG090F03PL	scaffold_23	3116855	3121499	1674	4645	4640	42.4	40-45%	44.2	37.1	1.2	1
EOG090F03QT	scaffold_23	8509779	8538958	1743	29180	28646	43.9	40-45%	39.78	37.1	1.1	1
EOG090F03VT	scaffold_23	1123439	1153265	1665	29827	28080	38.6	35-40%	44.1	37.8	1.2	1
EOG090F03XO	scaffold_23	3411144	3476101	1869	64958	63071	39.6	35-40%	44.82	37.8	1.2	1
EOG090F03Y6	scaffold_23	1235391	1256951	1602	21561	19897	36	35-40%	44.85	37.8	1.2	1
EOG090F04I6	scaffold_23	7380689	7403749	1521	23061	22713	43.1	40-45%	40.91	37.1	1.1	1
EOG090F04J3	scaffold_23	1024861	1035261	1803	10401	10168	44.4	40-45%	40.72	37.1	1.1	1
EOG090F04K4	scaffold_23	8578783	8592950	1770	14168	13915	38.7	35-40%	44.22	37.8	1.2	1
EOG090F04KM	scaffold_23	3545460	3567217	1518	21758	21046	40.8	40-45%	44.07	37.1	1.2	1
EOG090F05U6	scaffold_23	165729	201069	1149	35341	33634	37.3	35-40%	44.74	37.8	1.2	1
EOG090F05VT	scaffold_23	11313942	11360194	1212	46253	45552	40.3	40-45%	42.9	37.1	1.2	1
EOG090F068M	scaffold_23	3399822	3410388	1044	10567	10401	41.2	40-45%	42.86	37.1	1.2	1
EOG090F06DD	scaffold_23	8658255	8691909	1215	33655	32284	41.8	40-45%	41.07	37.1	1.1	1
EOG090F06Q0	scaffold_23	11289191	11304244	1077	15054	14812	40.4	40-45%	40.25	37.1	1.1	1
EOG090F0743	scaffold_23	585991	594943	1041	8953	8943	37.4	35-40%	43.09	37.8	1.1	1
EOG090F075X	scaffold_23	8169369	8205234	1068	35866	34053	48.8	45-50%	38.02	35.4	1.1	1
EOG090F076M	scaffold_23	6985933	6997645	984	11713	11507	40.5	40-45%	42.05	37.1	1.1	1
EOG090F076V	scaffold_23	4246612	4274681	1098	28070	25993	41.7	40-45%	42.92	37.1	1.2	1
EOG090F07H4	scaffold_23	8227290	8244683	1128	17394	16535	48.9	45-50%	38.03	35.4	1.1	1
EOG090F07I5	scaffold_23	705464	715919	1770	10456	10332	42.7	40-45%	40.32	37.1	1.1	1
EOG090F07SR	scaffold_23	730317	748417	888	18101	16799	43.1	40-45%	41.97	37.1	1.1	1
EOG090F0859	scaffold_23	7117962	7135555	888	17594	17370	44	40-45%	39.12	37.1	1.1	1
EOG090F087U	scaffold_23	6673102	6690606	867	17505	16145	36.6	35-40%	44.14	37.8	1.2	1
EOG090F08WL	scaffold_23	4858687	4873949	897	15263	14983	40.8	40-45%	43.09	37.1	1.2	1
EOG090F09FP	scaffold_23	8491064	8502072	597	11009	10829	51.8	50-55%	39.26	32.7	1.2	1
EOG090F09LG	scaffold_23	6483804	6493168	723	9365	8866	35.8	35-40%	43.08	37.8	1.1	1
EOG090F0A04	scaffold_23	4328708	4344465	669	15758	14352	35.7	35-40%	43.69	37.8	1.2	1
EOG090F0AB5	scaffold_23	6693119	6698033	1032	4915	4904	39.9	35-40%	42.86	37.8	1.1	1
EOG090F0B5D	scaffold_23	984501	993772	528	9272	8999	39.3	35-40%	43.03	37.8	1.1	1
EOG090F0B9X	scaffold_23	6982721	6985177	453	2457	2414	46.4	45-50%	41.45	35.4	1.2	1
EOG090F0BTT	scaffold_23	1180163	1203409	312	23247	22592	44.5	40-45%	41.29	37.1	1.1	1
EOG090F0BVH	scaffold_23	7947971	7952293	315	4323	4256	53.7	50-55%	37.11	32.7	1.1	1
EOG090F0BWZ	scaffold_23	8206995	8213106	405	6112	6061	54.4	50-55%	34.07	32.7	1	1
EOG090F0C2L	scaffold_23	8629693	8641378	327	11686	11639	43.1	40-45%	40.87	37.1	1.1	1
EOG090F06I3	scaffold_230	51915	68234	1170	16320	15578	49.6	45-50%	36.71	35.4	1	1
EOG090F06Y2	scaffold_230	179209	196239	1053	17031	16076	42	40-45%	40.8	37.1	1.1	1
EOG090F09H9	scaffold_230	413357	430441	642	17085	16960	47.7	45-50%	40.75	35.4	1.2	1
EOG090F0BPS	scaffold_230	516490	525549	633	9060	8998	56	55-60%	35.15	30.1	1.2	1
EOG090F02YM	scaffold_231	20643	41972	1968	21330	20958	52.4	50-55%	37.66	32.7	1.2	1
EOG090F03WH	scaffold_231	238305	283085	1716	44781	42702	47.9	45-50%	40.03	35.4	1.1	1
EOG090F04E9	scaffold_231	85812	88323	1566	2512	2370	56.5	55-60%	33.8	30.1	1.1	1
EOG090F04ID	scaffold_231	181812	193013	1839	11202	9454	42.7	40-45%	42.64	37.1	1.1	1
EOG090F0589	scaffold_231	48711	60783	1314	12073	10424	38.7	35-40%	39.69	37.8	1.1	1
EOG090F06HQ	scaffold_231	286685	292554	1713	5870	5772	47.9	45-50%	40.06	35.4	1.1	1
EOG090F02SP	scaffold_232	149824	182940	1944	33117	31754	40.6	40-45%	41.02	37.1	1.1	1
EOG090F03WG	scaffold_232	69502	71385	1884	1884	1881	40	40-45%	41.95	37.1	1.1	1
EOG090F0AUR	scaffold_232	426390	430769	441	4380	3608	38.4	35-40%	39.34	37.8	1	1
EOG090F04XE	scaffold_233	22507	37626	1083	15120	14042	40.8	40-45%	42.44	37.1	1.1	1
EOG090F051M	scaffold_233	14016	20713	1566	6698	6642	41.1	40-45%	37.79	37.1	1	1
EOG090F05VS	scaffold_233	236435	249961	1182	13527	12638	43.1	40-45%	42.82	37.1	1.2	1
EOG090F099S	scaffold_233	268323	287933	939	19611	19066	48	45-50%	39.41	35.4	1.1	1
EOG090F0A1U	scaffold_233	127524	135396	1257	7873	7840	47.2	45-50%	40.62	35.4	1.1	1
EOG090F0AF7	scaffold_233	252148	259245	642	7098	6644	48.5	45-50%	40.34	35.4	1.1	1
EOG090F01CQ	scaffold_238	316914	368438	3063	51525	50566	43.7	40-45%	41.71	37.1	1.1	1
EOG090F03GT	scaffold_238	192153	229139	1650	36987	34868	35.4	35-40%	43.08	37.8	1.1	1
EOG090F04C0	scaffold_238	36973	56675	1698	19703	19606	42.4	40-45%	44.17	37.1	1.2	1
EOG090F09N1	scaffold_238	18265	29390	654	11126	10888	38.9	35-40%	41	37.8	1.1	1
EOG090F00CN	scaffold_24	2982047	3017206	5607	35160	34482	40.5	40-45%	41.82	37.1	1.1	1
EOG090F00GI	scaffold_24	555837	599206	4557	43370	40474	40.6	40-45%	42.98	37.1	1.2	1
EOG090F024M	scaffold_24	3401702	3455497	2325	53796	52505	38.6	35-40%	42.5	37.8	1.1	1
EOG090F025Q	scaffold_24	8564538	8598720	2169	34183	33226	39.9	35-40%	42.48	37.8	1.1	1
EOG090F026Q	scaffold_24	353892	363809	2229	9918	9669	59.1	55-60%	35.56	30.1	1.2	1
EOG090F02G2	scaffold_24	3901647	3989535	1791	87889	86018	39.9	35-40%	42.41	37.8	1.1	1
EOG090F02IS	scaffold_24	2304725	2376664	2370	71940	69721	37.9	35-40%	45.11	37.8	1.2	1
EOG090F02L3	scaffold_24	2949686	2979474	2004	29789	28882	35.7	35-40%	41.81	37.8	1.1	1
EOG090F02NM	scaffold_24	3325821	3347430	2328	21610	20383	37.8	35-40%	43.99	37.8	1.2	1
EOG090F034P	scaffold_24	1927165	1976711	1977	49547	46305	34.9	30-35%	43.42	37.8	1.1	1
EOG090F03BE	scaffold_24	656735	660647	1686	3913	3661	46.5	45-50%	39.54	35.4	1.1	1
EOG090F03EF	scaffold_24	3367662	3374430	1848	6769	6354	45.3	45-50%	42.49	35.4	1.2	1
EOG090F03F0	scaffold_24	2682839	2701409	1581	18571	18331	44.1	40-45%	41.85	37.1	1.1	1
EOG090F03OH	scaffold_24	285837	321786	1797	35950	35010	49.2	45-50%	39.81	35.4	1.1	1
EOG090F03TL	scaffold_24	3481092	3486021	1512	4930	4919	40.4	40-45%	45.37	37.1	1.2	1
EOG090F049X	scaffold_24	4525899	4532072	1569	6174	5841	49.4	45-50%	36.33	35.4	1	1
EOG090F04QS	scaffold_24	126829	173469	1491	46641	45388	46.4	45-50%	40.46	35.4	1.1	1
EOG090F055I	scaffold_24	8499570	8524873	1470	25304	23374	39.9	35-40%	42.32	37.8	1.1	1
EOG090F0562	scaffold_24	5035185	5036468	1284	1284	1284	50.4	50-55%	39.68	32.7	1.2	1
EOG090F05AH	scaffold_24	878878	886294	1659	7417	7268	38.3	35-40%	42.86	37.8	1.1	1
EOG090F05BI	scaffold_24	3348474	3364370	1437	15897	15747	40.4	40-45%	43.78	37.1	1.2	1
EOG090F05FS	scaffold_24	5012051	5013244	1194	1194	1193	45	45-50%	40.98	35.4	1.2	1
EOG090F05JD	scaffold_24	4567488	4602099	1503	34612	32293	49	45-50%	38.44	35.4	1.1	1
EOG090F05KE	scaffold_24	2982889	2999350	1623	16462	16271	44.2	40-45%	43.07	37.1	1.2	1
EOG090F05UP	scaffold_24	9180109	9187246	1008	7138	6565	45.4	45-50%	40.52	35.4	1.1	1
EOG090F065E	scaffold_24	54107	63083	1410	8977	8977	51.8	50-55%	38.87	32.7	1.2	1
EOG090F06LB	scaffold_24	3021279	3028527	1104	7249	7206	46.6	45-50%	40.24	35.4	1.1	1
EOG090F06LP	scaffold_24	9308515	9351553	1026	43039	36588	44.4	40-45%	40.35	37.1	1.1	1
EOG090F06PR	scaffold_24	3110144	3141718	1104	31575	30412	44.9	40-45%	42.24	37.1	1.1	1
EOG090F06QW	scaffold_24	3151164	3156489	1092	5326	5232	40.8	40-45%	40.7	37.1	1.1	1
EOG090F0716	scaffold_24	4083912	4093198	1056	9287	9221	39.3	35-40%	295.73	37.8	7.8	8
EOG090F07ZK	scaffold_24	3583789	3636847	1008	53059	51747	38	35-40%	43.76	37.8	1.2	1
EOG090F080L	scaffold_24	612119	630121	1299	18003	17386	38.1	35-40%	42.06	37.8	1.1	1
EOG090F081K	scaffold_24	9046412	9058121	789	11710	11191	39.5	35-40%	43.49	37.8	1.2	1
EOG090F089G	scaffold_24	7482770	7500869	975	18100	17322	37	35-40%	43.61	37.8	1.2	1
EOG090F08C3	scaffold_24	683526	684512	987	987	946	45	45-50%	36.11	35.4	1	1
EOG090F08VS	scaffold_24	2071177	2097920	717	26744	25908	42.5	40-45%	40.28	37.1	1.1	1
EOG090F09HE	scaffold_24	1903967	1920514	504	16548	16311	38.3	35-40%	45.27	37.8	1.2	1
EOG090F09SA	scaffold_24	1891897	1907222	855	15326	15047	40.7	40-45%	44.19	37.1	1.2	1
EOG090F0AAR	scaffold_24	3157766	3169910	1353	12145	11484	39.2	35-40%	43.25	37.8	1.1	1
EOG090F0ABQ	scaffold_24	8858376	8880242	1221	21867	19276	40.9	40-45%	41.31	37.1	1.1	1
EOG090F0AUZ	scaffold_24	8537851	8550256	891	12406	11564	43.1	40-45%	42.47	37.1	1.1	1
EOG090F0AXX	scaffold_24	6507070	6524817	861	17748	16311	51.5	50-55%	36.28	32.7	1.1	1
EOG090F0B5P	scaffold_24	6051565	6058983	399	7419	7318	43.6	40-45%	35.9	37.1	1	1
EOG090F0BNM	scaffold_24	268632	272105	420	3474	3214	42.6	40-45%	37.38	37.1	1	1
EOG090F0BTL	scaffold_24	2184682	2185086	405	405	405	49.6	45-50%	46.8	35.4	1.3	1
EOG090F0CCU	scaffold_24	3496618	3497496	291	879	878	44.5	40-45%	40.1	37.1	1.1	1
EOG090F0497	scaffold_241	172958	188001	2019	15044	14321	46.1	45-50%	40.71	35.4	1.2	1
EOG090F05Z1	scaffold_241	349018	350211	1194	1194	1194	39.9	35-40%	39.36	37.8	1	1
EOG090F0ADK	scaffold_241	242916	256076	513	13161	12930	42.8	40-45%	42.04	37.1	1.1	1
EOG090F07FD	scaffold_242	251534	273629	1185	22096	21766	60.1	60-65%	34.14	27.7	1.2	1
EOG090F00QJ	scaffold_243	84774	128650	4905	43877	40682	60.8	60-65%	29.55	27.7	1.1	1
EOG090F0ATG	scaffold_244	168633	176481	762	7849	6895	56.8	55-60%	33.24	30.1	1.1	1
EOG090F048T	scaffold_246	260886	300679	1572	39794	30211	38.5	35-40%	39.43	37.8	1	1
EOG090F0040	scaffold_25	4151175	4189401	8589	38227	37531	42.1	40-45%	42.43	37.1	1.1	1
EOG090F00GW	scaffold_25	3979529	4051763	5193	72235	70135	44.8	40-45%	40.33	37.1	1.1	1
EOG090F0174	scaffold_25	75356	158030	3654	82675	75306	36.1	35-40%	41.91	37.8	1.1	1
EOG090F01N5	scaffold_25	1970719	2087239	2742	116521	109176	36.3	35-40%	42.99	37.8	1.1	1
EOG090F01R1	scaffold_25	11372018	11396039	2511	24022	22373	39.9	35-40%	42.24	37.8	1.1	1
EOG090F01UN	scaffold_25	8767686	8790496	2463	22811	22466	37.6	35-40%	42.88	37.8	1.1	1
EOG090F01WR	scaffold_25	5757535	5807035	2514	49501	46387	43.3	40-45%	40.77	37.1	1.1	1
EOG090F0231	scaffold_25	252667	279637	2589	26971	26129	37.8	35-40%	42.83	37.8	1.1	1
EOG090F02YE	scaffold_25	2679200	2712579	3147	33380	32011	37.7	35-40%	42.58	37.8	1.1	1
EOG090F03AE	scaffold_25	177818	194296	1950	16479	15789	45.9	45-50%	40.83	35.4	1.2	1
EOG090F03SZ	scaffold_25	8563474	8597419	1689	33946	33284	37.6	35-40%	42.22	37.8	1.1	1
EOG090F04CA	scaffold_25	9568292	9602442	1410	34151	32970	42.2	40-45%	41.97	37.1	1.1	1
EOG090F04LE	scaffold_25	2116428	2128732	1038	12305	11457	48.9	45-50%	40.55	35.4	1.1	1
EOG090F05MV	scaffold_25	7549878	7554216	1056	4339	4327	38.1	35-40%	43.51	37.8	1.2	1
EOG090F05WU	scaffold_25	2731075	2763799	1506	32725	29746	39.7	35-40%	41.95	37.8	1.1	1
EOG090F068N	scaffold_25	695299	705895	1176	10597	10553	42.3	40-45%	41.4	37.1	1.1	1
EOG090F06E1	scaffold_25	4609198	4634432	1677	25235	24302	35.4	35-40%	44.26	37.8	1.2	1
EOG090F06FG	scaffold_25	4359503	4384044	1347	24542	23942	41.7	40-45%	40.9	37.1	1.1	1
EOG090F06HM	scaffold_25	11349952	11368285	1284	18334	17301	42.5	40-45%	43.79	37.1	1.2	1
EOG090F06IJ	scaffold_25	3088531	3101738	963	13208	12426	38.9	35-40%	43.48	37.8	1.2	1
EOG090F06TR	scaffold_25	816629	823110	1239	6482	5986	39.8	35-40%	42.62	37.8	1.1	1
EOG090F06XP	scaffold_25	6850393	6875553	1095	25161	23840	40.6	40-45%	42.2	37.1	1.1	1
EOG090F0749	scaffold_25	625822	647021	999	21200	20827	37.4	35-40%	41.47	37.8	1.1	1
EOG090F08PL	scaffold_25	8757038	8764070	741	7033	6935	40.9	40-45%	40.23	37.1	1.1	1
EOG090F08X2	scaffold_25	8797929	8824361	1146	26433	24185	38.7	35-40%	41.97	37.8	1.1	1
EOG090F09G0	scaffold_25	8470787	8471524	738	738	738	46.7	45-50%	43.58	35.4	1.2	1
EOG090F09P9	scaffold_25	6944911	6951761	537	6851	6632	43.9	40-45%	37	37.1	1	1
EOG090F09UD	scaffold_25	11263646	11265257	588	1612	1545	44.3	40-45%	37.51	37.1	1	1
EOG090F0ABG	scaffold_25	6878481	6885572	774	7092	6897	39.1	35-40%	42.32	37.8	1.1	1
EOG090F0ACP	scaffold_25	4068404	4079890	867	11487	10911	40	40-45%	40.58	37.1	1.1	1
EOG090F0AEF	scaffold_25	6244949	6248472	618	3524	3352	47.4	45-50%	39.49	35.4	1.1	1
EOG090F0AO5	scaffold_25	3777995	3803597	486	25603	24823	42.6	40-45%	41.4	37.1	1.1	1
EOG090F0AZQ	scaffold_25	4439329	4464127	537	24799	24457	37.6	35-40%	40.82	37.8	1.1	1
EOG090F05SF	scaffold_253	141369	150442	1161	9074	8975	61.4	60-65%	33.15	27.7	1.2	1
EOG090F08CW	scaffold_253	264	4731	792	4468	4131	57.9	55-60%	83.68	30.1	2.8	3
EOG090F04L1	scaffold_255	257661	303701	1335	46041	37254	45.2	45-50%	273.85	35.4	7.7	8
EOG090F03O4	scaffold_256	205214	243540	3057	38327	35433	37.3	35-40%	40.79	37.8	1.1	1
EOG090F02OS	scaffold_257	5499	47462	1425	41964	39214	54.9	50-55%	36.59	32.7	1.1	1
EOG090F03GC	scaffold_259	121762	142500	2046	20739	20171	34.9	30-35%	45.61	37.8	1.2	1
EOG090F03SO	scaffold_259	93324	103963	1116	10640	10527	34.8	30-35%	44.12	37.8	1.2	1
EOG090F04J4	scaffold_259	180203	201644	1329	21442	20977	39.6	35-40%	41.95	37.8	1.1	1
EOG090F08KF	scaffold_259	47655	69906	1563	22252	21081	34.8	30-35%	43.87	37.8	1.2	1
EOG090F008A	scaffold_26	2574357	2687095	6033	112739	105782	35.6	35-40%	43.2	37.8	1.1	1
EOG090F01BF	scaffold_26	11150296	11199358	3489	49063	46966	36.3	35-40%	43.62	37.8	1.2	1
EOG090F01IP	scaffold_26	4578595	4625271	2760	46677	42992	44.8	40-45%	42.26	37.1	1.1	1
EOG090F027O	scaffold_26	4073218	4116290	2466	43073	41103	36	35-40%	43.01	37.8	1.1	1
EOG090F02D7	scaffold_26	4364105	4376491	2349	12387	12292	35.6	35-40%	40.98	37.8	1.1	1
EOG090F02R5	scaffold_26	4675534	4696318	2184	20785	20576	36.8	35-40%	41.56	37.8	1.1	1
EOG090F02T2	scaffold_26	6616378	6661373	2220	44996	43965	35.7	35-40%	42.65	37.8	1.1	1
EOG090F02WR	scaffold_26	10717139	10728560	2076	11422	10387	48.6	45-50%	39.07	35.4	1.1	1
EOG090F02XF	scaffold_26	8410829	8428101	1653	17273	17000	45.1	45-50%	42.18	35.4	1.2	1
EOG090F02XP	scaffold_26	1341816	1343804	1989	1989	1989	47.7	45-50%	43.81	35.4	1.2	1
EOG090F02YU	scaffold_26	2541204	2564500	2193	23297	23162	38.2	35-40%	43.29	37.8	1.1	1
EOG090F033E	scaffold_26	5306869	5328256	1746	21388	20600	45	45-50%	39.35	35.4	1.1	1
EOG090F036T	scaffold_26	9029278	9060035	1566	30758	29338	39.7	35-40%	42.06	37.8	1.1	1
EOG090F03FF	scaffold_26	8181527	8208567	1398	27041	26181	37.4	35-40%	43.68	37.8	1.2	1
EOG090F03FG	scaffold_26	9984373	10011903	1692	27531	27174	37.5	35-40%	43.2	37.8	1.1	1
EOG090F03FJ	scaffold_26	3892782	3919204	1779	26423	25503	36.6	35-40%	42.32	37.8	1.1	1
EOG090F03IC	scaffold_26	3223091	3262523	1803	39433	35246	36.6	35-40%	40.9	37.8	1.1	1
EOG090F03J9	scaffold_26	10367969	10396054	1704	28086	27223	37	35-40%	42.07	37.8	1.1	1
EOG090F03ZW	scaffold_26	10673969	10694181	2124	20213	19396	49.7	45-50%	39.4	35.4	1.1	1
EOG090F04FO	scaffold_26	8983070	9018813	1278	35744	29775	36.8	35-40%	42.69	37.8	1.1	1
EOG090F04JJ	scaffold_26	2705357	2750694	1746	45338	41483	36.2	35-40%	41.37	37.8	1.1	1
EOG090F04KJ	scaffold_26	4241979	4300857	1425	58879	53045	41.6	40-45%	43.37	37.1	1.2	1
EOG090F04R2	scaffold_26	8923074	8940068	1383	16995	13130	36.7	35-40%	41.17	37.8	1.1	1
EOG090F04ZQ	scaffold_26	4191809	4214984	1425	23176	22222	39.2	35-40%	42.27	37.8	1.1	1
EOG090F050C	scaffold_26	8442538	8456712	1509	14175	13458	45.2	45-50%	42.52	35.4	1.2	1
EOG090F05B6	scaffold_26	4632942	4653994	1293	21053	20906	39.5	35-40%	42.76	37.8	1.1	1
EOG090F05DM	scaffold_26	2468739	2477648	1248	8910	8312	38.2	35-40%	42	37.8	1.1	1
EOG090F05O5	scaffold_26	5602888	5606509	1260	3622	3519	39.5	35-40%	47.35	37.8	1.3	1
EOG090F05OH	scaffold_26	6764756	6810387	1353	45632	41861	36.2	35-40%	41.98	37.8	1.1	1
EOG090F05WZ	scaffold_26	6495607	6496752	1146	1146	1146	43.4	40-45%	40.98	37.1	1.1	1
EOG090F05X2	scaffold_26	5516625	5521309	1263	4685	4556	43.7	40-45%	42.21	37.1	1.1	1
EOG090F061O	scaffold_26	3351497	3354400	960	2904	2903	49.2	45-50%	36.45	35.4	1	1
EOG090F067N	scaffold_26	4761751	4796747	945	34997	34192	43.4	40-45%	42.98	37.1	1.2	1
EOG090F06PB	scaffold_26	4347038	4359751	1092	12714	12552	37.3	35-40%	40.78	37.8	1.1	1
EOG090F06SH	scaffold_26	10809415	10814149	1293	4735	4687	41.6	40-45%	43.51	37.1	1.2	1
EOG090F075A	scaffold_26	2270806	2284611	1011	13806	10519	40.2	40-45%	40.86	37.1	1.1	1
EOG090F077B	scaffold_26	8462344	8474460	1266	12117	11513	48.3	45-50%	37.94	35.4	1.1	1
EOG090F079F	scaffold_26	8813250	8833892	963	20643	19156	43.8	40-45%	41.29	37.1	1.1	1
EOG090F07FN	scaffold_26	10950624	10975776	924	25153	24762	41.4	40-45%	42.27	37.1	1.1	1
EOG090F07JR	scaffold_26	4937346	4947392	1251	10047	9658	42.8	40-45%	40.22	37.1	1.1	1
EOG090F07OL	scaffold_26	8882387	8899942	1092	17556	16315	43.8	40-45%	40.79	37.1	1.1	1
EOG090F07VW	scaffold_26	8847580	8871748	1296	24169	23604	41	40-45%	42.22	37.1	1.1	1
EOG090F07YQ	scaffold_26	5927219	5947835	2619	20617	19861	40.1	40-45%	43.86	37.1	1.2	1
EOG090F09F4	scaffold_26	10056925	10062669	636	5745	5667	39.6	35-40%	41.74	37.8	1.1	1
EOG090F0AW1	scaffold_26	11044594	11052391	573	7798	6792	39.6	35-40%	38.27	37.8	1	1
EOG090F0B3N	scaffold_26	6584215	6585264	420	1050	1047	38.1	35-40%	45.7	37.8	1.2	1
EOG090F0C2M	scaffold_26	6122864	6128731	303	5868	5816	42.4	40-45%	41.88	37.1	1.1	1
EOG090F049Q	scaffold_261	29762	51323	1701	21562	16168	43.1	40-45%	37.28	37.1	1	1
EOG090F052Q	scaffold_261	159129	202996	1593	43868	37709	45.2	45-50%	42.07	35.4	1.2	1
EOG090F0A3B	scaffold_261	102544	114354	732	11811	10831	58.1	55-60%	35.93	30.1	1.2	1
EOG090F0AB8	scaffold_261	89728	99940	699	10213	9461	55.5	55-60%	36.15	30.1	1.2	1
EOG090F05RG	scaffold_262	7224	25171	1671	17948	17022	60.5	60-65%	34.2	27.7	1.2	1
EOG090F01KR	scaffold_266	122584	168176	2814	45593	43041	43.3	40-45%	41.94	37.1	1.1	1
EOG090F07IA	scaffold_266	14264	23584	1008	9321	9297	46.4	45-50%	37.93	35.4	1.1	1
EOG090F01F7	scaffold_27	4413999	4488950	3072	74952	71970	35	35-40%	43.66	37.8	1.2	1
EOG090F01FW	scaffold_27	7937655	7979877	3459	42223	41569	39.9	35-40%	43.58	37.8	1.2	1
EOG090F01PI	scaffold_27	6315127	6372920	2835	57794	53001	35.1	35-40%	42.63	37.8	1.1	1
EOG090F01PS	scaffold_27	6625379	6656590	2604	31212	30500	40.2	40-45%	40.94	37.1	1.1	1
EOG090F01SK	scaffold_27	3121470	3175878	2469	54409	51926	37.4	35-40%	44.68	37.8	1.2	1
EOG090F027R	scaffold_27	1547660	1559174	2748	11515	11205	43.1	40-45%	39.92	37.1	1.1	1
EOG090F02FU	scaffold_27	9277746	9296211	2124	18466	18216	38.7	35-40%	43.54	37.8	1.2	1
EOG090F02KA	scaffold_27	1386430	1417277	2592	30848	27544	35.2	35-40%	42.31	37.8	1.1	1
EOG090F02M0	scaffold_27	4229696	4280298	2154	50603	49880	38	35-40%	43.84	37.8	1.2	1
EOG090F03DQ	scaffold_27	6917959	6933868	1890	15910	15761	42.4	40-45%	38.62	37.1	1	1
EOG090F03EE	scaffold_27	7887048	7925952	1710	38905	37849	38.1	35-40%	43.28	37.8	1.1	1
EOG090F03QJ	scaffold_27	11008023	11028149	1587	20127	19067	38.5	35-40%	42.21	37.8	1.1	1
EOG090F03RI	scaffold_27	859682	869599	1926	9918	9580	42.1	40-45%	40.72	37.1	1.1	1
EOG090F041E	scaffold_27	9267184	9276376	1488	9193	9045	40.9	40-45%	43.54	37.1	1.2	1
EOG090F041I	scaffold_27	3034383	3059098	1584	24716	24491	37	35-40%	44.17	37.8	1.2	1
EOG090F048F	scaffold_27	4301169	4310385	1560	9217	8704	41.3	40-45%	42.78	37.1	1.2	1
EOG090F05HJ	scaffold_27	2942167	2963647	1425	21481	21080	38.5	35-40%	43	37.8	1.1	1
EOG090F05N6	scaffold_27	11095918	11122205	1386	26288	24586	42.8	40-45%	43.45	37.1	1.2	1
EOG090F060U	scaffold_27	3244996	3251318	1143	6323	6264	36.6	35-40%	41.04	37.8	1.1	1
EOG090F063J	scaffold_27	6769971	6786987	1548	17017	15010	39.6	35-40%	40.73	37.8	1.1	1
EOG090F066O	scaffold_27	10690845	10711289	1368	20445	18095	39.3	35-40%	40.62	37.8	1.1	1
EOG090F069B	scaffold_27	4472737	4489806	990	17070	16794	37.8	35-40%	43.58	37.8	1.2	1
EOG090F06RL	scaffold_27	4972296	5051500	1209	79205	76163	34.9	30-35%	43.69	37.8	1.2	1
EOG090F0780	scaffold_27	2506655	2534799	1014	28145	27623	38.2	35-40%	43.67	37.8	1.2	1
EOG090F081P	scaffold_27	7701028	7752152	894	51125	48345	37.1	35-40%	45.55	37.8	1.2	1
EOG090F085H	scaffold_27	9754723	9769211	879	14489	13729	44.7	40-45%	38.65	37.1	1	1
EOG090F08D1	scaffold_27	732480	745025	834	12546	11826	37.1	35-40%	40.45	37.8	1.1	1
EOG090F08MY	scaffold_27	1370336	1388899	807	18564	17402	36.8	35-40%	42.97	37.8	1.1	1
EOG090F08NX	scaffold_27	4710575	4722972	798	12398	11981	38.5	35-40%	43.2	37.8	1.1	1
EOG090F08R7	scaffold_27	1356516	1364660	693	8145	8140	36.6	35-40%	44.08	37.8	1.2	1
EOG090F08UL	scaffold_27	6497464	6505498	822	8035	7931	43.5	40-45%	44.07	37.1	1.2	1
EOG090F08YA	scaffold_27	5614555	5617796	783	3242	3006	37.2	35-40%	46.6	37.8	1.2	1
EOG090F09FY	scaffold_27	564765	582541	927	17777	17514	51.3	50-55%	37.44	32.7	1.1	1
EOG090F09HJ	scaffold_27	9228071	9236355	591	8285	8082	39.8	35-40%	42.26	37.8	1.1	1
EOG090F0AA3	scaffold_27	5067130	5087295	501	20166	20006	37.4	35-40%	43.85	37.8	1.2	1
EOG090F0AA7	scaffold_27	6673089	6689474	621	16386	15174	36.2	35-40%	41.42	37.8	1.1	1
EOG090F0AQI	scaffold_27	10725362	10732558	621	7197	7162	45.1	45-50%	38.03	35.4	1.1	1
EOG090F0ATN	scaffold_27	11212801	11217459	540	4659	4308	48	45-50%	39.63	35.4	1.1	1
EOG090F0AUV	scaffold_27	5080535	5124806	438	44272	41244	36	35-40%	43.39	37.8	1.1	1
EOG090F0BGY	scaffold_27	10678372	10683373	357	5002	4610	41.8	40-45%	39.6	37.1	1.1	1
EOG090F0BHT	scaffold_27	5652058	5659104	405	7047	6075	37.1	35-40%	45.89	37.8	1.2	1
EOG090F0BQN	scaffold_27	2959543	2977907	357	18365	17899	39.6	35-40%	44.26	37.8	1.2	1
EOG090F096P	scaffold_270	184334	195315	726	10982	10789	53.3	50-55%	32.8	32.7	1	1
EOG090F0845	scaffold_271	143470	145970	837	2501	2501	48.1	45-50%	37.95	35.4	1.1	1
EOG090F062W	scaffold_272	137030	147210	1455	10181	9755	44.4	40-45%	43.35	37.1	1.2	1
EOG090F08HP	scaffold_272	15347	19150	975	3804	3800	44	40-45%	45.82	37.1	1.2	1
EOG090F02MK	scaffold_273	165735	173425	2142	7691	7470	61	60-65%	32.82	27.7	1.2	1
EOG090F03LC	scaffold_276	127453	173346	2406	45894	42009	43.4	40-45%	39.66	37.1	1.1	1
EOG090F04J9	scaffold_276	6994	10082	1503	3089	3089	42	40-45%	42.6	37.1	1.1	1
EOG090F07RE	scaffold_276	28846	79733	936	50888	44481	39.8	35-40%	43.31	37.8	1.1	1
EOG090F080S	scaffold_279	4867	13888	897	9022	7257	41.8	40-45%	39.53	37.1	1.1	1
EOG090F00J3	scaffold_28	4397252	4438707	4152	41456	37025	36.4	35-40%	41.09	37.8	1.1	1
EOG090F00YL	scaffold_28	9384642	9423234	3066	38593	36007	34.5	30-35%	42.98	37.8	1.1	1
EOG090F01IL	scaffold_28	4264950	4324811	2619	59862	53277	38.7	35-40%	41.74	37.8	1.1	1
EOG090F01XR	scaffold_28	1378017	1389933	2430	11917	11184	45.6	45-50%	40.93	35.4	1.2	1
EOG090F02QL	scaffold_28	2654602	2681211	2295	26610	25422	42.9	40-45%	42.15	37.1	1.1	1
EOG090F02VH	scaffold_28	2774931	2793720	1512	18790	17836	36.9	35-40%	42.17	37.8	1.1	1
EOG090F03IH	scaffold_28	5285134	5322463	1869	37330	35934	38.5	35-40%	43.25	37.8	1.1	1
EOG090F03OM	scaffold_28	2129414	2145659	2763	16246	15892	36.1	35-40%	42.93	37.8	1.1	1
EOG090F03YM	scaffold_28	756915	771108	1485	14194	13667	41	40-45%	41.7	37.1	1.1	1
EOG090F03YT	scaffold_28	3976744	4028045	1890	51302	49500	39.6	35-40%	43.31	37.8	1.1	1
EOG090F042W	scaffold_28	2089170	2113862	1545	24693	23572	41.3	40-45%	43.82	37.1	1.2	1
EOG090F046M	scaffold_28	6434752	6450158	1890	15407	13657	41.1	40-45%	42.35	37.1	1.1	1
EOG090F04I0	scaffold_28	2796607	2807883	1464	11277	11019	42.8	40-45%	43.42	37.1	1.2	1
EOG090F04PX	scaffold_28	4958701	4965190	1758	6490	5632	38.9	35-40%	42.63	37.8	1.1	1
EOG090F04SP	scaffold_28	3226114	3256733	1752	30620	28063	43.9	40-45%	41.83	37.1	1.1	1
EOG090F051N	scaffold_28	7090460	7118240	1098	27781	27397	38.9	35-40%	43.08	37.8	1.1	1
EOG090F052Z	scaffold_28	5799381	5804199	1221	4819	4764	38.4	35-40%	42.59	37.8	1.1	1
EOG090F05U1	scaffold_28	2032383	2084476	2121	52094	50015	39.1	35-40%	43.68	37.8	1.2	1
EOG090F06EC	scaffold_28	1661834	1674022	1272	12189	11084	37.9	35-40%	39.47	37.8	1	1
EOG090F06K9	scaffold_28	9331378	9332523	1146	1146	1113	50.9	50-55%	38.29	32.7	1.2	1
EOG090F06NA	scaffold_28	3817733	3838313	1119	20581	18973	40.6	40-45%	43.38	37.1	1.2	1
EOG090F06U2	scaffold_28	4245484	4247311	1035	1828	1735	58.7	55-60%	38.76	30.1	1.3	1
EOG090F0766	scaffold_28	7582068	7617804	1026	35737	33951	40.7	40-45%	43.43	37.1	1.2	1
EOG090F07Q3	scaffold_28	10747633	10814590	1275	66958	53523	39.9	35-40%	41.15	37.8	1.1	1
EOG090F07TR	scaffold_28	6568443	6569501	1059	1059	1059	51.1	50-55%	41.29	32.7	1.3	1
EOG090F0896	scaffold_28	2149614	2159704	1098	10091	9300	37.4	35-40%	42.08	37.8	1.1	1
EOG090F08V0	scaffold_28	7462372	7470576	588	8205	8033	43.2	40-45%	37.09	37.1	1	1
EOG090F092T	scaffold_28	1688128	1694233	702	6106	5890	44.7	40-45%	39.87	37.1	1.1	1
EOG090F09G7	scaffold_28	3929051	3967888	756	38838	37558	40.5	40-45%	42.69	37.1	1.2	1
EOG090F09KT	scaffold_28	10467077	10478207	615	11131	10876	40.7	40-45%	41.25	37.1	1.1	1
EOG090F0A3W	scaffold_28	3266521	3273357	552	6837	6541	35.3	35-40%	41.16	37.8	1.1	1
EOG090F0AQQ	scaffold_28	1310663	1325246	570	14584	14566	42.5	40-45%	41.5	37.1	1.1	1
EOG090F0B3O	scaffold_28	7135972	7193115	2817	57144	53534	41.1	40-45%	41.45	37.1	1.1	1
EOG090F0B4I	scaffold_28	5204533	5215522	459	10990	10106	35.7	35-40%	42.72	37.8	1.1	1
EOG090F0B9B	scaffold_28	3808904	3817816	486	8913	7609	44.7	40-45%	36.94	37.1	1	1
EOG090F0BHL	scaffold_28	904041	920219	882	16179	13900	38.6	35-40%	41.18	37.8	1.1	1
EOG090F0BQP	scaffold_28	8744286	8747457	399	3172	3149	42.2	40-45%	39.33	37.1	1.1	1
EOG090F0BS2	scaffold_28	7128777	7134359	498	5583	5329	40.6	40-45%	41.63	37.1	1.1	1
EOG090F0CEC	scaffold_28	803654	805067	246	1414	1412	37	35-40%	43.1	37.8	1.1	1
EOG090F08WU	scaffold_280	37094	39703	945	2610	2592	54.2	50-55%	33.98	32.7	1	1
EOG090F09AS	scaffold_280	161295	166561	825	5267	4344	50.9	50-55%	40.06	32.7	1.2	1
EOG090F02FY	scaffold_285	60188	92264	2325	32077	31784	37.4	35-40%	43.28	37.8	1.1	1
EOG090F06UG	scaffold_286	30230	51348	999	21119	20026	40	40-45%	43.47	37.1	1.2	1
EOG090F09J5	scaffold_286	114930	129520	615	14591	14038	49.1	45-50%	39.56	35.4	1.1	1
EOG090F00ZN	scaffold_29	6147275	6155986	3414	8712	8467	44.2	40-45%	41.4	37.1	1.1	1
EOG090F01CT	scaffold_29	3004968	3067936	2586	62969	51829	39.4	35-40%	43.18	37.8	1.1	1
[truncated: 2,601 more rows]
