# Supplementary material for: Olfactory receptor subgenome and expression in a highly olfactory procellariiform seabird
Source: Oxford University Press journal article supplement (doi:10.1093/genetics/iyab210), 2021-10-04
Supplement: iyab210_supplementary_table_s10.xlsx [file iyab210_supplementary_table_s10.xlsx]

## Sheet: galGal_OR_DoC_summary_good
Supplementary Table S10 Copy number ratio of OR genes in the chicken genome (Ggal6), based on the OR identification pipeline in this study.
ID	Scaffold	Start	End	Strand	Length	ACGT_length	%GC	GC_bin	Avg_DoC	GC_bin_avg_Doc	Ratio	Ratio_integer
galGal_OR_1	NC_006088.5	373166	374239	-	1074	1074	64.4	60-65%	25.09	26	1	1
galGal_OR_10	NC_006088.5	197251573	197252616	+	1044	1044	53	50-55%	18.26	28.1	0.6	1
galGal_OR_100	NC_006103.5	1501035	1501694	+	660	660	53.2	50-55%	37.91	28.1	1.3	1
galGal_OR_101	NC_006103.5	1503695	1504435	-	741	741	49.9	45-50%	13.7	28.9	0.5	1
galGal_OR_102	NC_006103.5	1538979	1540036	+	1058	1058	46.5	45-50%	13.63	28.9	0.5	1
galGal_OR_103	NC_006103.5	1551590	1552154	-	565	565	56.5	55-60%	19.3	27.2	0.7	1
galGal_OR_104	NC_006103.5	1558278	1559195	+	918	918	55.8	55-60%	23.84	27.2	0.9	1
galGal_OR_105	NC_006103.5	1561149	1562195	-	1047	1047	53.4	50-55%	10.61	28.1	0.4	0
galGal_OR_106	NC_006103.5	1611726	1612781	+	1056	1056	46.8	45-50%	9.49	28.9	0.3	0
galGal_OR_107	NC_006103.5	1624719	1625153	-	435	435	57	55-60%	0	27.2	0	0
galGal_OR_108	NC_006103.5	1631235	1631590	+	356	356	59.3	55-60%	0	27.2	0	0
galGal_OR_109	NC_006103.5	1634098	1635207	-	1110	1110	51.7	50-55%	14.76	28.1	0.5	1
galGal_OR_11	NC_006088.5	197261378	197262421	+	1044	1044	52.7	50-55%	20.54	28.1	0.7	1
galGal_OR_110	NC_006103.5	1687363	1688418	+	1056	1056	46.9	45-50%	1.58	28.9	0.1	0
galGal_OR_111	NC_006103.5	1706602	1707249	+	648	648	50.9	50-55%	28.12	28.1	1	1
galGal_OR_112	NC_006103.5	1785561	1786622	-	1062	1062	51	50-55%	61.32	28.1	2.2	2
galGal_OR_113	NC_006104.5	855813	856895	-	1083	1083	54.9	50-55%	27.11	28.1	1	1
galGal_OR_114	NC_006105.5	67334	68135	+	802	802	51.6	50-55%	26.06	28.1	0.9	1
galGal_OR_115	NC_006111.5	6284844	6285744	-	901	901	49.2	45-50%	5.62	28.9	0.2	0
galGal_OR_116	NC_006111.5	6304405	6305304	+	900	900	49.2	45-50%	0	28.9	0	0
galGal_OR_117	NC_006112.4	636546	636863	-	318	318	47.8	45-50%	28.95	28.9	1	1
galGal_OR_118	NC_006114.5	2201606	2202652	-	1047	1047	43.9	40-45%	24.91	29.7	0.8	1
galGal_OR_119	NC_006114.5	2206286	2207242	-	957	957	42	40-45%	31.02	29.7	1	1
galGal_OR_12	NC_006088.5	197267408	197268493	-	1086	1086	53.1	50-55%	27.48	28.1	1	1
galGal_OR_120	NC_006114.5	2213416	2214483	-	1068	1068	45.3	45-50%	26.97	28.9	0.9	1
galGal_OR_121	NC_008465.4	141660	142778	-	1119	1119	51.4	50-55%	21.53	28.1	0.8	1
galGal_OR_122	NC_008465.4	151677	152861	-	1185	1185	51.1	50-55%	25.1	28.1	0.9	1
galGal_OR_123	NC_008465.4	160297	161340	+	1044	1044	54	50-55%	24.53	28.1	0.9	1
galGal_OR_124	NC_008465.4	167450	168451	+	1002	1002	55.9	55-60%	23.89	27.2	0.9	1
galGal_OR_125	NC_008465.4	172952	174031	+	1080	1080	52.9	50-55%	25.42	28.1	0.9	1
galGal_OR_126	NC_008465.4	178523	179602	+	1080	1080	53.9	50-55%	24.17	28.1	0.9	1
galGal_OR_127	NC_008465.4	185360	186466	-	1107	1107	53.3	50-55%	23.04	28.1	0.8	1
galGal_OR_128	NC_008465.4	197408	198457	-	1050	1050	53.6	50-55%	20.28	28.1	0.7	1
galGal_OR_129	NC_008465.4	207374	208513	-	1140	1140	52	50-55%	23.12	28.1	0.8	1
galGal_OR_13	NC_006088.5	197298531	197299068	+	538	538	56.1	55-60%	29.17	27.2	1.1	1
galGal_OR_130	NC_008465.4	216641	217813	+	1173	1173	51.1	50-55%	22.76	28.1	0.8	1
galGal_OR_131	NC_008465.4	224858	225922	-	1065	1065	53.9	50-55%	25.82	28.1	0.9	1
galGal_OR_132	NC_008465.4	240849	241889	-	1041	1041	53.7	50-55%	24.01	28.1	0.9	1
galGal_OR_133	NC_008465.4	249872	250951	+	1080	1080	53.5	50-55%	6.88	28.1	0.2	0
galGal_OR_134	NC_008465.4	256251	256943	-	693	693	50.5	50-55%	24.1	28.1	0.9	1
galGal_OR_135	NC_008465.4	259418	260497	-	1080	1080	52.9	50-55%	13.6	28.1	0.5	1
galGal_OR_136	NC_008465.4	267803	268912	+	1110	1110	52.7	50-55%	29.08	28.1	1	1
galGal_OR_137	NC_008465.4	274770	275849	-	1080	1080	52.5	50-55%	21.49	28.1	0.8	1
galGal_OR_138	NC_008465.4	284302	285429	-	1128	1128	52.3	50-55%	17.67	28.1	0.6	1
galGal_OR_139	NC_008465.4	295125	296216	+	1092	1092	52.8	50-55%	21.95	28.1	0.8	1
galGal_OR_14	NC_006088.5	197299174	197299558	+	385	385	51.9	50-55%	29.51	28.1	1.1	1
galGal_OR_140	NC_008465.4	302034	302543	-	510	510	46.1	45-50%	9.03	28.9	0.3	0
galGal_OR_141	NC_008465.4	303582	304595	-	1014	1014	53.9	50-55%	28.68	28.1	1	1
galGal_OR_142	NC_008465.4	313663	314682	+	1020	1020	54.5	50-55%	24.71	28.1	0.9	1
galGal_OR_143	NC_008465.4	320802	321875	-	1074	1074	54.6	50-55%	19.84	28.1	0.7	1
galGal_OR_144	NC_008465.4	336717	337799	+	1083	1083	52.4	50-55%	29.42	28.1	1	1
galGal_OR_145	NC_008465.4	340172	340950	+	779	779	49	45-50%	25.93	28.9	0.9	1
galGal_OR_146	NC_008465.4	346980	348044	+	1065	1065	52.5	50-55%	14.73	28.1	0.5	1
galGal_OR_147	NC_008465.4	352433	353493	+	1061	1061	53.8	50-55%	1.84	28.1	0.1	0
galGal_OR_148	NC_008465.4	360205	360666	-	462	462	48.9	45-50%	0.87	28.9	0	0
galGal_OR_149	NC_008465.4	361714	362772	-	1059	1059	52.8	50-55%	19.3	28.1	0.7	1
galGal_OR_15	NC_006088.5	197303124	197303871	+	748	748	54.5	50-55%	24.28	28.1	0.9	1
galGal_OR_150	NC_008465.4	371173	372240	-	1068	1068	52.1	50-55%	23.74	28.1	0.8	1
galGal_OR_151	NC_008465.4	380516	381547	+	1032	1032	53.7	50-55%	20.55	28.1	0.7	1
galGal_OR_152	NC_008465.4	385349	386374	-	1026	1026	55.2	55-60%	20.43	27.2	0.8	1
galGal_OR_153	NC_008465.4	394606	395670	+	1065	1065	52.6	50-55%	18.89	28.1	0.7	1
galGal_OR_154	NC_008465.4	400660	401103	-	444	444	52	50-55%	23.05	28.1	0.8	1
galGal_OR_155	NC_008465.4	402071	403153	-	1083	1083	53.2	50-55%	26.05	28.1	0.9	1
galGal_OR_156	NC_008465.4	411989	413161	+	1173	1173	51.6	50-55%	23.38	28.1	0.8	1
galGal_OR_157	NC_008465.4	420985	422018	+	1034	1034	53	50-55%	1.28	28.1	0	0
galGal_OR_158	NC_008465.4	425066	426139	-	1074	1074	54.2	50-55%	27.11	28.1	1	1
galGal_OR_159	NC_008465.4	435867	436955	+	1089	1089	54.3	50-55%	24.15	28.1	0.9	1
galGal_OR_16	NC_006088.5	197327574	197328617	+	1044	1044	52.4	50-55%	29.78	28.1	1.1	1
galGal_OR_160	NC_008465.4	443833	444876	-	1044	1044	54	50-55%	26.64	28.1	0.9	1
galGal_OR_161	NC_008465.4	453199	454239	+	1041	1041	54	50-55%	28.17	28.1	1	1
galGal_OR_162	NC_008465.4	460052	460534	-	483	483	48	45-50%	27	28.9	0.9	1
galGal_OR_163	NC_008465.4	461567	462605	-	1039	1039	53.4	50-55%	13.39	28.1	0.5	1
galGal_OR_164	NC_008465.4	470484	471572	+	1089	1089	52.6	50-55%	7.13	28.1	0.3	0
galGal_OR_165	NC_008465.4	480298	481352	+	1055	1055	53	50-55%	15.41	28.1	0.5	1
galGal_OR_166	NC_008465.4	488942	489985	-	1044	1044	53.4	50-55%	28.23	28.1	1	1
galGal_OR_167	NC_008465.4	498992	499999	+	1008	1008	55.2	55-60%	16.05	27.2	0.6	1
galGal_OR_168	NC_008465.4	505799	506908	-	1110	1110	51.9	50-55%	25.29	28.1	0.9	1
galGal_OR_169	NC_008465.4	514055	515176	+	1122	1122	51.7	50-55%	25.29	28.1	0.9	1
galGal_OR_17	NC_006088.5	197338401	197339588	-	1188	1188	58.3	55-60%	30.18	27.2	1.1	1
galGal_OR_170	NC_008465.4	521070	522143	-	1074	1074	51.5	50-55%	25.17	28.1	0.9	1
galGal_OR_171	NC_008465.4	532260	533363	+	1104	1104	52.5	50-55%	19.6	28.1	0.7	1
galGal_OR_172	NC_008465.4	535776	536551	+	776	776	49.4	45-50%	22.73	28.9	0.8	1
galGal_OR_173	NC_008465.4	541675	542703	-	1029	1029	54.2	50-55%	24.2	28.1	0.9	1
galGal_OR_174	NC_008465.4	551713	552762	+	1050	1050	54.2	50-55%	25.33	28.1	0.9	1
galGal_OR_175	NC_008465.4	562158	562667	-	510	510	46.3	45-50%	15.35	28.9	0.5	1
galGal_OR_176	NC_008465.4	563706	564752	-	1047	1047	54.5	50-55%	23.17	28.1	0.8	1
galGal_OR_177	NC_008465.4	571950	572987	-	1038	1038	54.4	50-55%	3.42	28.1	0.1	0
galGal_OR_178	NC_008465.4	580207	581334	+	1128	1128	51.6	50-55%	28.57	28.1	1	1
galGal_OR_179	NC_008465.4	589862	590896	-	1035	1035	53.1	50-55%	25.81	28.1	0.9	1
galGal_OR_18	NC_006088.5	197352934	197354040	-	1107	1107	61.6	60-65%	25.45	26	1	1
galGal_OR_180	NC_008465.4	595969	597018	-	1050	1050	52.9	50-55%	26.74	28.1	1	1
galGal_OR_181	NC_008465.4	602501	603529	-	1029	1029	53.9	50-55%	28.02	28.1	1	1
galGal_OR_182	NC_008465.4	612481	613494	+	1014	1014	54.9	50-55%	22.01	28.1	0.8	1
galGal_OR_183	NC_008465.4	617254	618249	-	996	996	50.4	50-55%	24.83	28.1	0.9	1
galGal_OR_184	NC_008465.4	620144	621205	-	1062	1062	52.1	50-55%	25.57	28.1	0.9	1
galGal_OR_185	NC_008465.4	630183	630913	+	731	731	52.3	50-55%	18.13	28.1	0.6	1
galGal_OR_186	NC_008465.4	638585	639676	-	1092	1092	52.5	50-55%	28.27	28.1	1	1
galGal_OR_187	NC_008465.4	648375	649427	+	1053	1053	53.4	50-55%	24.37	28.1	0.9	1
galGal_OR_188	NC_008465.4	654219	654785	-	567	567	46.6	45-50%	27.08	28.9	0.9	1
galGal_OR_189	NC_008465.4	655764	656831	-	1068	1068	53.1	50-55%	25.29	28.1	0.9	1
galGal_OR_190	NC_008465.4	663673	664752	+	1080	1080	53.3	50-55%	27.65	28.1	1	1
galGal_OR_191	NC_008465.4	671609	672640	-	1032	1032	54	50-55%	11.07	28.1	0.4	0
galGal_OR_192	NC_008465.4	679863	680900	+	1038	1038	53.4	50-55%	7.83	28.1	0.3	0
galGal_OR_193	NC_008465.4	683330	684091	+	762	762	51.2	50-55%	40.14	28.1	1.4	1
galGal_OR_194	NC_008465.4	691363	692571	-	1209	1209	50.3	50-55%	24.29	28.1	0.9	1
galGal_OR_195	NC_008465.4	700996	702081	+	1086	1086	54.9	50-55%	20.41	28.1	0.7	1
galGal_OR_196	NC_008465.4	707906	708937	-	1032	1032	54.1	50-55%	6.3	28.1	0.2	0
galGal_OR_197	NC_008465.4	713340	714389	-	1050	1050	53.1	50-55%	18.84	28.1	0.7	1
galGal_OR_198	NC_008465.4	723282	724382	-	1101	1101	53.2	50-55%	20.96	28.1	0.7	1
galGal_OR_199	NC_008465.4	730542	731687	-	1146	1146	51.3	50-55%	27.81	28.1	1	1
galGal_OR_2	NC_006088.5	78151615	78152694	+	1080	1080	50.1	50-55%	24.09	28.1	0.9	1
galGal_OR_200	NC_008465.4	736917	737984	-	1068	1068	52.2	50-55%	28.24	28.1	1	1
galGal_OR_201	NC_008465.4	746441	747496	+	1056	1056	52.9	50-55%	19.34	28.1	0.7	1
galGal_OR_202	NC_008465.4	754973	756106	-	1134	1134	52.2	50-55%	21.88	28.1	0.8	1
galGal_OR_203	NC_008465.4	765152	766243	+	1092	1092	53.6	50-55%	21.83	28.1	0.8	1
galGal_OR_204	NC_008465.4	771826	772884	-	1059	1059	53.7	50-55%	20.04	28.1	0.7	1
galGal_OR_205	NC_008465.4	782349	783485	+	1137	1137	52.8	50-55%	29.62	28.1	1.1	1
galGal_OR_206	NC_008465.4	786904	787938	-	1035	1035	53	50-55%	23.67	28.1	0.8	1
galGal_OR_207	NC_008465.4	796013	797089	+	1077	1077	53	50-55%	22.54	28.1	0.8	1
galGal_OR_208	NC_008465.4	805376	806395	-	1020	1020	54.2	50-55%	21.45	28.1	0.8	1
galGal_OR_209	NC_008465.4	814154	815278	+	1125	1125	52.1	50-55%	25.41	28.1	0.9	1
galGal_OR_21	NC_006092.5	88898	89880	-	983	983	47.2	45-50%	32.96	28.9	1.1	1
galGal_OR_210	NC_008465.4	820223	821308	-	1086	1086	53.9	50-55%	22.72	28.1	0.8	1
galGal_OR_211	NC_008465.4	829113	830201	+	1089	1089	52.8	50-55%	14.51	28.1	0.5	1
galGal_OR_212	NC_008465.4	835040	836107	-	1068	1068	53.6	50-55%	17.96	28.1	0.6	1
galGal_OR_213	NC_008465.4	844410	845507	+	1098	1098	53.9	50-55%	17.81	28.1	0.6	1
galGal_OR_214	NC_008465.4	856989	858041	-	1053	1053	52.6	50-55%	22.17	28.1	0.8	1
galGal_OR_215	NC_008465.4	863086	864126	-	1041	1041	52.6	50-55%	26.6	28.1	0.9	1
galGal_OR_216	NC_008465.4	873315	874310	+	996	996	53.4	50-55%	21.84	28.1	0.8	1
galGal_OR_217	NC_008465.4	875358	875819	+	462	462	48.9	45-50%	1.95	28.9	0.1	0
galGal_OR_218	NC_008465.4	879775	880803	-	1029	1029	54.1	50-55%	0	28.1	0	0
galGal_OR_219	NC_008465.4	888564	889598	+	1035	1035	53.5	50-55%	27.74	28.1	1	1
galGal_OR_22	NC_006092.5	94903	95304	-	402	402	43.5	40-45%	33.64	29.7	1.1	1
galGal_OR_220	NC_008465.4	890625	891097	+	473	473	49.5	45-50%	27.1	28.9	0.9	1
galGal_OR_221	NC_008465.4	897372	898463	-	1092	1092	53.3	50-55%	32.84	28.1	1.2	1
galGal_OR_222	NC_008465.4	906806	907894	+	1089	1089	53.4	50-55%	24.12	28.1	0.9	1
galGal_OR_223	NC_008465.4	913674	914168	-	495	495	48.7	45-50%	29.39	28.9	1	1
galGal_OR_224	NC_008465.4	915197	916219	-	1023	1023	53.7	50-55%	18.88	28.1	0.7	1
galGal_OR_225	NC_008465.4	924845	926047	+	1203	1203	50.8	50-55%	0.02	28.1	0	0
galGal_OR_226	NC_008465.4	933114	934142	+	1029	1029	53.7	50-55%	21.79	28.1	0.8	1
galGal_OR_227	NC_008465.4	940126	941220	-	1095	1095	53.4	50-55%	24.14	28.1	0.9	1
galGal_OR_228	NC_008465.4	947838	948953	+	1116	1116	52.1	50-55%	21.93	28.1	0.8	1
galGal_OR_229	NC_008465.4	952583	953704	-	1122	1122	52.7	50-55%	28.95	28.1	1	1
galGal_OR_23	NC_006092.5	98134	99115	-	982	982	47.6	45-50%	25.87	28.9	0.9	1
galGal_OR_230	NC_008465.4	962947	964023	+	1077	1077	53.7	50-55%	21.46	28.1	0.8	1
galGal_OR_231	NC_008465.4	967698	968783	-	1086	1086	52.7	50-55%	25.27	28.1	0.9	1
galGal_OR_232	NC_008465.4	978444	979520	+	1077	1077	53.1	50-55%	28.83	28.1	1	1
galGal_OR_233	NC_008465.4	986340	987389	-	1050	1050	54.4	50-55%	28.26	28.1	1	1
galGal_OR_234	NC_008465.4	995193	996284	+	1092	1092	52.9	50-55%	25.03	28.1	0.9	1
galGal_OR_235	NC_008465.4	1000650	1001671	-	1022	1022	55	55-60%	12.93	27.2	0.5	1
galGal_OR_236	NC_008465.4	1009538	1010299	+	762	762	47.4	45-50%	25.61	28.9	0.9	1
galGal_OR_237	NC_008465.4	1014012	1015085	-	1074	1074	53.6	50-55%	5.82	28.1	0.2	0
galGal_OR_238	NC_008465.4	1020112	1021140	-	1029	1029	54.1	50-55%	23.42	28.1	0.8	1
galGal_OR_239	NC_008465.4	1028168	1029184	+	1017	1017	54.1	50-55%	20.85	28.1	0.7	1
galGal_OR_24	NC_006092.5	491438	492483	+	1046	1046	51.6	50-55%	24.03	28.1	0.9	1
galGal_OR_240	NC_008465.4	1030236	1030700	+	465	465	49.2	45-50%	30.26	28.9	1	1
galGal_OR_241	NC_008465.4	1034697	1035767	-	1071	1071	53.7	50-55%	0.7	28.1	0	0
galGal_OR_242	NC_008465.4	1045974	1047050	-	1077	1077	53.8	50-55%	4.1	28.1	0.1	0
galGal_OR_243	NC_008465.4	1055185	1056258	+	1074	1074	54	50-55%	25.08	28.1	0.9	1
galGal_OR_244	NC_008465.4	1063430	1064473	-	1044	1044	53.6	50-55%	20.65	28.1	0.7	1
galGal_OR_245	NC_008465.4	1069000	1070103	-	1104	1104	53	50-55%	18.33	28.1	0.7	1
galGal_OR_246	NC_008465.4	1078997	1080031	+	1035	1035	52.4	50-55%	24.06	28.1	0.9	1
galGal_OR_247	NC_008465.4	1090176	1091273	-	1098	1098	53.5	50-55%	25.98	28.1	0.9	1
galGal_OR_248	NC_008465.4	1096663	1097679	+	1017	1017	53.9	50-55%	7.31	28.1	0.3	0
galGal_OR_249	NC_008465.4	1098706	1099209	+	504	504	47	45-50%	23.81	28.9	0.8	1
galGal_OR_25	NC_006092.5	497446	498597	-	1152	1152	53.1	50-55%	28.15	28.1	1	1
galGal_OR_250	NC_008465.4	1103689	1104741	-	1053	1053	54.1	50-55%	13.01	28.1	0.5	1
galGal_OR_251	NC_008465.4	1113135	1114244	+	1110	1110	53.5	50-55%	50.26	28.1	1.8	2
galGal_OR_252	NC_008465.4	1121591	1122610	-	1020	1020	54.5	50-55%	30	28.1	1.1	1
galGal_OR_253	NC_008465.4	1131103	1132152	+	1050	1050	54	50-55%	10.85	28.1	0.4	0
galGal_OR_254	NC_008465.4	1140894	1141925	-	1032	1032	53.6	50-55%	41.69	28.1	1.5	2
galGal_OR_255	NC_008465.4	1149941	1151023	+	1083	1083	52.8	50-55%	51.93	28.1	1.8	2
galGal_OR_256	NC_008465.4	1157971	1159149	-	1179	1179	50.9	50-55%	8.78	28.1	0.3	0
galGal_OR_257	NC_008465.4	1167531	1168592	+	1062	1062	53.5	50-55%	27.29	28.1	1	1
galGal_OR_258	NC_008465.4	1176435	1176956	-	522	522	46	45-50%	12.68	28.9	0.4	0
galGal_OR_259	NC_008465.4	1177879	1179018	-	1140	1140	51.6	50-55%	26.29	28.1	0.9	1
galGal_OR_26	NC_006092.5	503032	503824	+	793	793	46.8	45-50%	27.17	28.9	0.9	1
galGal_OR_260	NC_008465.4	1188942	1189994	+	1053	1053	53.4	50-55%	28.05	28.1	1	1
galGal_OR_261	NC_008465.4	1193888	1194265	-	378	378	43.9	40-45%	23.62	29.7	0.8	1
galGal_OR_262	NC_008465.4	1195333	1196349	-	1017	1017	54.7	50-55%	21.32	28.1	0.8	1
galGal_OR_263	NC_008465.4	1202027	1203061	+	1035	1035	53.9	50-55%	26.06	28.1	0.9	1
galGal_OR_264	NC_008465.4	1214218	1215255	+	1038	1038	54.1	50-55%	16.44	28.1	0.6	1
galGal_OR_265	NC_008465.4	1219188	1220243	+	1056	1056	53.7	50-55%	18.23	28.1	0.6	1
galGal_OR_266	NC_008465.4	1226594	1227196	-	603	603	51.9	50-55%	23.57	28.1	0.8	1
galGal_OR_267	NC_008465.4	1227510	1228010	+	501	501	48.9	45-50%	31.41	28.9	1.1	1
galGal_OR_268	NC_008465.4	1234340	1235389	-	1050	1050	54.7	50-55%	26.05	28.1	0.9	1
galGal_OR_269	NC_008465.4	1245509	1246711	+	1203	1203	50.8	50-55%	1.76	28.1	0.1	0
galGal_OR_27	NC_006092.5	505704	506789	-	1086	1086	51.8	50-55%	32.44	28.1	1.2	1
galGal_OR_270	NC_008465.4	1253733	1254446	+	714	714	55.5	55-60%	30.48	27.2	1.1	1
galGal_OR_271	NC_008465.4	1258199	1259257	-	1059	1059	53.3	50-55%	23.88	28.1	0.8	1
galGal_OR_272	NC_008465.4	1268068	1268481	-	414	414	50.7	50-55%	26.34	28.1	0.9	1
galGal_OR_273	NC_008465.4	1269463	1270530	-	1068	1068	52.2	50-55%	15.67	28.1	0.6	1
galGal_OR_274	NC_008465.4	1276704	1277741	-	1038	1038	54.5	50-55%	3.07	28.1	0.1	0
galGal_OR_275	NC_008465.4	1284224	1285279	+	1056	1056	53.8	50-55%	25.06	28.1	0.9	1
galGal_OR_276	NC_008465.4	1292543	1293246	+	704	704	50.4	50-55%	23.86	28.1	0.8	1
galGal_OR_277	NC_008465.4	1298546	1299634	-	1089	1089	52.7	50-55%	22.53	28.1	0.8	1
galGal_OR_278	NC_008465.4	1308144	1309151	+	1008	1008	55.4	55-60%	21.51	27.2	0.8	1
galGal_OR_279	NC_008465.4	1317235	1318245	-	1011	1011	53.5	50-55%	24.71	28.1	0.9	1
galGal_OR_28	NC_006092.5	509333	510430	-	1098	1098	54.3	50-55%	26.51	28.1	0.9	1
galGal_OR_280	NC_008465.4	1332175	1333233	-	1059	1059	53.2	50-55%	16.88	28.1	0.6	1
galGal_OR_281	NC_008465.4	1337131	1338237	-	1107	1107	52.8	50-55%	22.08	28.1	0.8	1
galGal_OR_282	NC_008465.4	1345932	1347029	+	1098	1098	54.2	50-55%	24.42	28.1	0.9	1
galGal_OR_283	NC_008465.4	1352941	1353939	+	999	999	55.5	55-60%	17.34	27.2	0.6	1
galGal_OR_284	NC_008465.4	1361162	1362232	-	1071	1071	53.9	50-55%	13.62	28.1	0.5	1
galGal_OR_285	NC_008465.4	1371983	1373083	+	1101	1101	54	50-55%	24.07	28.1	0.9	1
galGal_OR_286	NC_008465.4	1377365	1378444	+	1080	1080	54.2	50-55%	11.91	28.1	0.4	0
galGal_OR_287	NC_008465.4	1380727	1381743	+	1017	1017	54.1	50-55%	24.49	28.1	0.9	1
galGal_OR_288	NC_008465.4	1388027	1389088	+	1062	1062	52.4	50-55%	20.96	28.1	0.7	1
galGal_OR_289	NC_008465.4	1393546	1394112	-	567	567	48.7	45-50%	23.14	28.9	0.8	1
galGal_OR_29	NC_006092.5	514310	515455	+	1146	1146	57	55-60%	25.66	27.2	0.9	1
galGal_OR_290	NC_008465.4	1395091	1396077	-	987	987	54.7	50-55%	21.3	28.1	0.8	1
galGal_OR_291	NC_008465.4	1402101	1403135	-	1035	1035	54.1	50-55%	14.1	28.1	0.5	1
galGal_OR_292	NC_008465.4	1411171	1412175	-	1005	1005	53.1	50-55%	25.98	28.1	0.9	1
galGal_OR_293	NC_008465.4	1420804	1421820	+	1017	1017	53.5	50-55%	17.67	28.1	0.6	1
galGal_OR_294	NC_008465.4	1427092	1427604	-	513	513	47.8	45-50%	22.47	28.9	0.8	1
galGal_OR_295	NC_008465.4	1428584	1429618	-	1035	1035	53.1	50-55%	20.66	28.1	0.7	1
galGal_OR_296	NC_008465.4	1438107	1439222	+	1116	1116	51.5	50-55%	20.07	28.1	0.7	1
galGal_OR_297	NC_008465.4	1444384	1445428	+	1045	1045	54.4	50-55%	22.96	28.1	0.8	1
galGal_OR_298	NC_008465.4	1451476	1452546	-	1071	1071	52.1	50-55%	23.8	28.1	0.8	1
galGal_OR_299	NC_008465.4	1461378	1462550	-	1173	1173	51.2	50-55%	2.86	28.1	0.1	0
galGal_OR_3	NC_006088.5	197186310	197187407	-	1098	1098	57	55-60%	25.58	27.2	0.9	1
galGal_OR_30	NC_006092.5	523815	524497	-	683	683	49.2	45-50%	24.34	28.9	0.8	1
galGal_OR_300	NC_008465.4	1472170	1473264	+	1095	1095	52.9	50-55%	20.7	28.1	0.7	1
galGal_OR_301	NC_008465.4	1481310	1482383	-	1074	1074	54.7	50-55%	27.69	28.1	1	1
galGal_OR_302	NC_008465.4	1490830	1491966	+	1137	1137	50.5	50-55%	26.34	28.1	0.9	1
galGal_OR_303	NC_008465.4	1497129	1497998	-	870	870	47.7	45-50%	29.15	28.9	1	1
galGal_OR_304	NC_008465.4	1499128	1500258	-	1131	1131	52.1	50-55%	9.83	28.1	0.3	0
galGal_OR_305	NC_008465.4	1509969	1511039	+	1071	1071	52.9	50-55%	25.31	28.1	0.9	1
galGal_OR_306	NC_008465.4	1519157	1520188	+	1032	1032	54.7	50-55%	27.05	28.1	1	1
galGal_OR_307	NC_008465.4	1529341	1530543	+	1203	1203	50.9	50-55%	2.14	28.1	0.1	0
galGal_OR_308	NC_008465.4	1537349	1538048	+	700	700	53.1	50-55%	23.51	28.1	0.8	1
galGal_OR_309	NC_008465.4	1545763	1546881	-	1119	1119	53	50-55%	22.82	28.1	0.8	1
galGal_OR_31	NC_006092.5	1249842	1250960	-	1119	1119	48.8	45-50%	15.55	28.9	0.5	1
galGal_OR_310	NC_008465.4	1554214	1555305	+	1092	1092	52.8	50-55%	20.32	28.1	0.7	1
galGal_OR_311	NC_008465.4	1562484	1563533	-	1050	1050	54.6	50-55%	26.84	28.1	1	1
galGal_OR_312	NC_008465.4	1569577	1570653	-	1077	1077	54.7	50-55%	25.04	28.1	0.9	1
galGal_OR_313	NC_008465.4	1578235	1579314	+	1080	1080	53.1	50-55%	16.3	28.1	0.6	1
galGal_OR_314	NC_008465.4	1581778	1582503	+	726	726	52.8	50-55%	22.13	28.1	0.8	1
galGal_OR_315	NC_008465.4	1588329	1589351	-	1023	1023	54.9	50-55%	12.8	28.1	0.5	1
galGal_OR_316	NC_008465.4	1597424	1598494	+	1071	1071	51.1	50-55%	11.29	28.1	0.4	0
galGal_OR_317	NC_008465.4	1607841	1608881	-	1041	1041	53.9	50-55%	21.2	28.1	0.8	1
galGal_OR_318	NC_008465.4	1617690	1618778	+	1089	1089	52.9	50-55%	20.56	28.1	0.7	1
galGal_OR_319	NC_008465.4	1623640	1624635	-	996	996	55.8	55-60%	19.16	27.2	0.7	1
galGal_OR_32	NC_006092.5	1252693	1252953	-	261	261	41	40-45%	30.09	29.7	1	1
galGal_OR_320	NC_008465.4	1633274	1634365	+	1092	1092	54.4	50-55%	26.48	28.1	0.9	1
galGal_OR_321	NC_008465.4	1639389	1640492	-	1104	1104	54	50-55%	22.53	28.1	0.8	1
galGal_OR_322	NC_008465.4	1648504	1649551	+	1048	1048	53.9	50-55%	0	28.1	0	0
galGal_OR_323	NC_008465.4	1656762	1657502	-	741	741	49.7	45-50%	23.76	28.9	0.8	1
galGal_OR_324	NC_008465.4	1659443	1660519	-	1077	1077	52.7	50-55%	21.2	28.1	0.8	1
galGal_OR_325	NC_008465.4	1666741	1667820	+	1080	1080	53.8	50-55%	7.12	28.1	0.3	0
galGal_OR_326	NC_008465.4	1673105	1673773	-	669	669	49.9	45-50%	18.9	28.9	0.7	1
galGal_OR_327	NC_008465.4	1675765	1676811	-	1047	1047	53.6	50-55%	28.5	28.1	1	1
galGal_OR_328	NC_008465.4	1686678	1687721	+	1044	1044	54.1	50-55%	25.33	28.1	0.9	1
galGal_OR_329	NC_008465.4	1693089	1694195	-	1107	1107	52.4	50-55%	26.66	28.1	0.9	1
galGal_OR_33	NC_006092.5	1254676	1255731	-	1056	1056	44.2	40-45%	27.81	29.7	0.9	1
galGal_OR_330	NC_008465.4	1699404	1700483	-	1080	1080	52.7	50-55%	21.03	28.1	0.7	1
galGal_OR_331	NC_008465.4	1708068	1709141	+	1074	1074	54.4	50-55%	24.06	28.1	0.9	1
galGal_OR_332	NC_008465.4	1712622	1713656	-	1035	1035	53.6	50-55%	25.15	28.1	0.9	1
galGal_OR_333	NC_008465.4	1721594	1722655	+	1062	1062	53.8	50-55%	26.53	28.1	0.9	1
galGal_OR_334	NC_008465.4	1726262	1727290	-	1029	1029	51.5	50-55%	8.35	28.1	0.3	0
galGal_OR_335	NC_008465.4	1732636	1733691	-	1056	1056	54.1	50-55%	10.67	28.1	0.4	0
galGal_OR_336	NC_008465.4	1741865	1742959	-	1095	1095	53.7	50-55%	18.01	28.1	0.6	1
galGal_OR_337	NC_008465.4	1747716	1748795	-	1080	1080	52	50-55%	19.76	28.1	0.7	1
galGal_OR_338	NC_008465.4	1757399	1758492	+	1094	1094	53.3	50-55%	24.68	28.1	0.9	1
galGal_OR_339	NC_008465.4	1765224	1766282	-	1059	1059	53.7	50-55%	6.2	28.1	0.2	0
galGal_OR_34	NC_006092.5	1260079	1260753	+	675	675	39.7	35-40%	36.66	30.4	1.2	1
galGal_OR_340	NC_008465.4	1775470	1776543	+	1074	1074	52.3	50-55%	23.49	28.1	0.8	1
galGal_OR_341	NC_008465.4	1780112	1781218	+	1107	1107	52.7	50-55%	26.13	28.1	0.9	1
galGal_OR_342	NC_008465.4	1786371	1787525	-	1155	1155	51	50-55%	21.43	28.1	0.8	1
galGal_OR_343	NC_008465.4	1795780	1796895	+	1116	1116	51.1	50-55%	21.06	28.1	0.7	1
galGal_OR_344	NC_008465.4	1802056	1803165	+	1110	1110	50.8	50-55%	27.04	28.1	1	1
galGal_OR_345	NC_008465.4	1809999	1811051	-	1053	1053	50.7	50-55%	26.04	28.1	0.9	1
galGal_OR_346	NC_008465.4	1817887	1818960	+	1074	1074	53.4	50-55%	9.06	28.1	0.3	0
galGal_OR_347	NC_008465.4	1823982	1825085	-	1104	1104	53.4	50-55%	13.69	28.1	0.5	1
galGal_OR_348	NC_008465.4	1833252	1834364	+	1113	1113	53.1	50-55%	21.99	28.1	0.8	1
galGal_OR_349	NC_008465.4	1839422	1840465	+	1044	1044	54.7	50-55%	22	28.1	0.8	1
galGal_OR_35	NC_006092.5	1263025	1264200	+	1176	1176	47.8	45-50%	12.96	28.9	0.4	0
galGal_OR_350	NC_008465.4	1846090	1847214	-	1125	1125	51.6	50-55%	24.55	28.1	0.9	1
galGal_OR_351	NC_008465.4	1852387	1853442	-	1056	1056	53.9	50-55%	11.87	28.1	0.4	0
galGal_OR_352	NC_008465.4	1861528	1862583	-	1056	1056	54.6	50-55%	19.27	28.1	0.7	1
galGal_OR_353	NC_008465.4	1866934	1868007	-	1074	1074	52.8	50-55%	23.88	28.1	0.8	1
galGal_OR_354	NC_008465.4	1875559	1876689	-	1131	1131	51.9	50-55%	13.92	28.1	0.5	1
galGal_OR_355	NC_008465.4	1885567	1886586	+	1020	1020	54.2	50-55%	24.94	28.1	0.9	1
galGal_OR_356	NC_008465.4	1891080	1891547	-	468	468	50.2	50-55%	29.2	28.1	1	1
galGal_OR_357	NC_008465.4	1892596	1893618	-	1023	1023	53.6	50-55%	11.71	28.1	0.4	0
galGal_OR_358	NC_008465.4	1902503	1903585	+	1083	1083	53.1	50-55%	8.52	28.1	0.3	0
galGal_OR_359	NC_008465.4	1908870	1909886	+	1017	1017	54.1	50-55%	26.96	28.1	1	1
galGal_OR_36	NC_006092.5	1267835	1268881	+	1047	1047	44.3	40-45%	28.69	29.7	1	1
galGal_OR_360	NC_008465.4	1915861	1916903	-	1043	1043	54.2	50-55%	23.1	28.1	0.8	1
galGal_OR_361	NC_008465.4	1926108	1927247	+	1140	1140	51.3	50-55%	25.61	28.1	0.9	1
galGal_OR_362	NC_008465.4	1934711	1935757	-	1047	1047	55.2	55-60%	22.81	27.2	0.8	1
galGal_OR_363	NC_008465.4	1943255	1944385	-	1131	1131	51.9	50-55%	26.16	28.1	0.9	1
galGal_OR_364	NC_008465.4	1953296	1954375	+	1080	1080	54	50-55%	13.78	28.1	0.5	1
galGal_OR_365	NC_008465.4	1961519	1962625	-	1107	1107	51.7	50-55%	27.34	28.1	1	1
galGal_OR_366	NC_008465.4	1970212	1971306	+	1095	1095	52.1	50-55%	30.17	28.1	1.1	1
galGal_OR_367	NC_008465.4	1978575	1979672	-	1098	1098	53.7	50-55%	27.02	28.1	1	1
galGal_OR_368	NC_008465.4	1988770	1990026	+	1257	1257	51.9	50-55%	24.81	28.1	0.9	1
galGal_OR_369	NC_008465.4	1997313	1998356	-	1044	1044	52.2	50-55%	17.12	28.1	0.6	1
galGal_OR_37	NC_006092.5	1272029	1273081	+	1053	1053	44	40-45%	29.49	29.7	1	1
galGal_OR_370	NC_008465.4	2007437	2008426	+	990	990	54.1	50-55%	0	28.1	0	0
galGal_OR_371	NC_008465.4	2012217	2013257	-	1041	1041	53.3	50-55%	8.08	28.1	0.3	0
galGal_OR_372	NC_008465.4	2021662	2022651	+	990	990	54.1	50-55%	0	28.1	0	0
galGal_OR_373	NC_008465.4	2026442	2027504	-	1063	1063	53.1	50-55%	0	28.1	0	0
galGal_OR_374	NC_008465.4	2036759	2037796	+	1038	1038	53.9	50-55%	24	28.1	0.9	1
galGal_OR_375	NC_008465.4	2038826	2039275	+	450	450	51.6	50-55%	24.21	28.1	0.9	1
galGal_OR_376	NC_008465.4	2044452	2045498	-	1047	1047	53.1	50-55%	28.3	28.1	1	1
galGal_OR_377	NC_008465.4	2053318	2054337	-	1020	1020	54.7	50-55%	20.85	28.1	0.7	1
galGal_OR_378	NC_008465.4	2060313	2061353	-	1041	1041	53.5	50-55%	10.25	28.1	0.4	0
galGal_OR_379	NC_008465.4	2069246	2070355	+	1110	1110	53	50-55%	25.82	28.1	0.9	1
galGal_OR_38	NC_006092.5	1275481	1276014	+	534	534	43.8	40-45%	28.27	29.7	1	1
galGal_OR_380	NC_008465.4	2076588	2076962	-	375	375	44.3	40-45%	14	29.7	0.5	1
galGal_OR_381	NC_008465.4	2077913	2079028	-	1116	1116	52.1	50-55%	24.22	28.1	0.9	1
galGal_OR_382	NC_008465.4	2084635	2085663	-	1029	1029	55.2	55-60%	22.21	27.2	0.8	1
galGal_OR_383	NC_008465.4	2094373	2095473	-	1101	1101	52.1	50-55%	12.95	28.1	0.5	1
galGal_OR_384	NC_008465.4	2103950	2105029	+	1080	1080	54.2	50-55%	28.33	28.1	1	1
galGal_OR_385	NC_008465.4	2113551	2114597	+	1047	1047	53.1	50-55%	24.96	28.1	0.9	1
galGal_OR_386	NC_008465.4	2122807	2123841	+	1035	1035	52.9	50-55%	9.6	28.1	0.3	0
galGal_OR_387	NC_008465.4	2134026	2135063	-	1038	1038	54.8	50-55%	24.59	28.1	0.9	1
galGal_OR_388	NC_008465.4	2143787	2144881	+	1095	1095	52.9	50-55%	18.33	28.1	0.7	1
galGal_OR_389	NC_008465.4	2150847	2151935	-	1089	1089	52.8	50-55%	20.08	28.1	0.7	1
galGal_OR_39	NC_006092.5	1280020	1281066	+	1047	1047	45.9	45-50%	26.2	28.9	0.9	1
galGal_OR_390	NC_008465.4	2161037	2162116	+	1080	1080	53.4	50-55%	23.52	28.1	0.8	1
galGal_OR_391	NC_008465.4	2172097	2173140	+	1044	1044	54.6	50-55%	17.5	28.1	0.6	1
galGal_OR_392	NC_008465.4	2177132	2178220	-	1089	1089	52.9	50-55%	23.57	28.1	0.8	1
galGal_OR_393	NC_008465.4	2186417	2187493	+	1077	1077	53.5	50-55%	20.37	28.1	0.7	1
galGal_OR_394	NC_008465.4	2192038	2193168	-	1131	1131	52.3	50-55%	6.03	28.1	0.2	0
galGal_OR_395	NC_008465.4	2201343	2202431	+	1089	1089	53	50-55%	19.68	28.1	0.7	1
galGal_OR_396	NC_008465.4	2206970	2208073	-	1104	1104	52.5	50-55%	27.02	28.1	1	1
galGal_OR_397	NC_008465.4	2215204	2216283	+	1080	1080	53.1	50-55%	22.31	28.1	0.8	1
galGal_OR_398	NC_008465.4	2220896	2221921	-	1026	1026	55.2	55-60%	20.68	27.2	0.8	1
galGal_OR_399	NC_008465.4	2231284	2232348	+	1065	1065	52.8	50-55%	25.14	28.1	0.9	1
galGal_OR_4	NC_006088.5	197191384	197192478	-	1095	1095	57	55-60%	26.6	27.2	1	1
galGal_OR_40	NC_006092.5	1606861	1607931	-	1071	1071	44.4	40-45%	30.72	29.7	1	1
galGal_OR_400	NC_008465.4	2237552	2238568	+	1017	1017	53.7	50-55%	8.63	28.1	0.3	0
galGal_OR_401	NC_008465.4	2239563	2240117	+	555	555	47.6	45-50%	24.07	28.9	0.8	1
galGal_OR_402	NC_008465.4	2244050	2245120	-	1071	1071	53.5	50-55%	7.72	28.1	0.3	0
galGal_OR_403	NC_008465.4	2255329	2256405	-	1077	1077	54.1	50-55%	5.15	28.1	0.2	0
galGal_OR_404	NC_008465.4	2268626	2269828	+	1203	1203	51	50-55%	4.51	28.1	0.2	0
galGal_OR_405	NC_008465.4	2276852	2277907	+	1056	1056	54.7	50-55%	28.86	28.1	1	1
galGal_OR_406	NC_008465.4	2283902	2284936	-	1035	1035	53.6	50-55%	15.16	28.1	0.5	1
galGal_OR_407	NC_008465.4	2292838	2293992	+	1155	1155	51.7	50-55%	25.49	28.1	0.9	1
galGal_OR_408	NC_008465.4	2306698	2307762	-	1065	1065	52.8	50-55%	27.46	28.1	1	1
galGal_OR_409	NC_008465.4	2315192	2316238	+	1047	1047	53.7	50-55%	20.27	28.1	0.7	1
galGal_OR_41	NC_006092.5	1609905	1611020	-	1116	1116	43.5	40-45%	29.78	29.7	1	1
galGal_OR_410	NC_008465.4	2319840	2320916	+	1077	1077	53.8	50-55%	28.05	28.1	1	1
galGal_OR_411	NC_008465.4	2331222	2332208	-	987	987	54.5	50-55%	12.22	28.1	0.4	0
galGal_OR_412	NC_008465.4	2337416	2338507	-	1092	1092	51.6	50-55%	24.82	28.1	0.9	1
galGal_OR_413	NC_008465.4	2346165	2347250	+	1086	1086	52.9	50-55%	19.21	28.1	0.7	1
galGal_OR_414	NC_008465.4	2352008	2353063	-	1056	1056	54.6	50-55%	22.92	28.1	0.8	1
galGal_OR_415	NC_008465.4	2358600	2359652	-	1053	1053	53.8	50-55%	19.17	28.1	0.7	1
galGal_OR_416	NC_008465.4	2367638	2368663	+	1026	1026	53.5	50-55%	22.93	28.1	0.8	1
galGal_OR_417	NC_008465.4	2381526	2382233	-	708	708	50.7	50-55%	23.95	28.1	0.9	1
galGal_OR_418	NC_008465.4	2384171	2385247	-	1077	1077	52.7	50-55%	21.17	28.1	0.8	1
galGal_OR_419	NC_008465.4	2393642	2394727	+	1086	1086	52.6	50-55%	22.2	28.1	0.8	1
galGal_OR_42	NC_006092.5	1615753	1616877	-	1125	1125	52.9	50-55%	26.56	28.1	0.9	1
galGal_OR_420	NC_008465.4	2399805	2400875	+	1071	1071	53.5	50-55%	33.05	28.1	1.2	1
galGal_OR_421	NC_008465.4	2406805	2407938	-	1134	1134	51.4	50-55%	24.11	28.1	0.9	1
galGal_OR_422	NC_008465.4	2414649	2415665	+	1017	1017	53	50-55%	23.97	28.1	0.9	1
galGal_OR_423	NC_008465.4	2420794	2421870	+	1077	1077	52.7	50-55%	23.09	28.1	0.8	1
galGal_OR_424	NC_008465.4	2424068	2424823	+	756	756	49.6	45-50%	22.69	28.9	0.8	1
galGal_OR_425	NC_008465.4	2431153	2432238	-	1086	1086	54.3	50-55%	23.33	28.1	0.8	1
galGal_OR_426	NC_008465.4	2440124	2441173	+	1050	1050	53.8	50-55%	0	28.1	0	0
galGal_OR_427	NC_008465.4	2448610	2449239	-	630	630	51.7	50-55%	20.46	28.1	0.7	1
galGal_OR_428	NC_008465.4	2455535	2456563	+	1029	1029	53.7	50-55%	22.76	28.1	0.8	1
galGal_OR_429	NC_008465.4	2464968	2466086	+	1119	1119	51.4	50-55%	26.58	28.1	0.9	1
galGal_OR_43	NC_006097.5	1183567	1184625	+	1059	1059	43.8	40-45%	22.59	29.7	0.8	1
galGal_OR_430	NC_008465.4	2469508	2470542	-	1035	1035	53.5	50-55%	28.43	28.1	1	1
galGal_OR_431	NC_008465.4	2479523	2480692	+	1170	1170	50.9	50-55%	26.46	28.1	0.9	1
galGal_OR_432	NC_008465.4	2488449	2489213	-	765	765	51.5	50-55%	25.74	28.1	0.9	1
galGal_OR_433	NC_008465.4	2495832	2496956	+	1125	1125	51.6	50-55%	27.19	28.1	1	1
galGal_OR_434	NC_008465.4	2502139	2503203	+	1065	1065	54.1	50-55%	24.21	28.1	0.9	1
galGal_OR_435	NC_008465.4	2506909	2508042	-	1134	1134	51.5	50-55%	24.67	28.1	0.9	1
galGal_OR_436	NC_008465.4	2516214	2517311	+	1098	1098	53.2	50-55%	18.36	28.1	0.7	1
galGal_OR_437	NC_008465.4	2521919	2522401	-	483	483	48.2	45-50%	9.88	28.9	0.3	0
galGal_OR_438	NC_008465.4	2523428	2524471	-	1044	1044	53.8	50-55%	19.91	28.1	0.7	1
galGal_OR_439	NC_008465.4	2532899	2533990	+	1092	1092	53.9	50-55%	23.82	28.1	0.8	1
galGal_OR_44	NC_006097.5	1192366	1193345	-	980	980	48.3	45-50%	1.02	28.9	0	0
galGal_OR_440	NC_008465.4	2539532	2540632	-	1101	1101	52	50-55%	21.98	28.1	0.8	1
galGal_OR_441	NC_008465.4	2548047	2549065	+	1019	1019	53.2	50-55%	27.41	28.1	1	1
galGal_OR_442	NC_008465.4	2555154	2556230	-	1077	1077	53.7	50-55%	16.38	28.1	0.6	1
galGal_OR_443	NC_008465.4	2564355	2565368	+	1014	1014	53.9	50-55%	29.45	28.1	1	1
galGal_OR_444	NC_008465.4	2570255	2571346	-	1092	1092	53.9	50-55%	23.3	28.1	0.8	1
galGal_OR_445	NC_008465.4	2576506	2577540	-	1035	1035	52.7	50-55%	26.78	28.1	1	1
galGal_OR_446	NC_008465.4	2585584	2586624	+	1041	1041	53.8	50-55%	27.42	28.1	1	1
galGal_OR_447	NC_008465.4	2587650	2588042	+	393	393	43.3	40-45%	23	29.7	0.8	1
galGal_OR_448	NC_008465.4	2594285	2595358	-	1074	1074	52.2	50-55%	22.7	28.1	0.8	1
galGal_OR_449	NC_008465.4	2606007	2607047	+	1041	1041	52.6	50-55%	25.46	28.1	0.9	1
galGal_OR_45	NC_006097.5	1207383	1208436	+	1054	1054	44	40-45%	21.3	29.7	0.7	1
galGal_OR_450	NC_008465.4	2614352	2615470	+	1119	1119	54.2	50-55%	15.22	28.1	0.5	1
galGal_OR_451	NC_008465.4	2620499	2621572	-	1074	1074	53.1	50-55%	7.17	28.1	0.3	0
galGal_OR_452	NC_008465.4	2628744	2629796	+	1053	1053	53.7	50-55%	26.74	28.1	1	1
galGal_OR_453	NC_008465.4	2636760	2637863	-	1104	1104	52.9	50-55%	20.97	28.1	0.7	1
galGal_OR_454	NC_008465.4	2645682	2646728	+	1047	1047	53.4	50-55%	12.34	28.1	0.4	0
galGal_OR_455	NC_008465.4	2647693	2648262	+	570	570	48.2	45-50%	27.9	28.9	1	1
galGal_OR_456	NC_008465.4	2654310	2655365	-	1056	1056	53.9	50-55%	21.7	28.1	0.8	1
galGal_OR_457	NC_008465.4	2655777	2656646	+	870	870	49.3	45-50%	26.9	28.9	0.9	1
galGal_OR_458	NC_008465.4	2662839	2663945	-	1107	1107	53.1	50-55%	25.88	28.1	0.9	1
galGal_OR_459	NC_008465.4	2671836	2672855	+	1020	1020	54.6	50-55%	24.22	28.1	0.9	1
galGal_OR_46	NC_006097.5	1214070	1215146	-	1077	1077	47	45-50%	21.27	28.9	0.7	1
galGal_OR_460	NC_008465.4	2678986	2680059	-	1074	1074	54.1	50-55%	17.28	28.1	0.6	1
galGal_OR_461	NC_008465.4	2688558	2689640	+	1083	1083	52.1	50-55%	13.58	28.1	0.5	1
galGal_OR_462	NC_008465.4	2694029	2695087	+	1059	1059	53.9	50-55%	5.48	28.1	0.2	0
galGal_OR_463	NC_008465.4	2701788	2702276	-	489	489	47.6	45-50%	27.08	28.9	0.9	1
galGal_OR_464	NC_008465.4	2703305	2704360	-	1056	1056	53.1	50-55%	25.83	28.1	0.9	1
galGal_OR_465	NC_008465.4	2711077	2712189	+	1113	1113	50.6	50-55%	28.34	28.1	1	1
galGal_OR_466	NC_008465.4	2717944	2718899	-	956	956	50.9	50-55%	27.55	28.1	1	1
galGal_OR_467	NC_008465.4	2726880	2727884	-	1005	1005	52.3	50-55%	30.96	28.1	1.1	1
galGal_OR_468	NC_008465.4	2733878	2734889	+	1012	1012	52.9	50-55%	28.8	28.1	1	1
galGal_OR_469	NC_008465.4	2739735	2740776	+	1042	1042	52.9	50-55%	25.89	28.1	0.9	1
galGal_OR_47	NC_006097.5	1221614	1222618	+	1005	1005	46.1	45-50%	10.86	28.9	0.4	0
galGal_OR_470	NC_008465.4	2751963	2752922	-	960	960	51.9	50-55%	30.26	28.1	1.1	1
galGal_OR_471	NC_008465.4	2761758	2762755	+	998	998	52.7	50-55%	25.61	28.1	0.9	1
galGal_OR_472	NC_028740.2	27959	29080	+	1122	1122	54.9	50-55%	0	28.1	0	0
galGal_OR_473	NC_028740.2	40395	41531	-	1137	1137	55.2	55-60%	0	27.2	0	0
galGal_OR_474	NC_028740.2	251493	252476	+	984	984	55.8	55-60%	0	27.2	0	0
galGal_OR_475	NC_028740.2	270634	271705	+	1072	1072	55.2	55-60%	0	27.2	0	0
galGal_OR_476	NC_028740.2	288466	289586	-	1121	1121	55.2	55-60%	1.52	27.2	0.1	0
galGal_OR_477	NC_028740.2	324237	325299	-	1063	1063	55.6	55-60%	0.09	27.2	0	0
galGal_OR_478	NC_028740.2	328811	329746	-	936	936	56.4	55-60%	0	27.2	0	0
galGal_OR_479	NC_028740.2	333287	334345	-	1059	1059	56.3	55-60%	0	27.2	0	0
galGal_OR_48	NC_006097.5	1235501	1236547	+	1047	1047	43.6	40-45%	18.51	29.7	0.6	1
galGal_OR_480	NC_028740.2	357659	358837	+	1179	1179	54.5	50-55%	3.91	28.1	0.1	0
galGal_OR_481	NC_028740.2	385562	386654	-	1093	1093	54.7	50-55%	0.09	28.1	0	0
galGal_OR_482	NC_028740.2	405476	406591	+	1116	1116	55.2	55-60%	4.57	27.2	0.2	0
galGal_OR_483	NC_028740.2	422718	423802	+	1085	1085	56	55-60%	0.85	27.2	0	0
galGal_OR_484	NC_028740.2	439783	440842	+	1060	1060	55.4	55-60%	0.7	27.2	0	0
galGal_OR_485	NC_028740.2	462346	463467	-	1122	1122	55.7	55-60%	3.73	27.2	0.1	0
galGal_OR_486	NC_028740.2	492251	493338	+	1088	1088	55.6	55-60%	0	27.2	0	0
galGal_OR_487	NC_028740.2	511908	512980	+	1073	1073	55	55-60%	0.7	27.2	0	0
galGal_OR_488	NC_028740.2	530563	531619	+	1057	1057	55.3	55-60%	0.33	27.2	0	0
galGal_OR_489	NC_028740.2	548517	549637	-	1121	1121	55.4	55-60%	0.94	27.2	0	0
galGal_OR_49	NC_006097.5	1244263	1245357	-	1095	1095	48.4	45-50%	20.4	28.9	0.7	1
galGal_OR_490	NC_028740.2	573241	574214	+	974	974	55.6	55-60%	0.14	27.2	0	0
galGal_OR_491	NC_028740.2	591754	592704	-	951	951	56.9	55-60%	0	27.2	0	0
galGal_OR_492	NC_028740.2	613032	614074	+	1043	1043	56	55-60%	0.1	27.2	0	0
galGal_OR_493	NC_028740.2	629411	630531	+	1121	1121	55.6	55-60%	9.94	27.2	0.4	0
galGal_OR_494	NC_028740.2	646000	647136	-	1137	1137	55.1	55-60%	4.1	27.2	0.2	0
galGal_OR_495	NC_028740.2	676700	677748	-	1049	1049	56	55-60%	1.59	27.2	0.1	0
galGal_OR_496	NC_028740.2	713315	714436	-	1122	1122	55.4	55-60%	0.18	27.2	0	0
galGal_OR_497	NC_028740.2	738121	739214	+	1094	1094	54.7	50-55%	0.67	28.1	0	0
galGal_OR_498	NC_028740.2	754304	755425	+	1122	1122	55.3	55-60%	6.17	27.2	0.2	0
galGal_OR_499	NC_028740.2	828839	829942	-	1104	1104	55	55-60%	2.56	27.2	0.1	0
galGal_OR_5	NC_006088.5	197204550	197205519	+	970	970	57.1	55-60%	23.06	27.2	0.8	1
galGal_OR_50	NC_006097.5	1250940	1251959	+	1020	1020	45.1	45-50%	2.41	28.9	0.1	0
galGal_OR_500	NC_028740.2	848332	849488	-	1157	1157	54.5	50-55%	0.56	28.1	0	0
galGal_OR_501	NC_028740.2	887367	888479	+	1113	1113	55.6	55-60%	0.18	27.2	0	0
galGal_OR_502	NC_028740.2	971122	972366	-	1245	1245	53.5	50-55%	6.71	28.1	0.2	0
galGal_OR_503	NC_028740.2	1055367	1056378	-	1012	1012	55.9	55-60%	0.2	27.2	0	0
galGal_OR_504	NC_028740.2	1070048	1071160	+	1113	1113	55.9	55-60%	0.6	27.2	0	0
galGal_OR_505	NC_028740.2	1138177	1139230	+	1054	1054	55.5	55-60%	0.47	27.2	0	0
galGal_OR_506	NC_028740.2	1147895	1148967	-	1073	1073	55.4	55-60%	0.47	27.2	0	0
galGal_OR_507	NC_028740.2	1207479	1208600	-	1122	1122	55.7	55-60%	2.8	27.2	0.1	0
galGal_OR_508	NC_028740.2	1241058	1242078	+	1021	1021	56.2	55-60%	0.09	27.2	0	0
galGal_OR_509	NC_028740.2	1266982	1268101	+	1120	1120	54.7	50-55%	0.18	28.1	0	0
galGal_OR_51	NC_006097.5	1265680	1266174	-	495	495	50.1	50-55%	0	28.1	0	0
galGal_OR_510	NC_028740.2	1294962	1296083	+	1122	1122	55.4	55-60%	0	27.2	0	0
galGal_OR_511	NC_028740.2	1314075	1315081	+	1007	1007	56.2	55-60%	0	27.2	0	0
galGal_OR_512	NC_028740.2	1336209	1337231	+	1023	1023	55.9	55-60%	0	27.2	0	0
galGal_OR_513	NC_028740.2	1356929	1358079	-	1151	1151	54.7	50-55%	1.05	28.1	0	0
galGal_OR_514	NC_028740.2	1382438	1383422	+	985	985	56.3	55-60%	0.91	27.2	0	0
galGal_OR_515	NC_028740.2	1399162	1400156	-	995	995	56.3	55-60%	0	27.2	0	0
galGal_OR_516	NC_028740.2	1419237	1420204	-	968	968	56.7	55-60%	0.1	27.2	0	0
galGal_OR_517	NC_028740.2	1446311	1447401	-	1091	1091	55	55-60%	0	27.2	0	0
galGal_OR_518	NC_028740.2	1471166	1472299	+	1134	1134	55.2	55-60%	0	27.2	0	0
galGal_OR_519	NC_028740.2	1484139	1485356	+	1218	1218	55	55-60%	0	27.2	0	0
galGal_OR_52	NC_006097.5	1271890	1272909	+	1020	1020	45	45-50%	7.14	28.9	0.2	0
galGal_OR_520	NC_028740.2	1519088	1519510	-	423	423	51.1	50-55%	7.45	28.1	0.3	0
galGal_OR_521	NC_028740.2	1558577	1559734	+	1158	1158	54.7	50-55%	2.25	28.1	0.1	0
galGal_OR_522	NC_028740.2	1578349	1579455	-	1107	1107	54.8	50-55%	1.31	28.1	0	0
galGal_OR_523	NC_028740.2	1604638	1605750	+	1113	1113	56	55-60%	2.84	27.2	0.1	0
galGal_OR_524	NC_028740.2	1623546	1624648	-	1103	1103	55.9	55-60%	0	27.2	0	0
galGal_OR_525	NC_028740.2	1649690	1650764	+	1075	1075	55.3	55-60%	1.58	27.2	0.1	0
galGal_OR_526	NC_028740.2	1685340	1686371	+	1032	1032	55.9	55-60%	0	27.2	0	0
galGal_OR_527	NC_028740.2	1704434	1705555	+	1122	1122	55.6	55-60%	0.78	27.2	0	0
galGal_OR_528	NC_028740.2	1724975	1726246	-	1272	1272	54.3	50-55%	0.29	28.1	0	0
galGal_OR_529	NC_028740.2	1745401	1746470	-	1070	1070	55.2	55-60%	0.09	27.2	0	0
galGal_OR_53	NC_006097.5	1283246	1284322	+	1077	1077	39.7	35-40%	31.64	30.4	1	1
galGal_OR_530	NC_028740.2	1854955	1856013	+	1059	1059	55.7	55-60%	0	27.2	0	0
galGal_OR_531	NC_028740.2	1877437	1878575	+	1139	1139	55.2	55-60%	3.09	27.2	0.1	0
galGal_OR_532	NW_020109895.1	2111	2518	-	408	408	44.9	40-45%	0.9	29.7	0	0
galGal_OR_533	NW_020110128.1	2162	3188	-	1027	1027	55.3	55-60%	0.92	27.2	0	0
galGal_OR_534	NW_020110143.1	4202	5304	+	1103	1103	56	55-60%	0	27.2	0	0
galGal_OR_535	NW_020110165.1	1674705	1675769	-	1065	1065	58.1	55-60%	26	27.2	1	1
galGal_OR_536	NW_020110167.1	83969	84494	+	526	526	48.9	45-50%	0	28.9	0	0
galGal_OR_537	NW_020110167.1	91867	92960	-	1094	1094	52.5	50-55%	0.91	28.1	0	0
galGal_OR_538	NW_020110167.1	100138	101208	+	1071	1071	52.8	50-55%	0	28.1	0	0
galGal_OR_539	NW_020110167.1	110325	110813	+	489	489	49.3	45-50%	0	28.9	0	0
galGal_OR_54	NC_006097.5	1289243	1290322	+	1080	1080	43.1	40-45%	29.78	29.7	1	1
galGal_OR_540	NW_020110167.1	1398915	1399967	+	1053	1053	50	50-55%	28.61	28.1	1	1
galGal_OR_541	NW_020110167.1	1402421	1402588	+	168	168	51.2	50-55%	31.1	28.1	1.1	1
galGal_OR_542	NW_020110167.1	1412246	1413253	+	1008	1008	48.3	45-50%	27.99	28.9	1	1
galGal_OR_543	NW_020110167.1	1418700	1419761	+	1062	1062	50.4	50-55%	23.84	28.1	0.8	1
galGal_OR_544	NC_006103.5	811922	812107	+	186	186	47.8	45-50%	0	28.9	0	0
galGal_OR_545	NC_006103.5	1035524	1036440	-	917	917	52.9	50-55%	0	28.1	0	0
galGal_OR_546	NC_006103.5	1324390	1324647	-	258	258	52.3	50-55%	0	28.1	0	0
galGal_OR_547	NC_006103.5	1707301	1707687	-	387	387	54.3	50-55%	35.79	28.1	1.3	1
galGal_OR_548	NC_006104.5	534589	535019	+	431	431	54.5	50-55%	3.4	28.1	0.1	0
galGal_OR_549	NC_006104.5	559593	560023	-	431	431	54.5	50-55%	2.24	28.1	0.1	0
galGal_OR_55	NC_006098.5	2658418	2659538	+	1121	1121	50	50-55%	31.52	28.1	1.1	1
galGal_OR_550	NC_008465.4	1205374	1205646	-	273	273	61.9	60-65%	19.48	26	0.7	1
galGal_OR_554	NC_006092.5	89882	90163	-	282	282	51.1	50-55%	27.73	28.1	1	1
galGal_OR_56	NC_006103.5	754782	755890	+	1109	1109	51.2	50-55%	8.65	28.1	0.3	0
galGal_OR_57	NC_006103.5	758003	758577	-	575	575	54.3	50-55%	1.07	28.1	0	0
galGal_OR_58	NC_006103.5	777048	778112	+	1065	1065	46.6	45-50%	12.08	28.9	0.4	0
galGal_OR_59	NC_006103.5	790011	790706	-	696	696	54.7	50-55%	10.75	28.1	0.4	0
galGal_OR_6	NC_006088.5	197221536	197222654	+	1119	1119	44.7	40-45%	36.86	29.7	1.2	1
galGal_OR_60	NC_006103.5	796641	797077	+	437	437	59.7	55-60%	0	27.2	0	0
galGal_OR_61	NC_006103.5	823963	824622	-	660	660	55.9	55-60%	0	27.2	0	0
galGal_OR_62	NC_006103.5	830580	831528	+	949	949	56	55-60%	24.37	27.2	0.9	1
galGal_OR_63	NC_006103.5	833704	834741	-	1038	1038	53.5	50-55%	16.32	28.1	0.6	1
galGal_OR_64	NC_006103.5	885111	886175	+	1065	1065	46.9	45-50%	17.17	28.9	0.6	1
galGal_OR_65	NC_006103.5	898323	898986	-	664	664	54.5	50-55%	58.05	28.1	2.1	2
galGal_OR_66	NC_006103.5	951661	952725	+	1065	1065	46.7	45-50%	18.18	28.9	0.6	1
galGal_OR_67	NC_006103.5	964620	965199	-	580	580	55.9	55-60%	15.45	27.2	0.6	1
galGal_OR_68	NC_006103.5	971254	972192	+	939	939	56.1	55-60%	43.12	27.2	1.6	2
galGal_OR_69	NC_006103.5	974250	974990	-	741	741	50.1	50-55%	17.33	28.1	0.6	1
galGal_OR_7	NC_006088.5	197226431	197227498	+	1068	1068	55.5	55-60%	28.94	27.2	1.1	1
galGal_OR_70	NC_006103.5	1014035	1015159	+	1125	1125	46.5	45-50%	34.25	28.9	1.2	1
galGal_OR_71	NC_006103.5	1027284	1027802	-	519	519	55.3	55-60%	5.31	27.2	0.2	0
galGal_OR_72	NC_006103.5	1033128	1034029	+	902	902	56.3	55-60%	0	27.2	0	0
galGal_OR_73	NC_006103.5	1072332	1073396	+	1065	1065	46.5	45-50%	16.81	28.9	0.6	1
galGal_OR_74	NC_006103.5	1085261	1085921	-	661	661	54	50-55%	16.35	28.1	0.6	1
galGal_OR_75	NC_006103.5	1092774	1093688	+	915	915	55.6	55-60%	17.41	27.2	0.6	1
galGal_OR_76	NC_006103.5	1095126	1096172	-	1047	1047	53	50-55%	21.43	28.1	0.8	1
galGal_OR_77	NC_006103.5	1147162	1148226	+	1065	1065	46.5	45-50%	12.41	28.9	0.4	0
galGal_OR_78	NC_006103.5	1159393	1160091	-	699	699	54.5	50-55%	23.07	28.1	0.8	1
galGal_OR_79	NC_006103.5	1165180	1166116	+	937	937	55.9	55-60%	22.02	27.2	0.8	1
galGal_OR_8	NC_006088.5	197232896	197233942	+	1047	1047	52.1	50-55%	27.56	28.1	1	1
galGal_OR_80	NC_006103.5	1169243	1170288	-	1046	1046	53.4	50-55%	22.32	28.1	0.8	1
galGal_OR_81	NC_006103.5	1228882	1229937	+	1056	1056	47	45-50%	5.59	28.9	0.2	0
galGal_OR_82	NC_006103.5	1242234	1242798	-	565	565	56.1	55-60%	9.61	27.2	0.4	0
galGal_OR_83	NC_006103.5	1249738	1250685	+	948	948	55.9	55-60%	22.64	27.2	0.8	1
galGal_OR_84	NC_006103.5	1252813	1253880	-	1068	1068	53.1	50-55%	15.31	28.1	0.5	1
galGal_OR_85	NC_006103.5	1258145	1259224	-	1080	1080	50.7	50-55%	25.43	28.1	0.9	1
galGal_OR_86	NC_006103.5	1311477	1312532	+	1056	1056	46.9	45-50%	5.03	28.9	0.2	0
galGal_OR_87	NC_006103.5	1330659	1331014	+	356	356	59.3	55-60%	0	27.2	0	0
galGal_OR_88	NC_006103.5	1357888	1358952	+	1065	1065	46.5	45-50%	11.91	28.9	0.4	0
galGal_OR_89	NC_006103.5	1370547	1371207	-	661	661	54.3	50-55%	8.54	28.1	0.3	0
galGal_OR_9	NC_006088.5	197239661	197240809	+	1149	1149	50.7	50-55%	29.06	28.1	1	1
galGal_OR_90	NC_006103.5	1376119	1377015	+	897	897	56.2	55-60%	23.04	27.2	0.8	1
galGal_OR_91	NC_006103.5	1378475	1379521	-	1047	1047	53.3	50-55%	44.68	28.1	1.6	2
galGal_OR_92	NC_006103.5	1396172	1397147	-	976	976	52.9	50-55%	0	28.1	0	0
galGal_OR_93	NC_006103.5	1411541	1412476	+	936	936	55.8	55-60%	6.22	27.2	0.2	0
galGal_OR_94	NC_006103.5	1413895	1414785	-	891	891	52.6	50-55%	0	28.1	0	0
galGal_OR_95	NC_006103.5	1440877	1441923	+	1047	1047	52.8	50-55%	14.85	28.1	0.5	1
galGal_OR_96	NC_006103.5	1444016	1445035	-	1020	1020	56.4	55-60%	23.07	27.2	0.8	1
galGal_OR_97	NC_006103.5	1451928	1452548	+	621	621	56.8	55-60%	23.01	27.2	0.8	1
galGal_OR_98	NC_006103.5	1471165	1472229	-	1065	1065	46.4	45-50%	6.44	28.9	0.2	0
galGal_OR_99	NC_006103.5	1487010	1488074	+	1065	1065	46.3	45-50%	16.97	28.9	0.6	1
