# Supplementary material for: Olfactory receptor subgenome and expression in a highly olfactory procellariiform seabird
Source: Oxford University Press journal article supplement (doi:10.1093/genetics/iyab210), 2021-10-04
Supplement: iyab210_supplementary_table_s11.xlsx [file iyab210_supplementary_table_s11.xlsx]

## Sheet: Sheet1
Supplementary Table S11 Copy number ratio of intact OR genes in the chicken genome (Ggal6), based on the genome annotation.
ID	Scaffold	Start	End	Strand	Length	ACGT_length	%GC	GC_bin	Avg_DoC	GC_bin_avg_Doc	Ratio	Ratio_integer
NP_001008754.1_6261	NC_006088.5	197267483	197268442	-	960	960	53.5	50-55%	27.24	28.1	1	1
NP_001009878.1_6260	NC_006088.5	197261426	197262373	+	948	948	52.5	50-55%	20.88	28.1	0.7	1
NP_001025563.1_28115	NC_006097.5	1207419	1208391	+	973	973	44.2	40-45%	20.38	29.7	0.7	1
NP_001026347.1_18171	NC_006092.5	1254739	1255677	-	939	939	44.7	40-45%	27.29	29.7	0.9	1
NP_001026713.1_18045	NC_006092.5	505773	506771	-	999	999	52.4	50-55%	32.35	28.1	1.2	1
NP_001026714.1_18044	NC_006092.5	497608	498546	-	939	939	52.7	50-55%	28.24	28.1	1	1
NP_001026715.1_18179	NC_006092.5	1609959	1610897	-	939	939	43.7	40-45%	29.46	29.7	1	1
NP_001026716.1_18174	NC_006092.5	1272083	1273039	+	957	957	44.5	40-45%	28.51	29.7	1	1
NP_001292146.1_18172	NC_006092.5	1263112	1264050	+	939	939	49.7	45-50%	9.54	28.9	0.3	0
XP_001231852.3_46112	NC_008465.4	620153	620734	-	582	582	49.3	45-50%	28.04	28.9	1	1
XP_001231931.4_28123	NC_006097.5	1289309	1290313	+	1005	1005	43	40-45%	29.72	29.7	1	1
XP_001232129.3_43637	NC_006114.5	2213476	2214411	-	936	936	46.4	45-50%	27.3	28.9	0.9	1
XP_001232904.5_46253	NC_008465.4	2306707	2307474	-	768	768	50.8	50-55%	29.21	28.1	1	1
XP_001233617.4_46200	NC_008465.4	1633382	1634347	+	966	966	55.3	55-60%	25.5	27.2	0.9	1
XP_001233853.4_46257	NC_008465.4	2352017	2352979	-	963	963	54.9	50-55%	22.78	28.1	0.8	1
XP_001236519.2_46123	NC_008465.4	786931	787887	-	957	957	53.9	50-55%	23.95	28.1	0.9	1
XP_001236560.5_46272	NC_008465.4	2523419	2524315	-	897	897	53	50-55%	19	28.1	0.7	1
XP_001236945.3_46195	NC_008465.4	1569661	1570572	-	912	912	56	55-60%	24.61	27.2	0.9	1
XP_003643197.1_6257	NC_006088.5	197232953	197233945	+	993	993	52.4	50-55%	27.89	28.1	1	1
XP_003643328.4_46278	NC_008465.4	2586040	2586621	+	582	582	51	50-55%	32.43	28.1	1.2	1
XP_003643333.4_46084	NC_008465.4	240924	242276	-	1353	1353	51.7	50-55%	24.38	28.1	0.9	1
XP_003643650.4_46106	NC_008465.4	541705	542631	-	927	927	55.6	55-60%	23.44	27.2	0.9	1
XP_003643812.4_49761	NW_020110167.1	1398951	1399907	+	957	957	50.4	50-55%	28.55	28.1	1	1
XP_003643912.3_46092	NC_008465.4	336792	337748	+	957	957	53.9	50-55%	29.36	28.1	1	1
XP_003643985.3_46168	NC_008465.4	1234397	1234987	-	591	591	52.6	50-55%	23.95	28.1	0.9	1
XP_003644012.3_46281	NC_008465.4	2620520	2621128	-	609	609	51.6	50-55%	8.33	28.1	0.3	0
XP_003644025.3_46212	NC_008465.4	1780184	1781128	+	945	945	54.4	50-55%	26.02	28.1	0.9	1
XP_003644035.3_46124	NC_008465.4	796076	797035	+	960	960	54.6	50-55%	21.95	28.1	0.8	1
XP_003644036.4_46130	NC_008465.4	856998	857621	-	624	624	51.4	50-55%	24.08	28.1	0.9	1
XP_003644054.3_46109	NC_008465.4	589907	590842	-	936	936	53.8	50-55%	26.24	28.1	0.9	1
XP_003644056.3_46108	NC_008465.4	571956	572912	-	957	957	54.9	50-55%	3.3	28.1	0.1	0
XP_004937440.1_53	NC_006088.5	373193	374176	-	984	984	65	65-70%	25.23	24.6	1	1
XP_004938999.1_6084	NC_006088.5	194713971	194714450	-	480	480	57.7	55-60%	27.75	27.2	1	1
XP_004939027.1_6272	NC_006088.5	197352973	197353947	-	975	975	61.9	60-65%	25.26	26	1	1
XP_004939036.1_6250	NC_006088.5	197191480	197192442	-	963	963	57.6	55-60%	26.42	27.2	1	1
XP_004941405.1_18175	NC_006092.5	1280071	1286682	+	6612	6612	44.5	40-45%	28.77	29.7	1	1
XP_004943663.1_28122	NC_006097.5	1283318	1284292	+	975	975	39.7	35-40%	31.22	30.4	1	1
XP_004945782.1_35466	NC_006104.5	855861	856892	-	1032	1032	54.6	50-55%	26.98	28.1	1	1
XP_004949864.1_6259	NC_006088.5	197251621	197252568	+	948	948	53	50-55%	18.37	28.1	0.7	1
XP_004949865.1_6258	NC_006088.5	197239709	197240656	+	948	948	52.8	50-55%	29.41	28.1	1	1
XP_004949868.1_6255	NC_006088.5	197226491	197227447	+	957	957	56.1	55-60%	28.45	27.2	1	1
XP_004950106.2_46283	NC_008465.4	2636847	2637782	-	936	936	54.7	50-55%	21.03	28.1	0.7	1
XP_004950116.2_46080	NC_008465.4	197465	198400	-	936	936	55.3	55-60%	20.14	27.2	0.7	1
XP_004950652.3_46238	NC_008465.4	2144051	2144716	+	666	666	53.9	50-55%	17.98	28.1	0.6	1
XP_004951107.3_46175	NC_008465.4	1317259	1317837	-	579	579	50.8	50-55%	24.35	28.1	0.9	1
XP_004951121.2_46129	NC_008465.4	844698	845432	+	735	735	53.6	50-55%	18.05	28.1	0.6	1
XP_015127991.2_46153	NC_008465.4	1096879	1097682	+	804	804	51.7	50-55%	6.35	28.1	0.2	0
XP_015127992.2_46154	NC_008465.4	1103734	1104651	-	918	918	55	55-60%	13.23	27.2	0.5	1
XP_015127995.2_46160	NC_008465.4	1151712	1168451	+	16740	16740	48.3	45-50%	28.92	28.9	1	1
XP_015127997.1_46170	NC_008465.4	1258295	1259230	-	936	936	54.1	50-55%	23.03	28.1	0.8	1
XP_015127999.1_46174	NC_008465.4	1308171	1309106	+	936	936	55.6	55-60%	20.96	27.2	0.8	1
XP_015128000.2_46178	NC_008465.4	1346250	1346984	+	735	735	53.5	50-55%	28.54	28.1	1	1
XP_015128001.2_46179	NC_008465.4	1353343	1353828	+	486	486	55.3	55-60%	20.08	27.2	0.7	1
XP_015128002.2_46180	NC_008465.4	1361222	1362157	-	936	936	55	55-60%	12.49	27.2	0.5	1
XP_015128004.1_46182	NC_008465.4	1380754	1381713	+	960	960	54.1	50-55%	24.16	28.1	0.9	1
XP_015128006.1_46183	NC_008465.4	1395088	1395669	-	582	582	51	50-55%	23.95	28.1	0.9	1
XP_015128007.1_46184	NC_008465.4	1402143	1403108	-	966	966	55.2	55-60%	14.45	27.2	0.5	1
XP_015128009.2_46186	NC_008465.4	1437137	1438592	+	1456	1456	53.3	50-55%	24.14	28.1	0.9	1
XP_015128011.1_46190	NC_008465.4	1510446	1510985	+	540	540	50	50-55%	28.14	28.1	1	1
XP_015128013.1_46196	NC_008465.4	1578295	1579263	+	969	969	54.3	50-55%	16.14	28.1	0.6	1
XP_015128015.2_46199	NC_008465.4	1617777	1618736	+	960	960	54.4	50-55%	21.59	28.1	0.8	1
XP_015128017.2_46203	NC_008465.4	1667212	1667784	+	573	573	50.8	50-55%	2.43	28.1	0.1	0
XP_015128019.2_46209	NC_008465.4	1725871	1747374	-	21504	21504	48.3	45-50%	23.01	28.9	0.8	1
XP_015128021.2_46211	NC_008465.4	1775557	1776492	+	936	936	53.7	50-55%	23.07	28.1	0.8	1
XP_015128022.1_46215	NC_008465.4	1824069	1825004	-	936	936	55.7	55-60%	13.68	27.2	0.5	1
XP_015128026.1_46221	NC_008465.4	1885600	1886535	+	936	936	54.8	50-55%	24.4	28.1	0.9	1
XP_015128027.2_46222	NC_008465.4	1908969	1909862	+	894	894	53.5	50-55%	26	28.1	0.9	1
XP_015128029.1_46228	NC_008465.4	1978662	1979597	-	936	936	55.7	55-60%	27.21	27.2	1	1
XP_015128032.2_46240	NC_008465.4	2161127	2162062	+	936	936	55	55-60%	22.32	27.2	0.8	1
XP_015128036.1_46243	NC_008465.4	2186507	2187442	+	936	936	54.6	50-55%	20.28	28.1	0.7	1
XP_015128037.2_46158	NC_008465.4	1140939	1141850	-	912	912	54.1	50-55%	42.65	28.1	1.5	2
XP_015128038.2_46163	NC_008465.4	1189386	1189940	+	555	555	51.7	50-55%	29.33	28.1	1	1
XP_015128039.2_46149	NC_008465.4	1063997	1064392	-	396	396	58.1	55-60%	19.69	27.2	0.7	1
XP_015128040.1_46187	NC_008465.4	1472245	1473180	+	936	936	54.3	50-55%	19.52	28.1	0.7	1
XP_015128041.2_46171	NC_008465.4	1276710	1277666	-	957	957	54.9	50-55%	2.97	28.1	0.1	0
XP_015128042.1_46245	NC_008465.4	2215270	2216229	+	960	960	54.8	50-55%	21.64	28.1	0.8	1
XP_015128043.2_46198	NC_008465.4	1607865	1608824	-	960	960	54.3	50-55%	20.52	28.1	0.7	1
XP_015128044.2_46172	NC_008465.4	1284112	1285261	+	1150	1150	52.1	50-55%	25.2	28.1	0.9	1
XP_015128045.2_46166	NC_008465.4	1214446	1215180	+	735	735	53.2	50-55%	16.49	28.1	0.6	1
XP_015128048.2_46232	NC_008465.4	2053315	2054241	-	927	927	54.7	50-55%	20.82	28.1	0.7	1
XP_015128050.1_46287	NC_008465.4	2694086	2695045	+	960	960	54.9	50-55%	6.01	28.1	0.2	0
XP_015128055.1_46074	NC_008465.4	141774	142550	-	777	777	52.3	50-55%	24.75	28.1	0.9	1
XP_015128056.2_46081	NC_008465.4	207527	208441	-	915	915	56.1	55-60%	21.84	27.2	0.8	1
XP_015128057.2_46079	NC_008465.4	185417	186343	-	927	927	55.2	55-60%	23.4	27.2	0.9	1
XP_015128070.1_46256	NC_008465.4	2346252	2347211	+	960	960	54.3	50-55%	18.38	28.1	0.7	1
XP_015128071.1_46255	NC_008465.4	2319924	2320859	+	936	936	55.2	55-60%	26.99	27.2	1	1
XP_015128072.2_46258	NC_008465.4	2358627	2359562	-	936	936	54.9	50-55%	19.67	28.1	0.7	1
XP_015128086.1_46090	NC_008465.4	295188	296147	+	960	960	55.1	55-60%	21.91	27.2	0.8	1
XP_015128087.2_46091	NC_008465.4	313720	314676	+	957	957	54.8	50-55%	24.02	28.1	0.9	1
XP_015128104.2_46085	NC_008465.4	249995	250915	+	921	921	54.1	50-55%	5.92	28.1	0.2	0
XP_015128368.2_46118	NC_008465.4	746552	747490	+	939	939	52.9	50-55%	20.71	28.1	0.7	1
XP_015128369.1_46121	NC_008465.4	771844	772827	-	984	984	54.5	50-55%	20.44	28.1	0.7	1
XP_015128371.2_46127	NC_008465.4	829218	830159	+	942	942	54.1	50-55%	15.89	28.1	0.6	1
XP_015128372.2_46134	NC_008465.4	907265	907819	+	555	555	52.3	50-55%	25.82	28.1	0.9	1
XP_015128373.2_46137	NC_008465.4	933138	934124	+	987	987	54	50-55%	21.98	28.1	0.8	1
XP_015128377.2_46142	NC_008465.4	978501	979436	+	936	936	54.4	50-55%	28.29	28.1	1	1
XP_015128378.1_46143	NC_008465.4	986373	987332	-	960	960	54.9	50-55%	28.46	28.1	1	1
XP_015128379.1_46144	NC_008465.4	995259	996194	+	936	936	54.5	50-55%	24.27	28.1	0.9	1
XP_015128380.2_46145	NC_008465.4	1020178	1021041	-	864	864	54.9	50-55%	22.9	28.1	0.8	1
XP_015128383.2_46133	NC_008465.4	897459	898013	-	555	555	52.3	50-55%	36.25	28.1	1.3	1
XP_015128384.2_46103	NC_008465.4	505877	506908	-	1032	1032	54.1	50-55%	26.12	28.1	0.9	1
XP_015128385.2_46104	NC_008465.4	514121	515095	+	975	975	53.7	50-55%	25.54	28.1	0.9	1
XP_015128388.2_46107	NC_008465.4	546119	552714	+	6596	6596	50.4	50-55%	17.65	28.1	0.6	1
XP_015128396.2_46102	NC_008465.4	499016	500002	+	987	987	55.1	55-60%	15.87	27.2	0.6	1
XP_015129571.2_34984	NC_006103.5	1072377	1073342	+	966	966	46.6	45-50%	15.99	28.9	0.6	1
XP_015129905.2_34989	NC_006103.5	1147207	1148154	+	948	948	46.5	45-50%	11.36	28.9	0.4	0
XP_015134022.1_14927	NC_006091.5	10908948	10914240	-	5293	5293	51.8	50-55%	26.62	28.1	0.9	1
XP_015134453.1_28116	NC_006097.5	1214151	1215110	-	960	960	48.2	45-50%	20.57	28.9	0.7	1
XP_015134455.2_28117	NC_006097.5	1219452	1222585	+	3134	3134	48.7	45-50%	23.75	28.9	0.8	1
XP_015134589.2_28118	NC_006097.5	1235531	1236502	+	972	972	43.9	40-45%	17.97	29.7	0.6	1
XP_015136428.1_6269	NC_006088.5	197338569	197339615	-	1047	1047	59.4	55-60%	30.68	27.2	1.1	1
XP_015136430.1_6253	NC_006088.5	197221554	197222528	+	975	975	43.9	40-45%	36.93	29.7	1.2	1
XP_015136433.2_6252	NC_006088.5	197204574	197205426	+	853	853	56.3	55-60%	23.27	27.2	0.9	1
XP_015136434.1_6249	NC_006088.5	197186361	197187326	-	966	966	57.3	55-60%	24.79	27.2	0.9	1
XP_015141579.1_18047	NC_006092.5	514262	515368	+	1107	1107	56.4	55-60%	26.24	27.2	1	1
XP_015141580.2_18040	NC_006092.5	491492	492444	+	953	953	51.5	50-55%	23.73	28.1	0.8	1
XP_015141581.2_18046	NC_006092.5	509330	510343	-	1014	1014	55.1	55-60%	26.78	27.2	1	1
XP_015141755.1_18180	NC_006092.5	1615834	1616781	-	948	948	53.7	50-55%	25.47	28.1	0.9	1
XP_015141795.1_18170	NC_006092.5	1249935	1250882	-	948	948	49.6	45-50%	13.21	28.9	0.5	1
XP_015154643.1_43636	NC_006114.5	2201660	2202592	-	933	933	45.2	45-50%	24.98	28.9	0.9	1
XP_015156726.2_46260	NC_008465.4	2384222	2385037	-	816	816	51.7	50-55%	22.86	28.1	0.8	1
XP_015156727.1_46261	NC_008465.4	2393693	2394628	+	936	936	54.3	50-55%	21.88	28.1	0.8	1
XP_015156729.2_46263	NC_008465.4	2406892	2407476	-	585	585	51.5	50-55%	24.15	28.1	0.9	1
XP_015156731.2_46264	NC_008465.4	2421004	2421819	+	816	816	52	50-55%	23.83	28.1	0.8	1
XP_015156733.1_46266	NC_008465.4	2444236	2456530	+	12295	12295	47.5	45-50%	24.48	28.9	0.8	1
XP_015156734.2_46268	NC_008465.4	2496069	2496845	+	777	777	51.6	50-55%	30.33	28.1	1.1	1
XP_015156736.1_46269	NC_008465.4	2502211	2503176	+	966	966	55.1	55-60%	23.49	27.2	0.9	1
XP_015156738.2_46277	NC_008465.4	2570270	2577483	-	7214	7214	50.4	50-55%	23.85	28.1	0.8	1
XP_015156741.1_46280	NC_008465.4	2614463	2615398	+	936	936	56.6	55-60%	16.51	27.2	0.6	1
XP_015156752.2_46098	NC_008465.4	425129	425992	-	864	864	55	55-60%	26.59	27.2	1	1
XP_015156753.1_46099	NC_008465.4	426497	436871	+	10375	10375	49.5	45-50%	16.37	28.9	0.6	1
XP_015156756.1_46271	NC_008465.4	2516502	2517236	+	735	735	52.8	50-55%	16.73	28.1	0.6	1
XP_015156758.2_46275	NC_008465.4	2555256	2555738	-	483	483	53.6	50-55%	26.04	28.1	0.9	1
XP_015156760.2_46285	NC_008465.4	2662935	2663525	-	591	591	52.3	50-55%	28.94	28.1	1	1
XP_015156761.1_46267	NC_008465.4	2470114	2470491	-	378	378	58.5	55-60%	23.73	27.2	0.9	1
XP_015156764.1_46286	NC_008465.4	2671893	2672849	+	957	957	54.8	50-55%	23.55	28.1	0.8	1
XP_025001086.1_46076	NC_008465.4	160351	161286	+	936	936	55.2	55-60%	24.47	27.2	0.9	1
XP_025001087.1_46077	NC_008465.4	167343	176471	+	9129	9129	50.1	50-55%	23.43	28.1	0.8	1
XP_025001088.1_46078	NC_008465.4	178613	179548	+	936	936	54.8	50-55%	23.92	28.1	0.9	1
XP_025001089.1_46082	NC_008465.4	224912	225502	-	591	591	52.5	50-55%	26.12	28.1	0.9	1
XP_025001090.1_46086	NC_008465.4	259469	260284	-	816	816	51.8	50-55%	14.81	28.1	0.5	1
XP_025001091.1_46087	NC_008465.4	268223	268738	+	516	516	55.2	55-60%	31.32	27.2	1.2	1
XP_025001092.1_46088	NC_008465.4	274851	275447	-	597	597	51.9	50-55%	23.83	28.1	0.8	1
XP_025001093.1_46089	NC_008465.4	275526	292071	-	16546	16546	48.3	45-50%	24.42	28.9	0.8	1
XP_025001094.1_46093	NC_008465.4	347316	348047	+	732	732	48.5	45-50%	10.35	28.9	0.4	0
XP_025001095.1_46094	NC_008465.4	380630	381505	+	876	876	53.4	50-55%	20.75	28.1	0.7	1
XP_025001096.1_46096	NC_008465.4	394681	395592	+	912	912	53.8	50-55%	17.77	28.1	0.6	1
XP_025001097.1_46101	NC_008465.4	488993	489928	-	936	936	54.4	50-55%	27.77	28.1	1	1
XP_025001098.1_46105	NC_008465.4	521124	521837	-	714	714	50.3	50-55%	27.08	28.1	1	1
XP_025001099.1_46110	NC_008465.4	596026	596847	-	822	822	52.6	50-55%	26.13	28.1	0.9	1
XP_025001100.1_46114	NC_008465.4	648435	649373	+	939	939	55.2	55-60%	23.39	27.2	0.9	1
XP_025001101.1_46115	NC_008465.4	679890	680858	+	969	969	54.2	50-55%	6.29	28.1	0.2	0
XP_025001102.1_46117	NC_008465.4	716134	731621	-	15488	15488	47.5	45-50%	26.69	28.9	0.9	1
XP_025001104.1_46119	NC_008465.4	755045	755848	-	804	804	52.6	50-55%	21.71	28.1	0.8	1
XP_025001105.1_46120	NC_008465.4	765233	765628	+	396	396	59.1	55-60%	19.42	27.2	0.7	1
XP_025001106.1_46122	NC_008465.4	776272	783425	+	7154	7154	49.1	45-50%	27.32	28.9	0.9	1
XP_025001107.1_46125	NC_008465.4	814580	819592	+	5013	5013	46.3	45-50%	27.2	28.9	0.9	1
XP_025001108.1_46131	NC_008465.4	859004	864039	-	5036	5036	49.6	45-50%	27.72	28.9	1	1
XP_025001109.1_46132	NC_008465.4	889020	889601	+	582	582	51	50-55%	28.52	28.1	1	1
XP_025001110.1_46135	NC_008465.4	915194	916505	-	1312	1312	50.2	50-55%	17.91	28.1	0.6	1
XP_025001111.1_46136	NC_008465.4	924867	931679	+	6813	6813	49.3	45-50%	5.77	28.9	0.2	0
XP_025001112.1_46138	NC_008465.4	940165	941133	-	969	969	54.6	50-55%	24.51	28.1	0.9	1
XP_025001113.1_46139	NC_008465.4	952656	959387	-	6732	6732	49.4	45-50%	27.42	28.9	0.9	1
XP_025001114.1_46140	NC_008465.4	963022	963936	+	915	915	55.5	55-60%	19.55	27.2	0.7	1
XP_025001115.1_46146	NC_008465.4	1028606	1029187	+	582	582	50.5	50-55%	25.16	28.1	0.9	1
XP_025001116.1_46276	NC_008465.4	2564484	2565362	+	879	879	53.6	50-55%	29.71	28.1	1.1	1
XP_025001117.1_46147	NC_008465.4	1034757	1035311	-	555	555	52.8	50-55%	0	28.1	0	0
XP_025001118.1_46148	NC_008465.4	1046058	1046594	-	537	537	53.8	50-55%	7.81	28.1	0.3	0
XP_025001119.1_46150	NC_008465.4	1069051	1070019	-	969	969	54	50-55%	18.97	28.1	0.7	1
XP_025001120.1_46151	NC_008465.4	1079054	1082068	+	3015	3015	49	45-50%	21.29	28.9	0.7	1
XP_025001121.1_46155	NC_008465.4	1113255	1114181	+	927	927	55.3	55-60%	47.68	27.2	1.8	2
XP_025001122.1_46156	NC_008465.4	1121636	1128346	-	6711	6711	49.5	45-50%	34.47	28.9	1.2	1
XP_025001123.1_46159	NC_008465.4	1150016	1150951	+	936	936	54.2	50-55%	50.69	28.1	1.8	2
XP_025001124.1_46164	NC_008465.4	1195330	1195911	-	582	582	51.5	50-55%	22.06	28.1	0.8	1
XP_025001125.1_46165	NC_008465.4	1202075	1203010	+	936	936	54.9	50-55%	25.73	28.1	0.9	1
XP_025001126.1_46169	NC_008465.4	1245531	1252334	+	6804	6804	49.3	45-50%	5.61	28.9	0.2	0
XP_025001127.1_46173	NC_008465.4	1298582	1299154	-	573	573	51.1	50-55%	26.37	28.1	0.9	1
XP_025001129.1_46177	NC_008465.4	1337212	1338123	-	912	912	54.7	50-55%	20.84	28.1	0.7	1
XP_025001132.1_46192	NC_008465.4	1545865	1546806	-	942	942	55.9	55-60%	21.59	27.2	0.8	1
XP_025001133.1_46194	NC_008465.4	1563066	1563461	-	396	396	58.8	55-60%	23.92	27.2	0.9	1
XP_025001134.1_46197	NC_008465.4	1597511	1606385	+	8875	8875	46.7	45-50%	24.38	28.9	0.8	1
XP_025001135.1_46201	NC_008465.4	1639473	1640408	-	936	936	55.1	55-60%	21.82	27.2	0.8	1
XP_025001136.1_46202	NC_008465.4	1659494	1660444	-	951	951	53.4	50-55%	20.87	28.1	0.7	1
XP_025001137.1_46204	NC_008465.4	1675816	1676631	-	816	816	52.8	50-55%	31.38	28.1	1.1	1
XP_025001138.1_46205	NC_008465.4	1692930	1700360	-	7431	7431	50.3	50-55%	25.33	28.1	0.9	1
XP_025001139.1_46206	NC_008465.4	1708521	1709123	+	603	603	52.6	50-55%	31.02	28.1	1.1	1
XP_025001140.1_46207	NC_008465.4	1712649	1713605	-	957	957	54.4	50-55%	25.01	28.1	0.9	1
XP_025001141.1_46210	NC_008465.4	1747752	1748693	-	942	942	53.5	50-55%	19.69	28.1	0.7	1
XP_025001142.1_46217	NC_008465.4	1839491	1840450	+	960	960	54.9	50-55%	21.25	28.1	0.8	1
XP_025001143.1_46218	NC_008465.4	1846186	1847139	-	954	954	54.5	50-55%	23.62	28.1	0.8	1
XP_025001144.1_46219	NC_008465.4	1862113	1862698	-	586	586	51.7	50-55%	22.45	28.1	0.8	1
XP_025001145.1_46220	NC_008465.4	1867012	1867788	-	777	777	52.4	50-55%	24.18	28.1	0.9	1
XP_025001146.1_46223	NC_008465.4	1934738	1935292	-	555	555	53.9	50-55%	24.05	28.1	0.9	1
XP_025001147.1_46224	NC_008465.4	1935395	1941159	-	5765	5765	47.5	45-50%	24.57	28.9	0.9	1
XP_025001148.1_46225	NC_008465.4	1949848	1954132	+	4285	4285	50.6	50-55%	25.29	28.1	0.9	1
XP_025001149.1_46226	NC_008465.4	1961579	1962394	-	816	816	51.8	50-55%	27.62	28.1	1	1
XP_025001150.1_46230	NC_008465.4	1992481	1998311	-	5831	5831	45.5	45-50%	23.95	28.9	0.8	1
XP_025001151.1_46236	NC_008465.4	2103998	2111873	+	7876	7876	46.7	45-50%	26.85	28.9	0.9	1
XP_025001152.1_46239	NC_008465.4	2148677	2151773	-	3097	3097	51.8	50-55%	21.59	28.1	0.8	1
XP_025001153.1_46241	NC_008465.4	2172169	2173113	+	945	945	55.6	55-60%	17.4	27.2	0.6	1
XP_025001154.1_46242	NC_008465.4	2177198	2177788	-	591	591	51.9	50-55%	23.69	28.1	0.8	1
XP_025001155.1_46247	NC_008465.4	2231371	2232929	+	1559	1559	51.2	50-55%	26.48	28.1	0.9	1
XP_025001156.1_46248	NC_008465.4	2237768	2238571	+	804	804	51.4	50-55%	7.55	28.1	0.3	0
XP_025001157.1_46249	NC_008465.4	2244110	2244664	-	555	555	52.8	50-55%	4.73	28.1	0.2	0
XP_025001158.1_46254	NC_008465.4	2315330	2316193	+	864	864	53.5	50-55%	21.52	28.1	0.8	1
XP_025001159.1_46259	NC_008465.4	2368055	2376866	+	8812	8812	50.3	50-55%	13.94	28.1	0.5	1
XP_025001160.1_46265	NC_008465.4	2434790	2441143	+	6354	6354	48.9	45-50%	18.51	28.9	0.6	1
XP_025001161.1_46270	NC_008465.4	2507035	2507796	-	762	762	51.8	50-55%	24.3	28.1	0.9	1
XP_025001162.1_46274	NC_008465.4	2539610	2540641	-	1032	1032	54.1	50-55%	22.71	28.1	0.8	1
XP_025001163.1_46284	NC_008465.4	2654370	2654960	-	591	591	53.3	50-55%	19.43	28.1	0.7	1
XP_025001164.1_46288	NC_008465.4	2703302	2704096	-	795	795	50.9	50-55%	26.41	28.1	0.9	1
XP_025001191.1_46233	NC_008465.4	2069696	2070250	+	555	555	52.8	50-55%	31.02	28.1	1.1	1
XP_025001192.1_46234	NC_008465.4	2078003	2078872	-	870	870	53	50-55%	24.71	28.1	0.9	1
XP_025001193.1_46237	NC_008465.4	2113992	2114546	+	555	555	51.5	50-55%	26.91	28.1	1	1
XP_025001194.1_46111	NC_008465.4	612805	613488	+	684	684	51.9	50-55%	21.64	28.1	0.8	1
XP_025001195.1_46116	NC_008465.4	713934	714311	-	378	378	59.5	55-60%	11.54	27.2	0.4	0
XP_025001196.1_46126	NC_008465.4	820352	820852	-	501	501	53.1	50-55%	25.33	28.1	0.9	1
XP_025001197.1_46128	NC_008465.4	835625	836002	-	378	378	58.2	55-60%	14.03	27.2	0.5	1
XP_025001198.1_46141	NC_008465.4	967863	968363	-	501	501	52.7	50-55%	25.91	28.1	0.9	1
XP_025001199.1_46152	NC_008465.4	1090251	1091186	-	936	936	55.6	55-60%	25.77	27.2	0.9	1
XP_025001200.1_46181	NC_008465.4	1372022	1372420	+	399	399	59.1	55-60%	26.48	27.2	1	1
XP_025001201.1_46213	NC_008465.4	1795882	1796265	+	384	384	58.1	55-60%	21.48	27.2	0.8	1
XP_025001202.1_46162	NC_008465.4	1189005	1189382	+	378	378	58.2	55-60%	25.4	27.2	0.9	1
XP_025001203.1_46157	NC_008465.4	1131544	1132122	+	579	579	52.5	50-55%	6.37	28.1	0.2	0
XP_025001204.1_46214	NC_008465.4	1818367	1818939	+	573	573	51.7	50-55%	11.61	28.1	0.4	0
XP_025001205.1_46188	NC_008465.4	1497225	1497785	-	561	561	52.9	50-55%	28.54	28.1	1	1
XP_025001206.1_46216	NC_008465.4	1833750	1834211	+	462	462	52.6	50-55%	25.85	28.1	0.9	1
XP_025001207.1_46191	NC_008465.4	1519229	1519597	+	369	369	58.5	55-60%	25.57	27.2	0.9	1
XP_025001208.1_46189	NC_008465.4	1510062	1510427	+	366	366	57.9	55-60%	18.86	27.2	0.7	1
XP_025001209.1_46185	NC_008465.4	1429208	1429567	-	360	360	59.4	55-60%	16.87	27.2	0.6	1
XP_025001245.1_46231	NC_008465.4	2037224	2037802	+	579	579	50.8	50-55%	26.32	28.1	0.9	1
XP_025001246.1_46095	NC_008465.4	385934	386311	-	378	378	59.3	55-60%	23.41	27.2	0.9	1
XP_025001247.1_46097	NC_008465.4	402695	403078	-	384	384	58.9	55-60%	20.84	27.2	0.8	1
XP_025001248.1_46100	NC_008465.4	444406	444801	-	396	396	58.3	55-60%	22.56	27.2	0.8	1
XP_025001309.1_46262	NC_008465.4	2399874	2400857	+	984	984	54.4	50-55%	33.62	28.1	1.2	1
XP_025001310.1_46251	NC_008465.4	2284067	2284708	-	642	642	53.7	50-55%	16.46	28.1	0.6	1
XP_025001311.1_46244	NC_008465.4	2192152	2192730	-	579	579	52.5	50-55%	3.16	28.1	0.1	0
XP_025001312.1_46246	NC_008465.4	2221022	2221483	-	462	462	55.2	55-60%	23.64	27.2	0.9	1
XP_025001313.1_46250	NC_008465.4	2268863	2269225	+	363	363	59	55-60%	2.02	27.2	0.1	0
XP_025001329.1_46235	NC_008465.4	2084677	2085435	-	759	759	53.5	50-55%	23.19	28.1	0.8	1
XP_025001333.1_46075	NC_008465.4	151815	152354	-	540	540	53	50-55%	24.69	28.1	0.9	1
XP_025001335.1_46282	NC_008465.4	2629164	2629778	+	615	615	51.5	50-55%	26.52	28.1	0.9	1
XP_025001438.1_46273	NC_008465.4	2533370	2533972	+	603	603	53.1	50-55%	23.85	28.1	0.8	1
XP_025001439.1_46229	NC_008465.4	1988953	1989912	+	960	960	55.5	55-60%	24.22	27.2	0.9	1
XP_025001440.1_46227	NC_008465.4	1970239	1971198	+	960	960	55	55-60%	29.57	27.2	1.1	1
XP_025002272.1_49762	NW_020110167.1	1412288	1413256	+	969	969	48.4	45-50%	28.12	28.9	1	1
XP_025008027.1_6266	NC_006088.5	197298555	197303805	+	5251	5251	56	55-60%	28.41	27.2	1	1
XP_025009823.1_28119	NC_006097.5	1244341	1245384	-	1044	1044	49.3	45-50%	21.44	28.9	0.7	1
XP_025009838.1_28114	NC_006097.5	1183612	1184580	+	969	969	44.3	40-45%	22.47	29.7	0.8	1
XP_025009867.1_28120	NC_006097.5	1250943	1251926	+	984	984	44.8	40-45%	2.33	29.7	0.1	0
XP_025011542.1_34967	NC_006103.5	777093	778064	+	972	972	46.4	45-50%	11.02	28.9	0.4	0
XP_025011545.1_34981	NC_006103.5	1014260	1015105	+	846	846	47	45-50%	31.01	28.9	1.1	1
XP_025011548.1_34998	NC_006103.5	1228924	1229940	+	1017	1017	46.7	45-50%	5.53	28.9	0.2	0
XP_025011551.1_35006	NC_006103.5	1311519	1312484	+	966	966	46.8	45-50%	3.75	28.9	0.1	0
XP_025011553.1_35017	NC_006103.5	1440934	1441893	+	960	960	53.1	50-55%	13.54	28.1	0.5	1
XP_025011668.1_35001	NC_006103.5	1258178	1259164	-	987	987	52	50-55%	25.02	28.1	0.9	1
XP_025011672.1_35013	NC_006103.5	1357933	1358898	+	966	966	46.7	45-50%	11.42	28.9	0.4	0
XP_025011673.1_35053	NC_006103.5	1785570	1786532	-	963	963	51.5	50-55%	61.1	28.1	2.2	2
XP_423607.5_46279	NC_008465.4	2606058	2607014	+	957	957	53.5	50-55%	25.29	28.1	0.9	1
XP_423737.6_46113	NC_008465.4	639263	639649	-	387	387	59.4	55-60%	26.28	27.2	1	1
XP_423740.6_46252	NC_008465.4	2292931	2293866	+	936	936	53.8	50-55%	25.1	28.1	0.9	1
XP_425093.5_28121	NC_006097.5	1271893	1272876	+	984	984	44.8	40-45%	6.34	29.7	0.2	0
XP_425520.4_2810	NC_006088.5	78151639	78152640	+	1002	1002	50.5	50-55%	23.58	28.1	0.8	1
XP_426384.3_18178	NC_006092.5	1606930	1607868	-	939	939	44.9	40-45%	30.23	29.7	1	1
XP_426387.4_18173	NC_006092.5	1267889	1268846	+	958	958	44.9	40-45%	28.21	29.7	0.9	1
XP_427079.4_46161	NC_008465.4	1177987	1178784	-	798	798	51.5	50-55%	26.77	28.1	1	1
XP_427449.5_46176	NC_008465.4	1332187	1333155	-	969	969	53.5	50-55%	17.71	28.1	0.6	1
XP_427634.2_46208	NC_008465.4	1721681	1722595	+	915	915	55.6	55-60%	27.02	27.2	1	1
XP_428160.3_46193	NC_008465.4	1554283	1555218	+	936	936	54.2	50-55%	20.21	28.1	0.7	1
XP_428286.2_49763	NW_020110167.1	1418772	1419710	+	939	939	50.7	50-55%	23.27	28.1	0.8	1
XP_428483.5_46167	NC_008465.4	1219266	1220237	+	972	972	54	50-55%	18.73	28.1	0.7	1
